# Supplementary material for: Effects of exenatide and liraglutide on heart rate, blood pressure and body weight: systematic review and meta-analysis
Source: PubMed Central journal article supplement — BMJ Open. 2013 Jan 24;3(1):e001986. doi: 10.1136/bmjopen-2012-001986 (PMC3563145; doi:10.1136/bmjopen-2012-001986), 2013-01-24

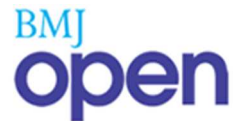

**Effects of exenatide and liraglutide on heart rate, blood pressure and body weight: Systematic review and meta-analysis**

|                                 |                                                                                                                                                                                                                                                                                                                                            |
|---------------------------------|--------------------------------------------------------------------------------------------------------------------------------------------------------------------------------------------------------------------------------------------------------------------------------------------------------------------------------------------|
| Journal:                        | <i>BMJ Open</i>                                                                                                                                                                                                                                                                                                                            |
| Manuscript ID:                  | bmjopen-2012-001986                                                                                                                                                                                                                                                                                                                        |
| Article Type:                   | Research                                                                                                                                                                                                                                                                                                                                   |
| Date Submitted by the Author:   | 28-Aug-2012                                                                                                                                                                                                                                                                                                                                |
| Complete List of Authors:       | Robinson, Louise; University of Warwick, Warwick Medical School<br>Holt, Tim; Oxford University, Department of Primary Care Health Sciences<br>Rees, Karen; University of Warwick, Warwick Medical School<br>Randeve, Harpal; University of Warwick, Warwick Medical School<br>O'Hare, Paul; University of Warwick, Warwick Medical School |
| <b>Primary Subject Heading</b>: | Diabetes and endocrinology                                                                                                                                                                                                                                                                                                                 |
| Secondary Subject Heading:      | Cardiovascular medicine                                                                                                                                                                                                                                                                                                                    |
| Keywords:                       | Physiology < BASIC SCIENCES, General diabetes < DIABETES & ENDOCRINOLOGY, Diabetes & endocrinology < INTERNAL MEDICINE, THERAPEUTICS, Adult cardiology < CARDIOLOGY                                                                                                                                                                        |
|                                 |                                                                                                                                                                                                                                                                                                                                            |

SCHOLARONE™  
Manuscripts

1  
2  
3  
4  
5  
6  
7  
8  
9  
10  
11  
12  
13

# Effects of exenatide and liraglutide on heart rate, blood pressure and body weight: Systematic review and meta-analysis

14 Louise E. Robinson, MRes<sup>1</sup>

15 Tim A. Holt, PhD MRCP FRCGP<sup>1,2</sup>

16 Karen Rees, PhD<sup>1</sup>

17 Harpal S. Randeve, PhD FRCP<sup>1</sup>

18 Joseph P. O'Hare MD FRCP<sup>1</sup>

19  
20  
21  
22  
23  
24  
25  
26  
27  
28  
29  
30  
31  
32  
33  
34  
35  
36  
37  
38  
39  
40  
41  
42  
43  
44  
45  
46  
47

<sup>1</sup> Warwick Medical School, University of Warwick, Gibbet Hill Rd, Coventry CV4 7AL, UK

<sup>2</sup> Department of Primary Care Health Sciences, University of Oxford, Radcliffe Observatory Quarter Woodstock Road, Oxford, OX2 6GG, UK

## Corresponding author:

34 Dr Tim A. Holt  
35 NIHR Academic Clinical Lecturer  
36 Department of Primary Care Health Sciences  
37 University of Oxford  
38 Radcliffe Observatory Quarter  
39 Woodstock Road  
40 Oxford OX2 6GG  
41 United Kingdom  
42 Tel: 01865 289281  
43 Fax: 01865 289287  
44 Email: [tim.holt@phc.ox.ac.uk](mailto:tim.holt@phc.ox.ac.uk)

48  
49  
50  
51

**Key MeSH terms:** Diabetes Mellitus, Type 2; Glucagon-Like Peptide 1; Heart Rate; Blood Pressure; Body Weight.

52  
53  
54  
55  
56  
57  
58  
59  
60

**Word count:** 2256 words

**ABSTRACT**

**Objectives:** To synthesise current evidence for the effects of exenatide and liraglutide on heart rate, blood pressure, and body weight.

**Design:** Meta-analysis of available data from randomised controlled trials comparing GLP-1 analogues with placebo, active anti-diabetic drug therapy, or lifestyle intervention.

**Participants:** Patients with type 2 diabetes.

**Outcome measures:** Weighted mean differences between trial arms for changes in heart rate, blood pressure and body weight, after a minimum of 12 weeks follow up.

**Results:** 32 trials were included. Liraglutide increased heart rate by 2.65 beats per minute (bpm) [95% confidence interval (CI), 1.78, 3.52] compared with placebo and by 1.61 bpm [1.10, 2.13] versus active control. Exenatide twice daily (BID) increased heart rate by 0.88 bpm [-0.47, 2.22] versus placebo but did not reach statistical significance, and by 1.36 [0.57, 2.14] versus active control. Exenatide long acting release (LAR) increased heart rate by 2.14 [1.11, 3.17] versus active control. GLP-1 agonists decreased systolic blood pressure by -1.79mmHg [-2.94, -0.64] and -2.39mmHg [-3.35, -1.42] compared to placebo and active control respectively. Reduction in diastolic blood pressure failed to reach statistical significance (-0.54mmHg [-1.15, 0.07] vs placebo and -0.50mmHg [-1.24, 0.24] vs active control). Body weight decreased by -3.31kg [-4.05, -2.57] compared to active control but by only -1.22kg [-1.51, -0.93] compared to placebo.

**Conclusions:** GLP-1 analogues are associated with a small increase in heart rate, and modest reductions in body weight and blood pressure. Mechanisms underlying the rise in heart rate require further investigation.

**ARTICLE SUMMARY****Article focus**

- GLP-1 agonists are increasingly used in the management of type 2 diabetes, but their long term cardiovascular safety is not yet confirmed.
- These agents are known to reduce body weight and blood pressure, but are also associated with an elevation in heart rate that has not previously been quantified.

**Key messages**

- Our analysis confirms the weight and blood pressure reducing effects of liraglutide and exenatide, and reports a small rise in heart rate.
- The weight reducing effects are substantially greater when compared with active control treatments than placebo, as alternative treatment options may promote weight gain.
- Heart rate rises were more evident for liraglutide than exenatide, and for exenatide long acting release (LAR) than exenatide twice daily (BID).

**Strengths and limitations**

- We included unpublished data obtained from pharmaceutical companies, enabling the effects of GLP-1 agonists on heart rate to be quantified for the first time by meta-analysis.
- Our analysis is limited by significant heterogeneity between studies, and suggests the need for more detailed investigation using more accurate measurements of heart rate than those typically used in clinical practice.

## INTRODUCTION

In contrast to the weight increasing effects of several traditional anti-diabetic drug classes,[1] GLP-1 analogues have been shown to reduce both body weight and blood pressure.[2] The mechanisms producing weight loss have been extensively investigated, and involve improved satiety and reduced calorie ingestion both through effects on the central nervous system and through delayed gastric emptying.[3-6] Those leading to reduced blood pressure are less adequately understood, but this effect has been shown to occur as early as two weeks after commencing therapy, preceding significant weight loss, suggesting that a direct hypotensive effect is at least partly responsible.[7] Experimental studies of GLP-1 analogues have also reported direct effects on blood pressure, possibly via interaction with the autonomic nervous system.[8, 9]

Whilst a number of studies have reported heart rate increases, the associated mechanisms are unknown, and this effect is often dismissed as clinically unimportant. Given the safety implications attributed to raised heart rate in other contexts,[10-13] there is a surprising lack of concern over its possible implications in this setting. A recent review of liraglutide by Buse acknowledges the effect,[14] but a meta-analysis on safety of incretin based therapies published in 2010 did not mention heart rate,[15] nor does an overview of the LEAD trials of liraglutide by Blonde and Russell-Jones.[16] A large nationwide audit of exenatide designed by the Association of British Clinical Diabetologists (ABCD) did not include heart rate as an outcome, despite citing evidence for the effect in the main published report.[17] A subsequent (on-going) ABCD audit of liraglutide also aims to identify unknown safety issues but has similarly omitted heart rate from the protocol.[18]

GLP-1 analogues are an expanding drug class, with recent development of longer acting agents including the once weekly (LAR) form of exenatide, Bydureon. This drug has recently obtained approval from the National Institute for Health and Clinical Excellence for use in type 2 diabetes and its use is likely to increase.[19] A review of trial data from five long acting GLP-1 agonists (exenatide once weekly, tasoglutide, albiglutide, LY2189265 and CJC-1134-PC) concluded that they were more likely than shorter acting formulations to raise heart rate.[20] A more recently published study of the long acting GLP-1 agent PF-04603629 reported a substantial rise in heart rate (mean increase 23 bpm at 24 hours after injection of the higher dose studied), together with a rise in diastolic blood pressure.[21]

Whilst there is no evidence to date that these agents (short or long acting) increase cardiovascular event rates, safety data are limited by short follow up duration.[22] Longer term follow up is underway but will take a number of years to complete.

1  
2  
3  
4  
5 We aimed to identify and synthesise all available heart rate data from both published and  
6 unpublished sources, to quantify the effect of GLP-1 analogues on heart rate, as well as that on  
7 blood pressure and body weight.  
8  
9

## 10 11 **METHODS**

### 12 13 **Literature searches**

14  
15 The following resources were systematically searched to identify completed, new or on-going  
16 controlled trials of liraglutide or exenatide: Clinical Trials Gov ([www.clinicaltrials.gov](http://www.clinicaltrials.gov));  
17 Entertrials.co.uk; Clinicaltrialssearch.org; Centerwatch; Drugsontrial; WebMD; MEDLINE (from 1960);  
18 EMBASE (from 1960); Cochrane Library Central Register of Controlled Trials (CENTRAL). We used a  
19 search strategy to capture “exenatide”, “liraglutide” or “glucagon-like peptide-1” in any field, limited  
20 to “Randomised Controlled Trial,” “Clinical Trial,” or “Controlled Clinical Trial”. Conference  
21 proceedings (British Endocrinology Society, Diabetes UK, European Association for the Study of  
22 Diabetes) and websites (American Diabetes Association, Federal Drug Agency and European  
23 Medicines Agency) were examined, and the reference lists of trials, meta-analyses and reviews were  
24 searched for further studies. Novo Nordisk and Amylin Pharmaceuticals were contacted directly to  
25 request unpublished data. The review is up to date at July 2012.  
26  
27  
28  
29  
30  
31  
32  
33

### 34 35 **Inclusion and exclusion criteria**

#### 36 37 a) Participants

38  
39 We only included trials involving participants with type 2 diabetes.  
40  
41

#### 42 43 b) Study designs

44 We included all randomised trials with minimum follow up of 12 weeks. We excluded ‘open-label’  
45 extension studies of phase 3 trials.  
46  
47

#### 48 49 c) Interventions

50 Trials of liraglutide (1.2 or 1.8 mg daily), exenatide (5 or 10 µg BID), or exenatide LAR, either alone or  
51 in combination with an oral anti-diabetic drug (OAD) or insulin, were included.  
52  
53  
54

#### 55 56 c) Comparison groups(s)

57 Comparators included placebo, OAD, lifestyle intervention, or insulin.  
58  
59  
60

1  
2  
3 d) Outcomes  
4

5 We included all studies reporting heart rate, blood pressure, or body weight outcomes.  
6  
7

8 **Data extraction**  
9

10 Retrieved studies were assessed for inclusion by two researchers independently using the above  
11 criteria and any discrepancies were resolved by consensus. Information on the participants,  
12 intervention, comparison group, outcomes and trial quality were extracted from included studies by  
13 two researchers independently. Where necessary, clarification of data was obtained by  
14 correspondence with trial co-ordinators.  
15  
16  
17

18 **Risk of Bias**  
19

20 We used the Cochrane tool to determine risk of selection bias (success of sequence generation and  
21 allocation concealment); performance bias (success of blinding to treatment received); detection  
22 bias (blinding of outcome assessment), attrition bias (incomplete outcome data and selective  
23 outcome reporting) and other biases.[23] Funnel plots were used to detect publication bias.  
24  
25  
26  
27

28 **Analysis**  
29

30 Means and standard deviations for baseline and outcome values for blood pressure, heart rate and  
31 body weight were extracted. Mean effect data from cross-over trials were extracted at the end of  
32 the initial phase. Where standard deviations for the outcome were not available they were imputed  
33 according to Cochrane Handbook for Systematic reviews version 5.[23] Standard deviations for  
34 changes from baseline were derived where necessary to account for correlation of baseline to follow  
35 up measurements within individuals, and where the correlation coefficient could not be calculated,  
36 methods were employed as recommended by Follman et al.[24] Study results were combined using  
37 RevMan version 5.2. Heterogeneity was estimated using the  $\chi^2$ - test and  $I^2$  statistic. Fixed and  
38 random effects weighted mean difference models using the Inverse Variance technique were used  
39 to compare outcomes between study drug and comparator with 95% confidence intervals (CI).  
40 Interaction effects were evaluated using pre-specified subgroup analyses (comparing various doses  
41 of study drug to active control or placebo) and type of GLP-1 agonist (liraglutide, exenatide BID and  
42 exenatide LAR preparations). Results are described using the random effects approach due to the  
43 heterogeneity of the included studies. Analyses were stratified by active control or placebo. Funnel  
44 plots were assessed for asymmetry.  
45  
46  
47  
48  
49  
50  
51  
52  
53  
54  
55  
56  
57  
58  
59  
60

## RESULTS

Figure 1 describes the identification of included studies. A total of 521 articles were screened. Of these, 472 were excluded on the basis of the title or abstract being irrelevant to the aims of this review. Forty-nine studies were examined in full text. Out of these, 4 were excluded because the comparator was another form of GLP-1.[25-28] In 3 cases the doses were not as specified in our inclusion criteria,[29-31] and in a further 2 the study involved further analysis of data from trials that were already included.[32, 33] Finally, 8 were open label extension studies.[34-41] This left 32 trials included in our review (Figure 1 and Table 1).[42-73] Most studies did not report all of the outcomes of interest, or did not provide them as usable numerical data. Data were therefore obtained, where available directly from the pharmaceutical companies.

### Methodological quality and risk of bias

Results of risk of bias assessment are given in Table 2. Explanation of sequence generation and allocation concealment was adequate for all trials. In nine trials at least one arm was open-label. Attrition was adequately described and was greater than 20% in nine studies. The proportion of the intention to treat (ITT) population completing the study varied with range 65.4-99.6% and median 83.7%. None of the trials were terminated prematurely. Funnel plots were broadly symmetrical with no evidence of publication bias.

### Heterogeneity

For all outcomes, we found significant heterogeneity (Figures 2 to 6). We therefore chose to report results using the random effects approach, although the differences between random effects and fixed effect results were very small.

### Heart rate

A total of 22 studies provided heart rate data. A summary from the Lead 1-5 trials of liraglutide[57, 64, 67, 69, 73] was obtained from Novo Nordisk and is given in Figure 2. Pooled results show a significant increase in heart-rate, with weighted mean difference 2.65 bpm [1.78, 3.52] versus placebo and 1.61 bpm [1.10, 2.13] versus active control. The data were provided grouped into quartiles of baseline heart rate and demonstrated significant variation in effect between these subgroups. Exenatide BID increased heart rate by 1.36 bpm [0.57, 2.14] versus active control and by 0.88 bpm [-0.47, 2.22] versus placebo, which did not reach statistical significance (Figure 3). Exenatide LAR produced a more significant change (2.14 bpm [1.11, 3.17] versus active control) but the number of studies involving this formulation was small.



### Blood pressure

We included 31 trials measuring blood pressure changes (Figures 4 and 5). GLP-1 agonists reduced systolic blood pressure by -1.79mmHg [-2.94, -0.64] compared to placebo and by -2.39 [-3.35, -1.42] compared to active control. Reductions in diastolic blood pressure failed to reach statistical significance, and were -0.54mmHg [-1.15, 0.07] compared to placebo and -0.50mmHg [-1.24, 0.24] compared to active control.

### Body weight

Twenty-one trials measuring changes in weight were included (Figure 6). We confirm a small but highly significant reduction in body weight as a result of GLP-1 therapy. Weight changed by -3.31kg [-4.05, -2.57] compared to active control but by only -1.22kg [-1.51, -0.93] compared to placebo.

### DISCUSSION

We have confirmed and quantified the effects of liraglutide and exenatide on heart rate, blood pressure and body weight. Our analysis benefited from the inclusion of unpublished data supplied by Novo Nordisk and Amylin Pharmaceuticals, as these were often missing from published trial reports. It was limited by the significant heterogeneity of effect size measurements between individual studies.

The weight reducing effects of these agents are a welcome contrast to the weight promoting effects of other treatment options, including sulphonylureas, thiazolidinediones, and insulin. We have derived a similar effect size to a previously reported value for weight loss,[2] although our study has distinguished between placebo and active comparators, in which effects sizes differ substantially. Together with the reduction in blood pressure, this may improve longer term cardiovascular risk. However, the small rise in heart rate is a reason for caution, as it might potentially be associated with adverse outcomes. This rise was more evident for liraglutide than exenatide BID, but exenatide LAR may produce a greater response than the BID formulation.

For most GLP-1 trials, heart rate is a secondary outcome measured as part of safety assessment, and is reported inconsistently. In clinic it is often measured using a very short sampling interval (perhaps one minute of data). One study was designed specifically to examine the effects of exenatide BID on change in heart rate as the primary outcome using 24 hour ambulatory monitoring.[58] The mean change from baseline at 12 weeks was 2.1 bpm for exenatide BID and -0.7 bpm for placebo. The sample size (54 randomised participants) in this pilot study was relatively small and the difference was not significant ( $p=0.16$ ), but is similar to the values we have obtained generally for GLP-1

agonists in our meta-analysis. Measurement of heart rate using this 24-hour technique (compared with a traditional heart rate measurement in clinic) substantially improves the accuracy of measurement as heart rate is very variable within the individual. This technique could be used as a basis for a larger study powered to detect such a difference. This would enable investigation of pre-specified subgroups, including those with low baseline heart rate, who appeared in the LEAD studies of liraglutide to experience a more substantial change of 4.8 bpm versus placebo.

This review highlights the need to improve our understanding of the physiological mechanisms through which GLP-1 agonists act, whilst the results of longer term safety studies are awaited. There is also a clear need to improve the comprehensive reporting of all outcome data measured during clinical trials of anti-diabetic agents, particularly those relevant to cardiovascular risk.

#### **ACKNOWLEDGEMENTS**

We would like to thank Amylin Pharmaceuticals and Novo Nordisk for providing us with unpublished data for this meta-analysis.

#### **CONTRIBUTORSHIP STATEMENT**

LR, PO'H and HR were involved in the design and conception of the study. LR and TH conducted the bibliographic searches, identified the included papers, and extracted the data independently. KR advised on methodological issues. All authors were involved in drafting the manuscript.

#### **ETHICAL APPROVAL**

None required.

#### **FUNDING STATEMENT**

This research received no specific grant from any funding agency in the public, commercial or not-for-profit sectors.

#### **COMPETING INTERESTS**

LR, TH and KR have no interests to declare. PO'H and HR have received research funding (paid to Warwick Medical School) from Novo Nordisk, and payments for speaking from Novo Nordisk.

#### **DATA SHARING**

All data used in this study are freely available by request to the corresponding author Dr Tim A. Holt.

## REFERENCES

1. Nathan DM, Buse JB, Davidson MB, et al. Medical management of hyperglycemia in type 2 diabetes: A consensus algorithm for the initiation and adjustment of therapy. *Diabetes Care* 2009;**32**:193–203.
2. Vilsboll T, Christensen M, Junker AE, et al. Effects of glucagon-like peptide receptor agonists on weight loss: systematic review and meta-analyses of randomized controlled trials. *BMJ* 2012;**344**:1-11.
3. Flint A, Raben A, Astrup A, Holst JJ. Glucagon-like peptide 1 promotes satiety and suppresses energy intake in humans. *J Clin Invest* 1998;**101**:515–520.
4. MacDonald PE, El-kholy W, Riedel MJ, et al. The multiple actions of GLP-1 on the process of glucose-stimulated insulin secretion. *Diabetes* 2002;**51**(Suppl. 3):S434–S442.
5. Willms B, Werner J, Holst JJ, et al. Gastric emptying, glucose responses, and insulin secretion after a liquid test meal: effects of exogenous glucagon-like peptide-1 (GLP-1)-(7-36) amide in type 2 (noninsulin-dependent) diabetic patients. *J Clin Endocrinol Metab* 1996;**81**:327-332.
6. Meier JJ, Nauck MA. Glucagon-like peptide 1(GLP-1) in biology and pathology. *Diabetes Metab Res Rev* 2005;**21**:91–117.
7. Varanasi A, Chaudhuri A, Dhindsa S, et al. Durability of effects of exenatide on glycaemic control, body weight, systolic blood pressure, C-reactive protein and triglyceride concentrations. *Endocrin Prac* 2011;**17**:192-200.
8. Bojanowska E, Stempniak B. Effects of glucagon-like peptide-1 (7-36) amide on neurohypophysial hormone secretion induced by acute hyperosmotic challenge. *Neuropeptides* 2003;**37**:45-50.
9. Bharucha AE, Charkoudian N, Andrews CN, et al. Effects of glucagon-like peptide-1, yohimbine, and nitrenergic modulation on sympathetic and parasympathetic activity in humans. *Am J Physiol Regul Integr Comp Physiol* 2008;**295**:R874–R880.
10. Levine HJ . Rest heart rate and life expectancy. *J Am Coll Cardiol* 1997;**30**:1104-6.

- 1  
2  
3 11. Aronow WS, Ahn C, Mercado AD, et al. Association of average heart rate on 24-hour  
4 ambulatory electrocardiograms with incidence of new coronary events at 48-month follow-up in  
5 1311 patients (mean age 81 years) with heart disease and sinus rhythm. *Am J Cardiol* 1996;**78**:  
6 1175–6.  
7  
8
- 9  
10  
11 12. Hozawa A, Ohkubo T, Kikuya M, et al. Prognostic value of home heart rate for cardiovascular  
12 mortality in the general population: the Ohasama study. *Am J Hypertens* 2004;**17**:1005–10.  
13
- 14  
15 13. Anselmino M, Öhrvik J, Rydén L. Resting heart rate in patients with stable coronary artery  
16 disease and diabetes: a report from the euro heart survey on diabetes and the heart. *Eur Heart J*  
17 2010;**31**:3040-5.  
18  
19
- 20  
21 14. Bode B. An overview of the pharmacokinetics, efficacy and safety of liraglutide. *Diab Res Clin*  
22 *Pract* 2012;**97**:27-42.  
23  
24
- 25  
26 15. Fakhoury WKH, Lereun C, Wright D. A meta-analysis of placebo-controlled clinical trials assessing  
27 the efficacy and safety of incretin- based medications in patients with type 2 diabetes.  
28 *Pharmacol* 2010;**86**:44-57.  
29  
30
- 31  
32 16. Blonde L, Russell-Jones D. The safety and efficacy of liraglutide with or without oral antidiabetic  
33 drug therapy in type 2 diabetes: an overview of the LEAD 1-5 studies. *Diabetes Obes Metab*  
34 2009;**11**(Suppl 3):26-34.  
35  
36
- 37  
38 17. Ryder REJ, Thong KY, Cull ML, et al, on behalf of the ABCD nationwide exenatide audit  
39 contributors. The Association of British Clinical Diabetologists (ABCD) nationwide exenatide  
40 audit. *Practical Diabetes Int* 2010;**27**:352–357.  
41  
42
- 43  
44 18. [http://www.diabetologists-abcd.org.uk/Objectives\\_Liraglutide\\_Audit.htm](http://www.diabetologists-abcd.org.uk/Objectives_Liraglutide_Audit.htm) (accessed 18<sup>th</sup> April  
45 2012)  
46  
47
- 48  
49 19. National Institute for Health and Clinical Excellence. Technology Appraisal TA248. Exenatide  
50 prolonged-release suspension for injection in combination with oral antidiabetic therapy for the  
51 treatment of type 2 diabetes. London, NICE, 2012.  
52  
53  
54  
55  
56  
57  
58  
59  
60

- 1  
2  
3 20. Madsbad S, Kielgast U, Asmar M, et al. An overview of once-weekly glucagon-like peptide-1  
4 receptor agonists - available efficacy and safety data and perspectives for the future. *Diabetes,*  
5  
6 *Obesity and Metabolism* 2011;**13**:394-407.  
7  
8  
9 21. Gustavson SM, Chen D, Somayaji V, et al. Effects of a long-acting GLP-1 mimetic (PF-04603629)  
10 on pulse rate and diastolic blood pressure in patients with type 2 diabetes mellitus. *Diabetes,*  
11  
12 *Obesity and Metabolism* 2011;**13**:1056–58.  
13  
14  
15 22. Ratner R, Han J, Nicewarner D, Yushmanova I, et al. Cardiovascular safety of exenatide BID: an  
16 integrated analysis from controlled clinical trials in participants with type 2 diabetes. *Cardiovasc*  
17  
18 *Diabetol* 2011;**10**:22-32.  
19  
20  
21 23. Higgins JPT, Green S (editors). *Cochrane Handbook for Systematic Reviews of Interventions*  
22 Version 5.1.0 [updated March 2011]. The Cochrane Collaboration, 2011. Available from  
23  
24 [www.cochrane-handbook.org](http://www.cochrane-handbook.org).  
25  
26  
27  
28 24. Follman D, Elliott P, Suh I, et al. Variance imputation for overviews of clinical trials with  
29 continuous response. *J Clin Epidemiol* 1992;**45**:769-73.  
30  
31  
32 25. Blevins T, Pullman J, Malloy J, et al. DURATION 5: Exenatide once weekly resulted in greater  
33 improvements in glycemic control compared with exenatide twice daily in patients with type 2  
34  
35 diabetes. *J Clin Endocrinol Metab* 2011;**96**:1301-10.  
36  
37  
38 26. Buse JB, Rosenstock J, Sesti G, et al. Liraglutide once a day versus exenatide twice a day for type  
39  
40  
41  
42  
43  
44  
45  
46  
47  
48  
49  
50  
51  
52  
53  
54  
55  
56  
57  
58  
59  
60

- 1  
2  
3 29. Bunck MC, Diamant M, Corner A, et al. One-year treatment with exenatide improves beta-cell  
4 function, compared with insulin glargine, in metformin-treated type 2 diabetic patients: a  
5 randomized, controlled trial. *Diabetes Care* 2009;**32**:762-768.  
6  
7  
8  
9  
10 30. Feinglos MN, Saad MF, Pi-Sunyer FX, An B, Santiago O. Effects of liraglutide (NN2211), a long-  
11 acting GLP-1 analogue, on glycaemic control and bodyweight in subjects with Type 2 diabetes.  
12 *Diabet Med* 2005;**22**:1016-1023.  
13  
14  
15  
16 31. Vilsboll T, Zdravkovic M, Le-Thi T, et al. Liraglutide, a long-acting human glucagon-like peptide-1  
17 analog, given as monotherapy significantly improves glycemic control and lowers body weight  
18 without risk of hypoglycemia in patients with type 2 diabetes. *Diabetes Care* 2007;**30**:1608-10.  
19  
20  
21  
22 32. Bode BW, Testa MA, Magwire M, et al. Patient-reported outcomes following treatment with the  
23 human GLP-1 analogue liraglutide or glimepiride in monotherapy: results from a randomized  
24 controlled trial in patients with type 2 diabetes. *Diabetes, Obesity and Metabolism* 2010;**12**:604-  
25 12.  
26  
27  
28  
29  
30  
31 33. Davies M, Pratley R, Hammer M, et al. Liraglutide improves treatment satisfaction in people with  
32 Type 2 diabetes compared with sitagliptin, each as an add on to metformin. *Diabet Med*  
33 2011;**28**:333-337.  
34  
35  
36  
37 34. Bunck MC, Cornér A, Eliasson B, et al. One year treatment with exenatide vs. insulin glargine:  
38 effects on post-prandial glycemia, lipid profiles and oxidative stress. *Atherosclerosis* 2010;**212**:  
39 223-9.  
40  
41  
42  
43 35. Bunck MC, Cornér A, Eliasson B, et al. Effects of exenatide on measures of beta-cell function  
44 after 3 years in metformin-treated patients with type 2 diabetes. *Diabetes Care* 2011;**34**:2041-7.  
45  
46  
47  
48 36. Buse JB, Klonoff DC, Nielsen LL, et al. Metabolic effects of two years of exenatide treatment on  
49 diabetes, obesity, and hepatic biomarkers in patients with type 2 diabetes: an interim analysis of  
50 data from the open-label, uncontrolled extension of three double-blind, placebo-controlled  
51 trials. *Clin Ther* 2007;**29**:139-153.  
52  
53  
54  
55  
56  
57  
58  
59  
60

- 1  
2  
3 37. Klonoff DC, Buse JB, Nielsen LL, et al. Exenatide effects on diabetes, obesity, cardiovascular risk  
4 factors and hepatic biomarkers in patients with type 2 diabetes treated for at least 3 years. *Curr*  
5 *Med Res Opin* 2008;**24**:275-86.  
6  
7  
8  
9  
10 38. Pratley R, Nauck M, Bailey T, et al. One year of liraglutide treatment offers sustained and more  
11 effective glycaemic control and weight reduction compared with sitagliptin, both in combination  
12 with metformin, in patients with type 2 diabetes: a randomised, parallel-group, open-label trial.  
13 *Int J Clin Pract* 2011;**65**:397-407.  
14  
15  
16  
17  
18 39. Ratner RE, Maggs D, Nielsen LL. et al. Long term effects of exenatide therapy over 82 weeks on  
19 glycemic control and weight in overweight metformin treated patients with type 2 diabetes  
20 mellitus. *Diab Obes Metab* 2006;**8**:419-28.  
21  
22  
23  
24 40. Riddle MC, Henry RR, Poon TH, et al. Exenatide elicits sustained glycaemic control and  
25 progressive reduction of body weight in patients with type 2 diabetes inadequately controlled by  
26 sulphonylureas with or without metformin. *Diabetes Metab Res Rev* 2006;**22**:483-91.  
27  
28  
29  
30  
31 41. Wysham C, Bergenstal R, Malloy J, et al. DURATION-2: efficacy and safety of switching from  
32 maximum daily sitagliptin or pioglitazone to once-weekly exenatide. *Diabet Med* 2011;**28**:705-  
33 14.  
34  
35  
36  
37 42. Apovian CM, Bergenstal RM, Cuddihy RM, et al. Effects of exenatide combined with lifestyle  
38 modification in patients with type 2 diabetes. *Am J Med* 2010;**123**:468-77.  
39  
40  
41  
42 43. Barnett AH, Burger J, Johns D, et al. Tolerability and efficacy of exenatide and titrated insulin  
43 glargine in adult patients with type 2 diabetes previously uncontrolled with metformin or a  
44 sulphonylurea: a multinational, randomised, open label two period crossover non-inferiority  
45 trial. *Clinical Therapeutics* 2007;**29**:2333-48.  
46  
47  
48  
49  
50 44. Bergenstal R, Lewin A, Bailey T, et al. Efficacy and safety of biphasic insulin aspart 70/30 versus  
51 exenatide in subjects with type 2 diabetes failing to achieve glycemic control with metformin  
52 and a sulfonylurea. *Curr Med Res Opin* 2009;**25**:65-75.  
53  
54  
55  
56  
57  
58  
59  
60

- 1  
2  
3 45. Bergenstal RM, Wysham C, MacConell L, et al. Efficacy and safety of exenatide once weekly  
4 versus sitagliptin or pioglitazone as an adjunct to metformin for treatment of type 2 diabetes  
5 (DURATION-2): a randomised trial. *Lancet* 2010;**376**:431-9.  
6  
7  
8  
9  
10 46. Buse JB, Henry RR, Han J, et al. Effects of exenatide (Exendin-4) on glycaemic control over 30  
11 weeks in patients with type 2 diabetes treated with metformin and a sulphonylurea. *Diabetes*  
12 *Care* 2004;**27**:2628-35.  
13  
14  
15  
16 47. Buse JB, Bergenstal RM, Glass LC, et al. Use of twice daily exenatide in basal insulin-treated  
17 patients with type 2 diabetes. A randomized controlled trial. *Ann Int Med* 2011;**154**:103-112.  
18  
19  
20  
21 48. Davies MJ, Donnelly R, Barnett AH, et al. Exenatide compared with long-acting insulin to achieve  
22 glycaemic control with minimal weight gain in patients with type 2 diabetes: results of helping  
23 evaluate exenatide in patients with diabetes compared with long-acting insulin (HEELA) study.  
24 *Diabetes Obes Metab* 2009;**11**:1153-64.  
25  
26  
27  
28  
29 49. DeFronzo RA, Ratner RE, Han J, et al. Effects of exenatide (exendin-4) on glycemic control and  
30 weight over 30 weeks in metformin-treated patients with type 2 diabetes. *Diabetes Care*  
31 2005;**28**:1092-1100.  
32  
33  
34  
35  
36 50. Defronzo RA, Triplitt C, Qu Y, et al. Effects of exenatide plus rosiglitazone on beta-cell function  
37 and insulin sensitivity in subjects with type 2 diabetes on metformin. *Diabetes Care* 2010;**33**:951-  
38 7.  
39  
40  
41  
42 51. Derosa G, Maffioli P, Salvadeo SA, et al. Exenatide vs. glibenclamide in patients with diabetes.  
43 *Diabetes Technol Therap* 2010;**12**:233-40.  
44  
45  
46 52. Derosa G, Putignano P, Bossi AC, et al. Exenatide or glimepiride added to metformin on  
47 metabolic control and on insulin resistance in type 2 diabetic patients. *Eur J Pharmacol*  
48 2011;**666**:251-6.  
49  
50  
51  
52  
53 53. Diamant M, Gaal L, Stranks S, et al. Once weekly exenatide compared with insulin glargine  
54 titrated to target in patients with Type 2 Diabetes (DURATION 3): An open-label randomised  
55 trial. *Lancet* 2010;**375**:2234-43.  
56  
57  
58  
59  
60



- 1  
2  
3 54. Gallwitz B, Bohmer M, Segiet T, et al. Exenatide twice daily versus premixed insulin aspart 70/30  
4  
5 in metformin-treated patients with type 2 diabetes: a randomized 26-week study on glycaemic  
6  
7 control and hypoglycaemia. *Diabetes Care* 2011;**34**:604-6.  
8  
9  
10 55. Gallwitz B, Guzman J, Dotta F, et al. Exenatide twice daily versus glimepiride for prevention of  
11  
12 glycaemic deterioration in patients with type 2 diabetes with metformin failure (EUREXA): an  
13  
14 open-label, randomised controlled trial. *Lancet* 2012;**379**:2270-8.  
15  
16 56. Gao Y, Yoon KH, Chuang L-M, et al. Efficacy and safety of exenatide in patients of Asian descent  
17  
18 with type 2 diabetes inadequately controlled with metformin or metformin and a sulphonylurea.  
19  
20 *Diabetes Res Clin Pract* 2009;**83**:69-76.  
21  
22 57. Garber A, Henry R, Ratner R, et al for the LEAD-3 (Mono) Study Group. Liraglutide versus  
23  
24 glimepiride monotherapy for type 2 diabetes (LEAD-3 Mono): a randomised, 52-week, phase III,  
25  
26 double-blind, parallel-treatment trial. *Lancet* 2009;**373**:473-81.  
27  
28  
29 58. Gill A, Hoogwerf BJ, Burger J, et al. Effect of exenatide on heart rate and blood pressure in  
30  
31 subjects with type 2 diabetes mellitus: a double blind, placebo controlled, randomized pilot  
32  
33 study. *Cardiovasc Diabetol* 2010;**9**:6.  
34  
35  
36 59. Heine RJ, Van Gaal LF, Johns D, et al. GWAA Study Group. Exenatide vs insulin glargine in  
37  
38 patients with suboptimally controlled type 2 diabetes: a randomised trial. *Ann Intern Med*  
39  
40 2005;**143**:559-69.  
41  
42 60. Kadowaki T, Namba M, Yamamura A, et al. Exenatide exhibits dose-dependent effects on  
43  
44 glycaemic control over 12 weeks in Japanese patients with suboptimally controlled type 2  
45  
46 diabetes. *Endocr J* 2009;**56**:415-24.  
47  
48  
49 61. Kendall DM, Riddle MC, Rosenstock J, et al. Effects of exenatide (Exendin-4) on glycaemic control  
50  
51 over 30 weeks in patients with type 2 diabetes treated with metformin and a sulphonylurea.  
52  
53 *Diabetes Care* 2005;**28**:1083-91.  
54  
55  
56  
57  
58  
59  
60

- 1  
2  
3 62. Kim D, MacConell L, Zhuang D, et al. Effects of once-weekly dosing of a long-acting release  
4 formulation of exenatide on glucose control and body weight in subjects with type 2 diabetes.  
5 Diabetes Care 2007;**30**:1487-93.  
6  
7  
8  
9 63. Liutkus J, Guzman JR, Norwood P, et al. A placebo- controlled trial of exenatide twice-daily added  
10 to thiazolidinediones alone or in combination with metformin. Diabetes Obes Metab  
11 2010;**12**:1058-65.  
12  
13  
14 64. Marre M, Shaw J, Brandle M, et al. Liraglutide once-daily human GLP-1 analogue, added to a  
15 sulphonylurea over 26 weeks produces greater improvements in glycaemic and weight control  
16 compared with adding rosiglitazone or placebo in subjects with type 2 diabetes (Lead 1-SU).  
17 Diabet Med 2009;**26**:268-78.  
18  
19  
20 65. Moretto TJ, Milton DR, Ridge TD. et al. Efficacy and tolerability of exenatide monotherapy over  
21 24 weeks in antidiabetic drug-naive patients with type 2 diabetes: A randomized, double blind,  
22 placebo-controlled parallel-group study. Clinical Therapeutics 2008;**30**:1448-60.  
23  
24  
25 66. Nauck M A, Duran S, Kim D, et al. A comparison of twice-daily exenatide and biphasic insulin  
26 aspart in patients with type 2 diabetes who were suboptimally controlled with sulfonylurea and  
27 metformin: a non-inferiority study. Diabetologia 2007;**50**:259-267.  
28  
29  
30 67. Nauck M, Frid A, Hermansen K, et al. Efficacy and safety comparison of liraglutide, glimepiride  
31 and placebo, all in combination with metformin in type 2 diabetes. Diabetes Care 2009;**32**:84-90.  
32  
33  
34 68. Pratley R E, Nauck M, Bailey T, et al. Liraglutide vs sitagliptin for patients with type 2 diabetes  
35 who did not have adequate glycemc control with metformin: a 26 week, randomised, parallel  
36 group, open- label trial. Lancet 2010;**375**:1447-56.  
37  
38  
39 69. Russell-Jones D, Vaag A, Schmitz O, et al. Liraglutide vs insulin glargine and placebo in  
40 combination with metformin and sulfonylurea therapy in type 2 diabetes mellitus (LEAD-5  
41 met+SU): a randomised controlled trial. Diabetologia 2009;**52**:2046-55.  
42  
43  
44  
45  
46  
47  
48  
49  
50  
51  
52  
53  
54  
55  
56  
57  
58  
59  
60

- 1  
2  
3 70. Russell-Jones D, Cuddihy RM, Hanefeld M, et al. Efficacy and safety of exenatide once weekly  
4 versus metformin, pioglitazone, and sitagliptin used as monotherapy in drug-naïve patients with  
5 type 2 diabetes (DURATION-4): a 26-week double-blind study. *Diabetes Care* 2012;**35**:252-8.  
6  
7  
8  
9 71. Yang W, Chen L, Ji Q, et al. Liraglutide provides similar glycaemic control as glimepiride (both in  
10 combination with metformin) and reduces body weight and systolic blood pressure in Asian  
11 population with type 2 diabetes from China, South Korea and India: a 16-week, randomized,  
12 double-blind, active control trial. *Diabetes Obes Metab* 2011;**13**:81-8.  
13  
14  
15  
16 72. Zinman B, Hoogerworf B J, Garcia SD, et al . The effect of adding exenatide to a thiazolidinedione  
17 in sub- optimally controlled type 2 diabetes. A randomized trial. *Ann Intern Med* 2007;**146**:477-  
18 485.  
19  
20  
21  
22  
23 73. Zinman B, Gerich J, Buse J, et al. Efficacy and safety of the human glucagon-like peptide-1 analog  
24 liraglutide in combination with metformin and thiazolidinedione in patients with type 2 diabetes  
25 (LEAD-4 Met+TZD). *Diabetes Care* 2009;**32**:1224-30.  
26  
27  
28  
29  
30  
31  
32  
33

#### 34 **FIGURE LEGENDS**

35  
36  
37 Figure 1: PRISMA flow diagram

38  
39 Figure 2: Effect of liraglutide on heart rate in patients with type 2 diabetes

40  
41  
42 Figure 3: Effect of exenatide on heart rate in patients with type 2 diabetes

43  
44  
45 Figure 4: GLP-1 agonists' effect on systolic blood pressure in patients with type 2 diabetes

46  
47  
48 Figure 5: GLP-1 agonists' effect on diastolic blood pressure in patients with type 2 diabetes

49  
50  
51 Figure 6: GLP-1 agonists' effects on body weight  
52  
53  
54  
55  
56  
57  
58  
59  
60

Table 1 Characteristics of included studies

| Study                   | Comparisons                     | Duration (weeks) | Study population/ ethnicity | Country        | Body weight groups included | Balanced Male/ Female? | Standardised diet/ exercise | Background OAD |
|-------------------------|---------------------------------|------------------|-----------------------------|----------------|-----------------------------|------------------------|-----------------------------|----------------|
| <b>Apovian, 2010</b>    | EX/PLAC                         | 24               | MR                          | US             | OW                          | >60% F                 | Y                           | MET and/or SU  |
| <b>Barnett, 2007</b>    | EX/IG                           | 16               | MR                          | Multi-national | N/OW/<br>OB                 | Y                      | N                           | MET or SU      |
| <b>Bergenstal, 2009</b> | EX/BIAsp                        | 24               | MR                          | US             | N/OW                        | Y                      | N                           | MET and SU     |
| <b>Bergenstal, 2010</b> | EX LAR vs PIO<br>EX LAR vs SITA | 26               | MR                          | Multi-national | N/OW/<br>OB                 | Y                      | N                           | MET            |
| <b>Buse, 2004</b>       | EX/PLAC                         | 30               | MR                          | US             | OW/OB                       | 60% M                  | N                           | SU             |
| <b>Buse, 2011</b>       | IG+EX/ IG+PLAC                  | 30               | MR                          | Multi-national | N/OW/<br>OB                 | Y                      | N                           | MET or PIO     |

|                           |            |                    |        |                |        |              |   |                                          |
|---------------------------|------------|--------------------|--------|----------------|--------|--------------|---|------------------------------------------|
| <b>Davies,<br/>2009</b>   | EX/IG      | 26                 | MR     | GB             | OW/OB  | >60% M       | N | Two or three<br>OADS: MET,<br>SU, or TZD |
| <b>Defronzo,<br/>2005</b> | EX/PLAC    | 30                 | MR     | US             | OW/OB  | Y            | N | MET                                      |
| <b>Defronzo,<br/>2010</b> | EX vs ROSI | 20                 | MR     | US             | OW/OB  | Y            | N | MET                                      |
| <b>Derosa,<br/>2010</b>   | EX/GLIB    | 52                 | W      | IT             | OW/OB  | Y            | Y | MET                                      |
| <b>Derosa,<br/>2011</b>   | EX/GLIM    | 52                 | CAUC   | IT             | OW/OB  | Y            | Y | MET                                      |
| <b>Diamant,<br/>2010</b>  | EX LAR/IG  | 26                 | MR     | Multi-national | OW/OB  | Y            | N | MET                                      |
| <b>Gallwitz,<br/>2011</b> | EX/BIAsp   | 26                 | MR     | GER            | OW/OB  | Not reported | N | MET                                      |
| <b>Gallwitz<br/>2012</b>  | EX/GLIM    | Up to 4.5<br>years | MR     | Multi-national | OW/OB  | Y            | N | MET                                      |
| <b>Gao,</b>               | EX/PLAC    | 12                 | C//K/T | Multi-national | N/OW// | Y            | N | MET and/or<br>SU                         |

|                       |             |    |    |                |             |        |   |                                            |
|-----------------------|-------------|----|----|----------------|-------------|--------|---|--------------------------------------------|
| 2009                  |             |    |    |                | OB          |        |   |                                            |
| <b>Garber, 2009</b>   | LIR/GLIM    | 52 | MR | US/MEX         | N/OW/<br>OB | Y      | N | Nil - previous<br>OAD<br>withdrawn         |
| <b>Gill, 2010</b>     | EX/PLAC     | 12 | MR | CAN/NL         | OW/OB       | Y      | N | MET and/or<br>TZD                          |
| <b>Heine, 2005</b>    | EX/IG       | 26 | MR | Multi-national | OW/OB       | Y      | N | MET and SU                                 |
| <b>Kadowaki, 2009</b> | EX/PLAC     | 12 | JP | JP             | N/OW/<br>OB | >60% M | N | SU, with or<br>without either<br>BG or TZD |
| <b>Kendall, 2005</b>  | EX/PLAC     | 30 | MR | US             | OW/OB       | Y      | Y | MET and SU                                 |
| <b>Kim, 2007</b>      | EX LAR/PLAC | 15 | MR | US             | OW/OB       | 60% M  | Y | MET                                        |
| <b>Liutkus, 2010</b>  | EX/PLAC     | 26 | MR | Multi-national | OW/OB       | Y      | N | TZD with or<br>without MET                 |
| <b>Marre, 2009</b>    | LIR/PLAC    | 26 | MR | Multi-national | N/OW/       | Y      | N | SU with or                                 |

|                            |                                         |    |       |                |              |   |   |                         |
|----------------------------|-----------------------------------------|----|-------|----------------|--------------|---|---|-------------------------|
|                            |                                         |    |       |                | OB           |   |   | without ROSI            |
| <b>Moretto, 2008</b>       | EX/PLAC                                 | 24 | MR    | Multi-national | OW/OB        | Y | Y | DRUG NAIVE              |
| <b>Nauck, 2007</b>         | EX/PIA                                  | 52 | MR    | Multi-national | OW/OB        | Y | N | SU and MET              |
| <b>Nauck, 2009</b>         | LIR/GLIM/PLAC                           | 26 | MR    | Multi-national | N/OW/<br>OB  | Y | N | MET                     |
| <b>Pratley, 2010</b>       | LIR/SIT                                 | 26 | MR    | Multi-national | N- OW-<br>OB | Y | N | MET                     |
| <b>Russell-Jones, 2009</b> | LIR/IG/PLAC                             | 26 | MR    | Multi-national | N/OW/<br>OB  | Y | N | MET and SU              |
| <b>Russell-Jones, 2012</b> | EX LAR/MET<br>EX LAR/PIO<br>EX LAR/SITA | 26 | MR    | Multi-national | N/OW/<br>OB  | Y | N | DRUG NAIVE              |
| <b>Yang, 2011</b>          | LIR/GLIM                                | 16 | C/K/I | Multi-national | N/OW/<br>OB  | Y | N | MET                     |
| <b>Zinman, 2007</b>        | EX/PLAC                                 | 16 | MR    | Multi-national | OW/OB        | Y | N | TZD with or without MET |

1  
2  
3  
4  
5  
6  
7  
8  
9  
10  
11  
12  
13  
14  
15  
16  
17  
18  
19  
20  
21  
22  
23  
24  
25  
26  
27  
28  
29  
30  
31  
32  
33  
34  
35  
36  
37  
38  
39  
40  
41  
42  
43  
44  
45  
46  
47  
48  
49

|                 |          |    |    |        |             |   |   |                 |
|-----------------|----------|----|----|--------|-------------|---|---|-----------------|
| Zinman,<br>2009 | LIR/PLAC | 26 | MR | US/CAN | N/OW/<br>OB | Y | N | MET and<br>ROSI |
|-----------------|----------|----|----|--------|-------------|---|---|-----------------|

EX, Exenatide; EX LAR, Exenatide long acting release; PLAC, placebo; IG, insulin glargine; BIAsp, biphasic insulin aspart; PIO, pioglitazone; SITA, sitagliptin; ROSI, rosiglitazone; GLIB, glibenclamide; GLIM, glimepiride; LIR, liraglutide; MET, metformin, BG, Biguanide.

MR, Multi-racial; C, Chinese; K, Korean; I, Indian; T, Taiwanese; JP, Japanese; W, White; CAUC, Caucasian.

GB, Great Britain; US, United States; GER, Germany; CAN, Canada; JP, Japan; NL, Netherlands; MEX, Mexico; IT, Italy.

N, normal weight; OW, overweight; OB, obese.



**Table 2 Risk of bias across included studies**

Included studies were assessed using the Cochrane Risk of Bias Tool for factors which may cause bias in the trial outcomes and subsequent evaluation by meta-analysis: A) Randomisation, B) Allocation concealment, C) Blinding of participants/investigators/sponsors, D) Blinding outcome assessment, E) Incomplete outcome data, F) Selective outcome reporting, G) Other bias.

| No. | Study                         | A | B | C | D | E | F | G | Comments                                                                                     |
|-----|-------------------------------|---|---|---|---|---|---|---|----------------------------------------------------------------------------------------------|
| 1   | Apovian, 2010 <sup>□</sup>    |   |   |   |   |   |   |   | Greater than 20% attrition.                                                                  |
| 2   | Barnett, 2007* <sup>□</sup>   |   |   |   |   |   |   |   | Open label cross-over study.                                                                 |
| 3   | Bergenstal, 2009 <sup>□</sup> |   |   |   |   |   |   |   | Open label. Greater than 20% attrition and higher attrition in exenatide group.              |
| 4   | Bergenstal, 2010 <sup>□</sup> |   |   |   |   |   |   |   | Greater than 20% attrition. Outcome assessors unblinded after finalisation of analysis plan. |
| 5   | Buse, 2004                    |   |   |   |   |   |   |   | Greater than 20% attrition. Higher attrition in the placebo arm.                             |
| 6   | Buse, 2011 <sup>□</sup>       |   |   |   |   |   |   |   | Groups not balanced for sex and concomitant medication.                                      |
| 7   | Davies, 2009                  |   |   |   |   |   |   |   | Open label.                                                                                  |

1  
2  
3  
4  
5  
6  
7  
8  
9  
10  
11  
12  
13  
14  
15  
16  
17  
18  
19  
20  
21  
22  
23  
24  
25  
26  
27  
28  
29  
30  
31  
32  
33  
34  
35  
36  
37  
38  
39  
40  
41  
42  
43  
44  
45  
46  
47  
48  
49

|    |                                   |  |  |  |  |  |  |  |                                                                                |
|----|-----------------------------------|--|--|--|--|--|--|--|--------------------------------------------------------------------------------|
| 8  | <b>Defronzo, 2005</b>             |  |  |  |  |  |  |  |                                                                                |
| 9  | <b>Defronzo, 2010<sup>□</sup></b> |  |  |  |  |  |  |  | Open label. Greater than 20% attrition.                                        |
| 10 | <b>Derosa, 2010</b>               |  |  |  |  |  |  |  | Single blind.                                                                  |
| 11 | <b>Derosa, 2011<sup>†</sup></b>   |  |  |  |  |  |  |  | Single blind.                                                                  |
| 12 | <b>Diamant, 2010<sup>□</sup></b>  |  |  |  |  |  |  |  | Open label. Higher attrition in the exenatide arm.                             |
| 13 | <b>Gallwitz, 2011<sup>*</sup></b> |  |  |  |  |  |  |  | Open label.                                                                    |
| 14 | <b>Gallwitz 2012<sup>*</sup></b>  |  |  |  |  |  |  |  | Open label. Greater than 20% attrition. Higher attrition in the exenatide arm. |
| 15 | <b>Gao, 2009<sup>□</sup></b>      |  |  |  |  |  |  |  |                                                                                |
| 16 | <b>Garber, 2009<sup>□</sup></b>   |  |  |  |  |  |  |  | Greater than 20% attrition.                                                    |
| 17 | <b>Gill, 2010</b>                 |  |  |  |  |  |  |  |                                                                                |
| 18 | <b>Heine, 2005<sup>*</sup></b>    |  |  |  |  |  |  |  | Open label. Higher attrition in the exenatide arm.                             |
| 19 | <b>Kadowaki,<sup>*</sup> 2009</b> |  |  |  |  |  |  |  |                                                                                |
| 20 | <b>Kendall, 2005</b>              |  |  |  |  |  |  |  |                                                                                |

|    |                                   |  |  |  |  |  |  |  |                                                                                                                                     |
|----|-----------------------------------|--|--|--|--|--|--|--|-------------------------------------------------------------------------------------------------------------------------------------|
| 21 | Kim, 2007                         |  |  |  |  |  |  |  |                                                                                                                                     |
| 22 | Liutkus, 2010*                    |  |  |  |  |  |  |  |                                                                                                                                     |
| 23 | Marre, 2009                       |  |  |  |  |  |  |  | Higher attrition in the placebo arm. Restriction of glimipiride and rosiglitazone in some countries precluded maximal dose regimes. |
| 24 | Moretto, 2008                     |  |  |  |  |  |  |  | Diet and exercise regimes not standardised.                                                                                         |
| 25 | Nauck, 2007 <sup>□</sup>          |  |  |  |  |  |  |  | Open label.                                                                                                                         |
| 26 | Nauck, 2009 <sup>□</sup>          |  |  |  |  |  |  |  | Higher attrition in Liraglutide 1.8 mg and placebo arms.                                                                            |
| 27 | Pratley, 2010                     |  |  |  |  |  |  |  | Open label, but statistician was masked to the allocation.                                                                          |
| 28 | Russell-Jones, 2009* <sup>□</sup> |  |  |  |  |  |  |  | Insulin glargine arm-open label.                                                                                                    |
| 29 | Russell-Jones 2012 <sup>□</sup>   |  |  |  |  |  |  |  |                                                                                                                                     |
| 30 | Yang, 2011                        |  |  |  |  |  |  |  | Higher attrition in the liraglutide groups.                                                                                         |

1  
2  
3  
4  
5  
6  
7  
8  
9  
10  
11  
12  
13  
14  
15  
16  
17  
18  
19  
20  
21  
22  
23  
24  
25  
26  
27  
28  
29  
30  
31  
32  
33  
34  
35  
36  
37  
38  
39  
40  
41  
42  
43  
44  
45  
46  
47  
48  
49

1  
2  
3  
4  
5  
6  
7  
8  
9  
10  
11  
12  
13  
14  
15  
16  
17  
18  
19  
20  
21  
22  
23  
24  
25  
26  
27  
28  
29  
30  
31  
32  
33  
34  
35  
36  
37  
38  
39  
40  
41  
42  
43  
44  
45  
46  
47  
48  
49

|    |              |                                                                                   |                                                                                   |                                                                                   |                                                                                   |                                                                                   |                                                                                     |                                                                                     |                                                                  |
|----|--------------|-----------------------------------------------------------------------------------|-----------------------------------------------------------------------------------|-----------------------------------------------------------------------------------|-----------------------------------------------------------------------------------|-----------------------------------------------------------------------------------|-------------------------------------------------------------------------------------|-------------------------------------------------------------------------------------|------------------------------------------------------------------|
| 31 | Zinman, 2007 |  |  |  |  |  |  |  | Greater than 20% attrition. Higher attrition in exenatide group. |
| 32 | Zinman, 2009 |  |  |  |  |  |  |  | Greater than 20% attrition. Higher attrition in placebo group.   |

\* Open label;  method of randomisation/allocation concealment consisted of a computer random-number generator and voice-response or telephone system;  permuted block randomisation;  $\neq$  randomised according to baseline biochemical values or background pharmacological agent;  $\pounds$  randomised according to coded envelopes designed by a statistician  high risk;  low risk;  unclear risk.

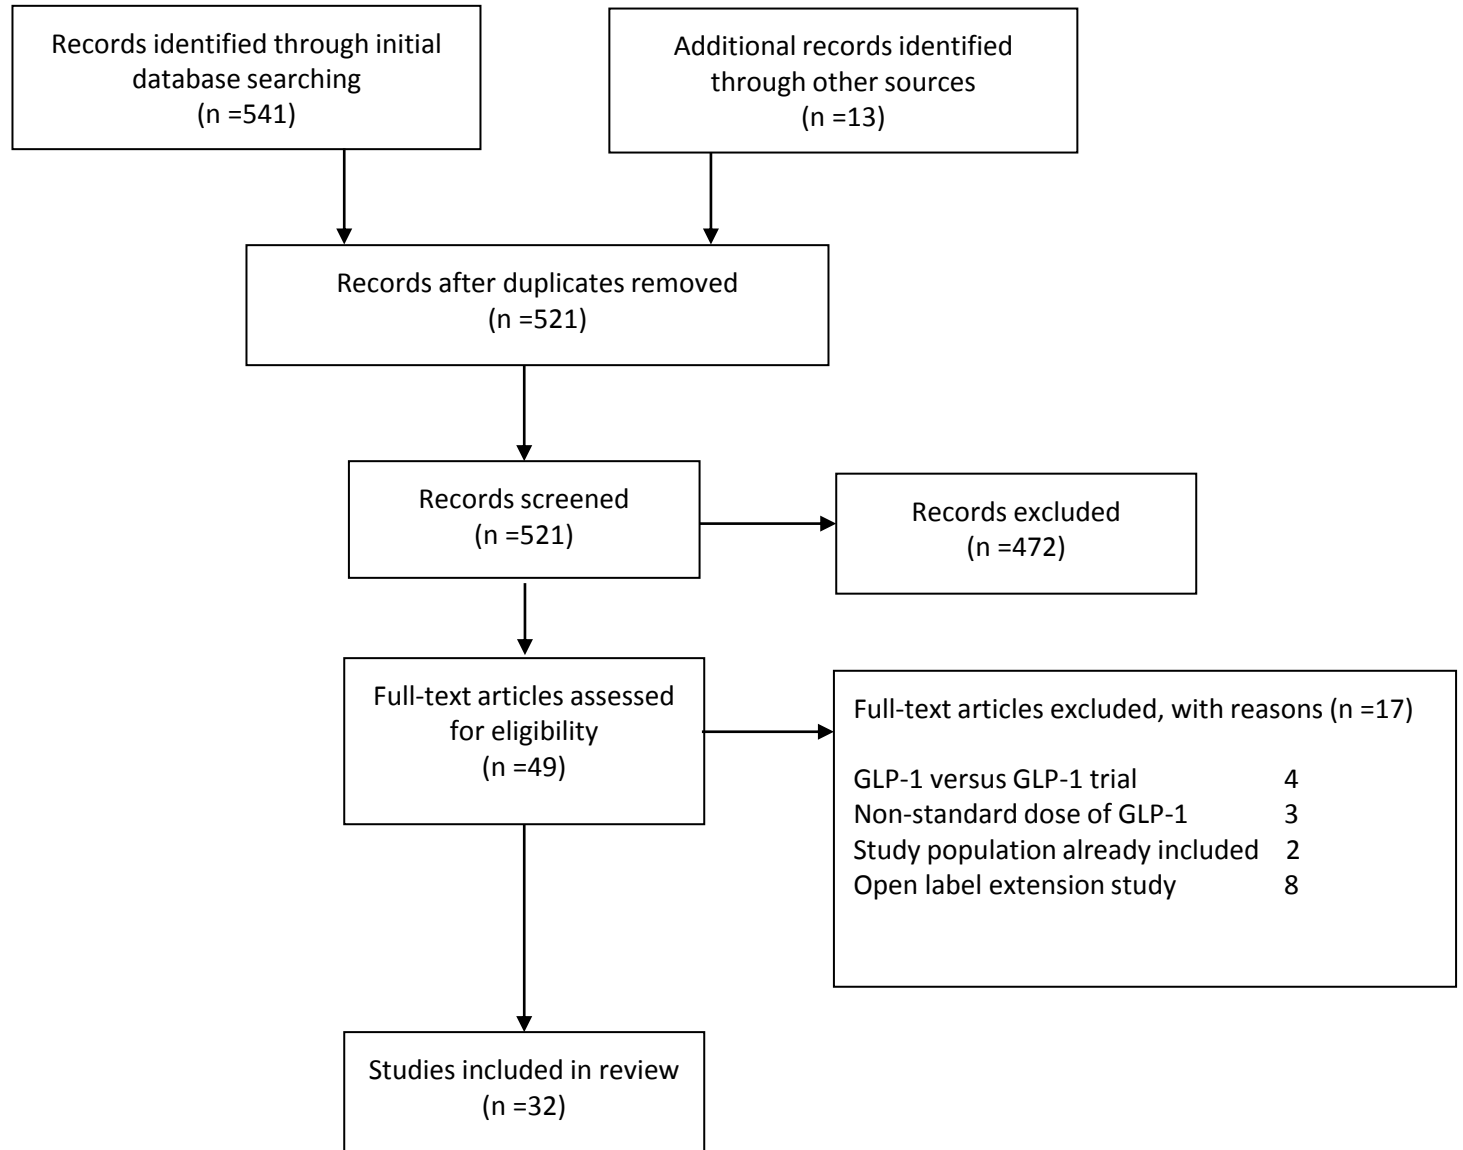

## Figure 2 Effect of liraglutide on heart rate in patients with type 2 diabetes

### 2(a) Liraglutide versus placebo

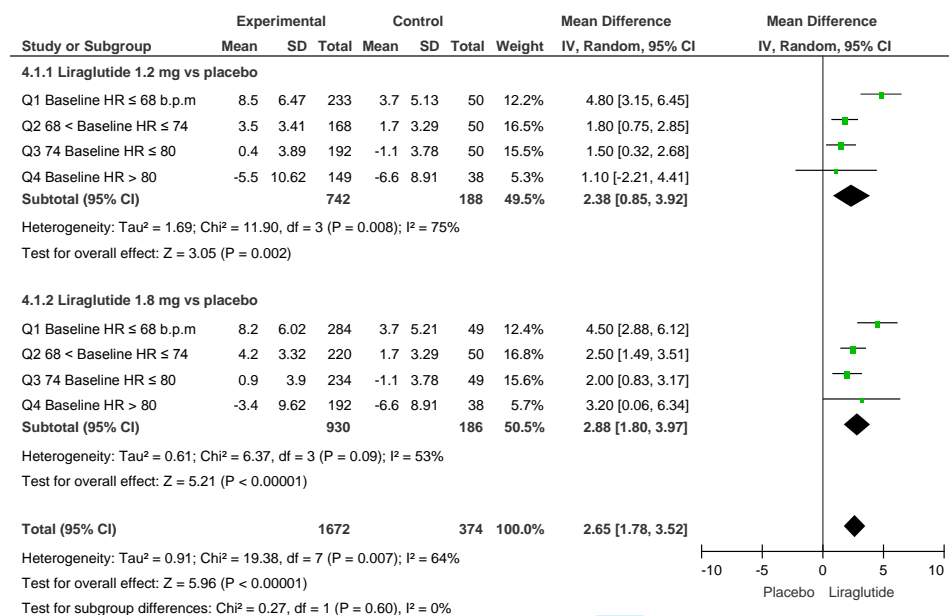

### 2(b) Liraglutide versus active control

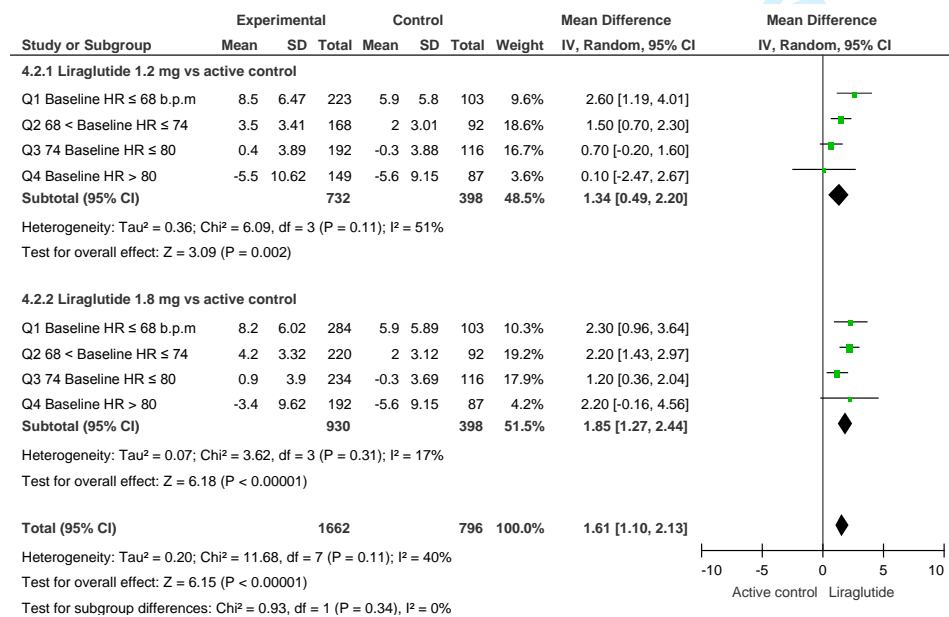

Figure 3 Effect of exenatide on heart rate in patients with type 2 diabetes

3(a) Exenatide versus placebo

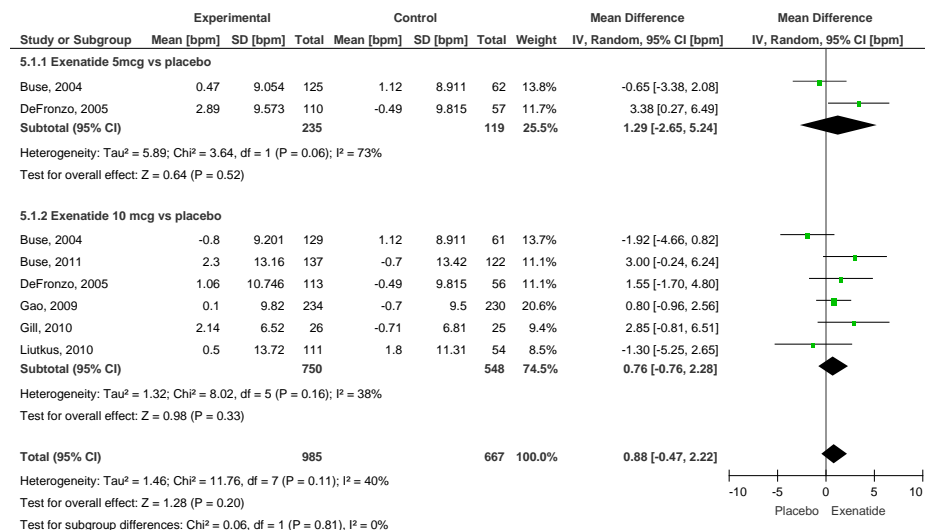

3(b) Exenatide versus active control

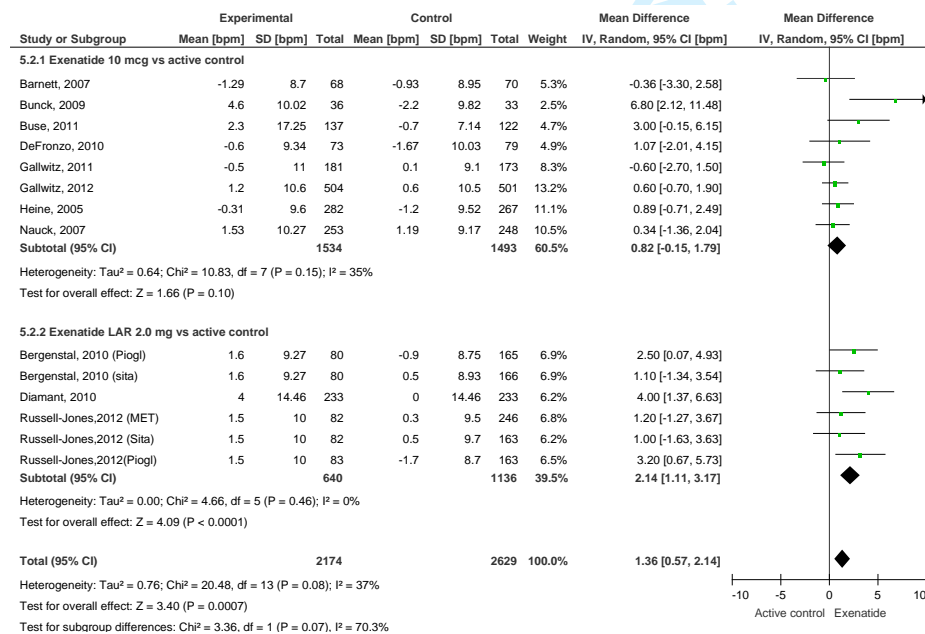

## Figure 4 GLP-1 agonists' effect on systolic blood pressure in patients with type 2 diabetes

### 4(a) GLP-1 vs placebo

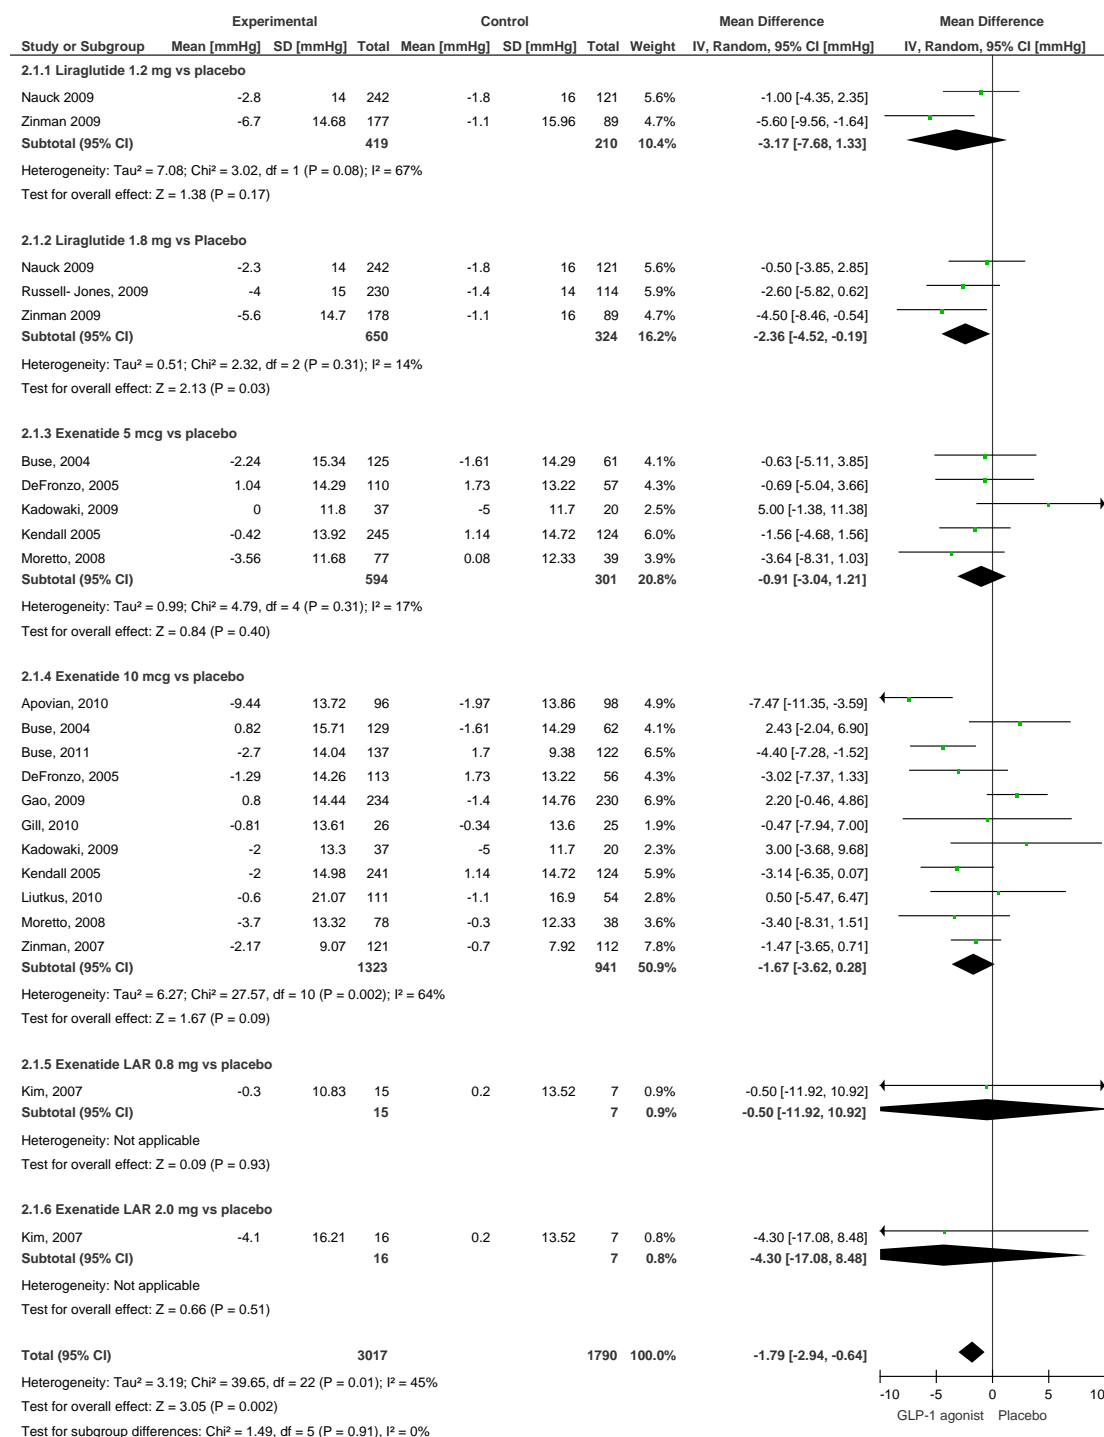



4(b) GLP-1 vs active control

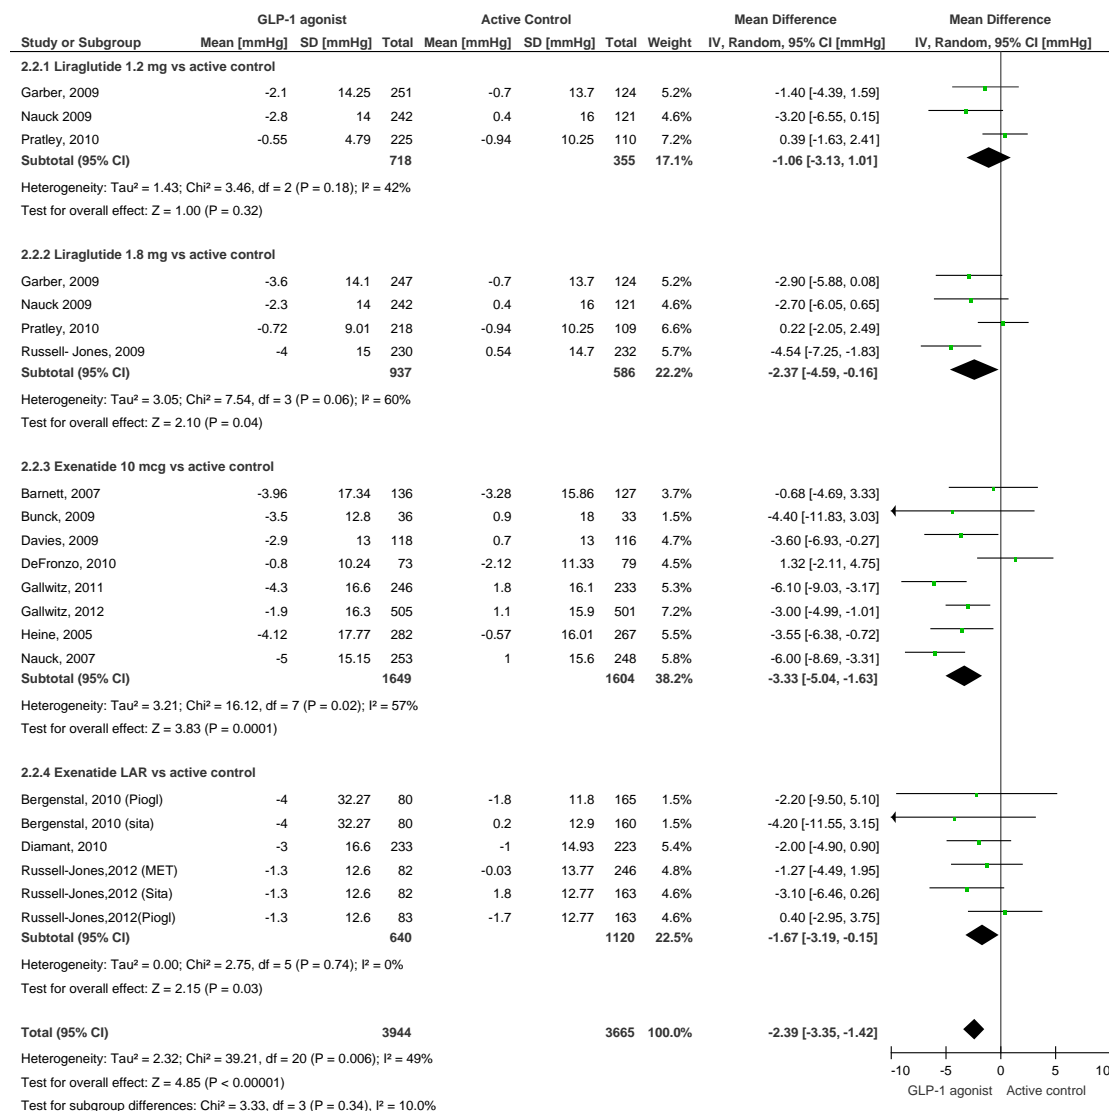

**Figure 5 GLP-1 agonists' effect on diastolic blood pressure in patients with type 2 diabetes**

**5(a) GLP-1 vs placebo**

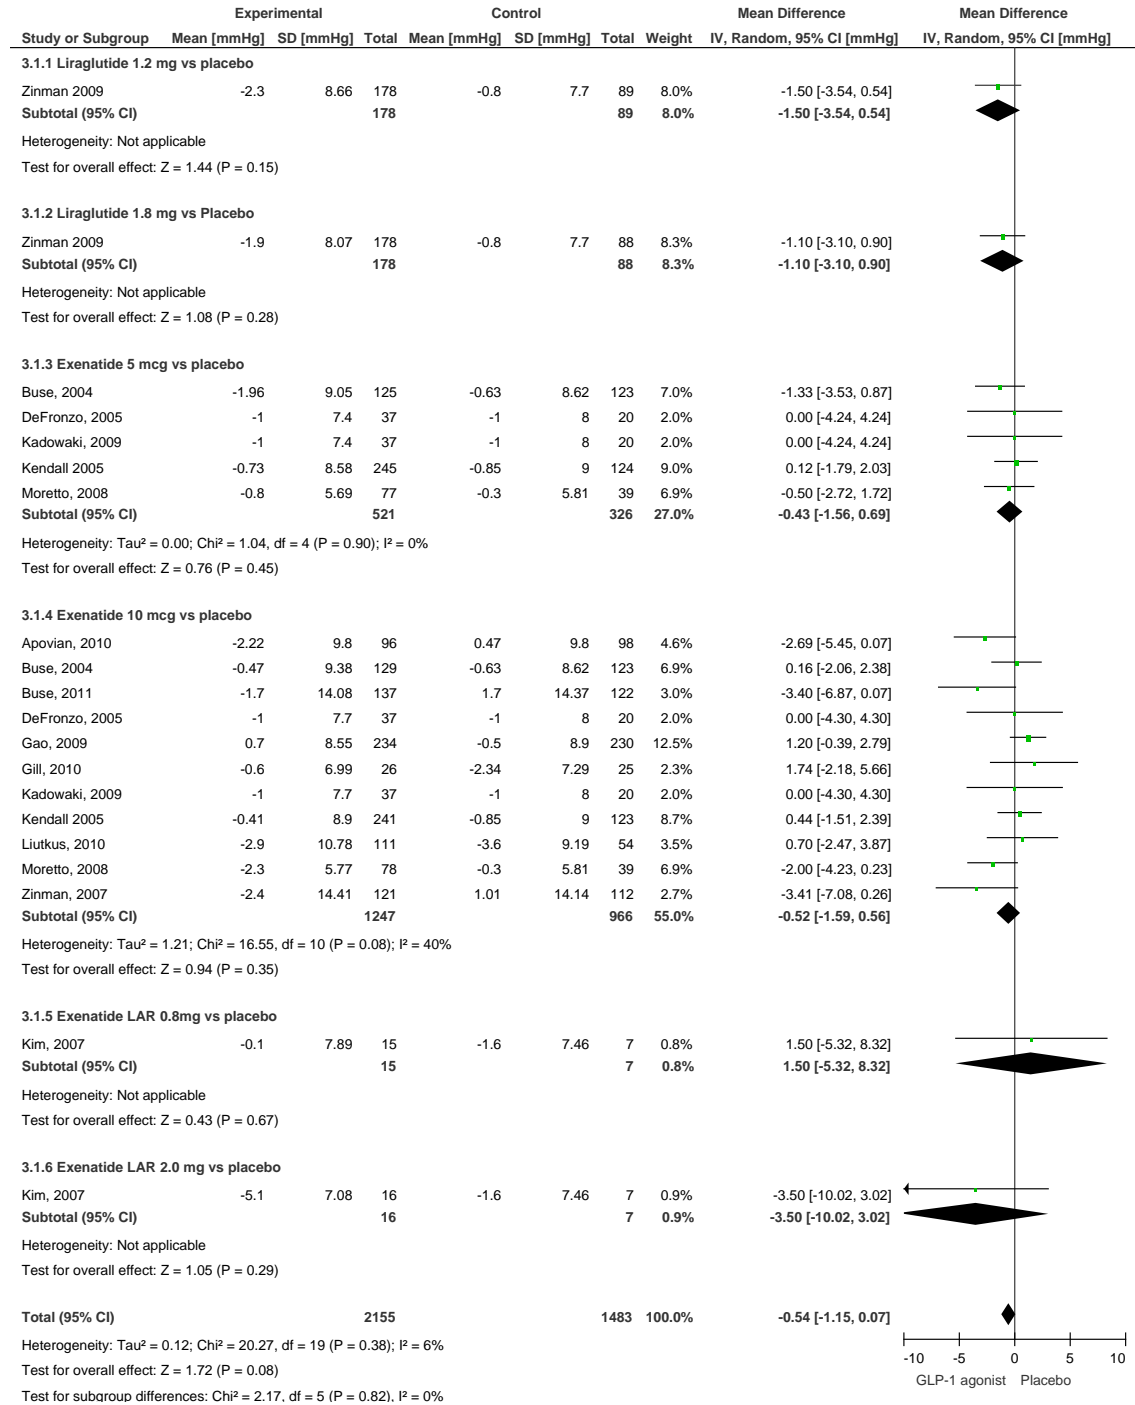

5(b) GLP-1 vs active control

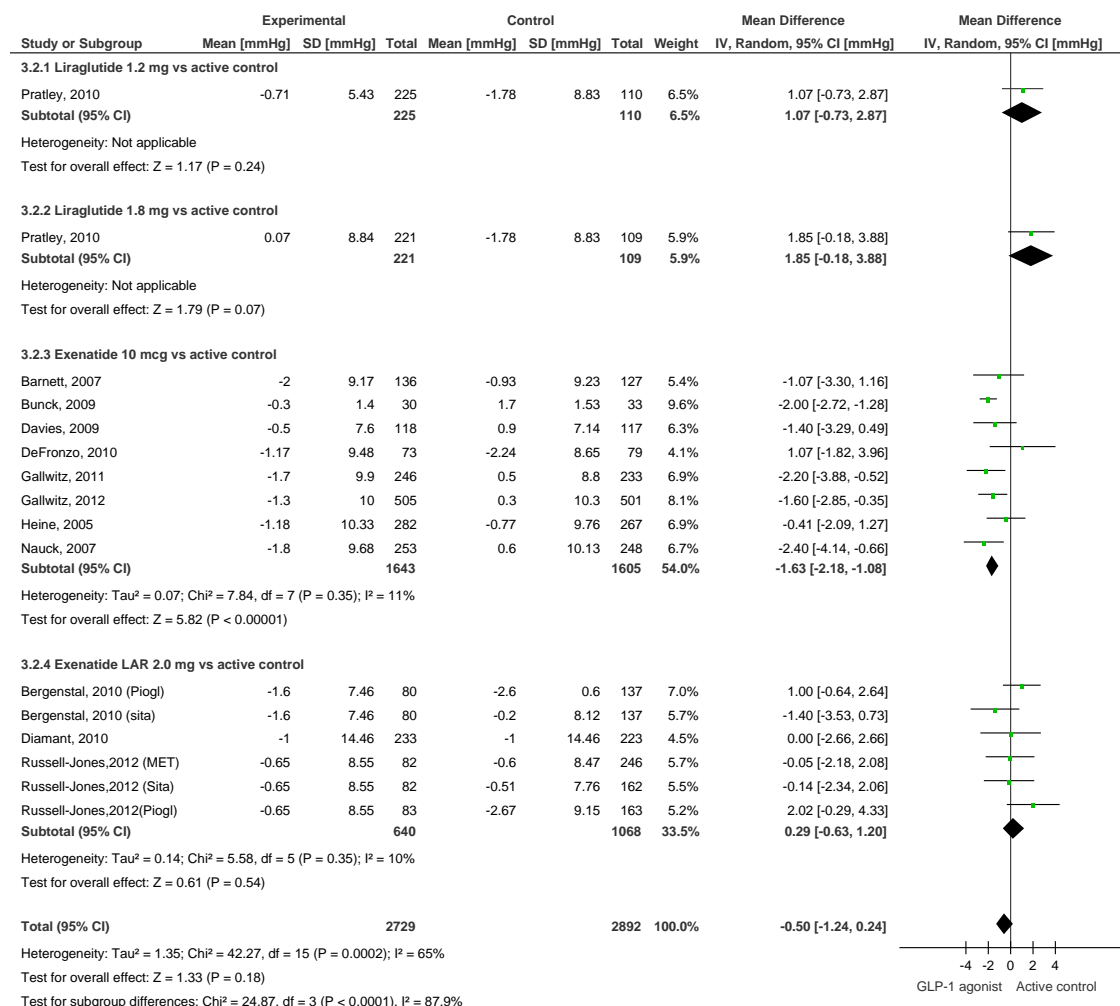

Figure 6 GLP-1 agonists' effects on body weight

6(a) GLP-1 agonists versus placebo

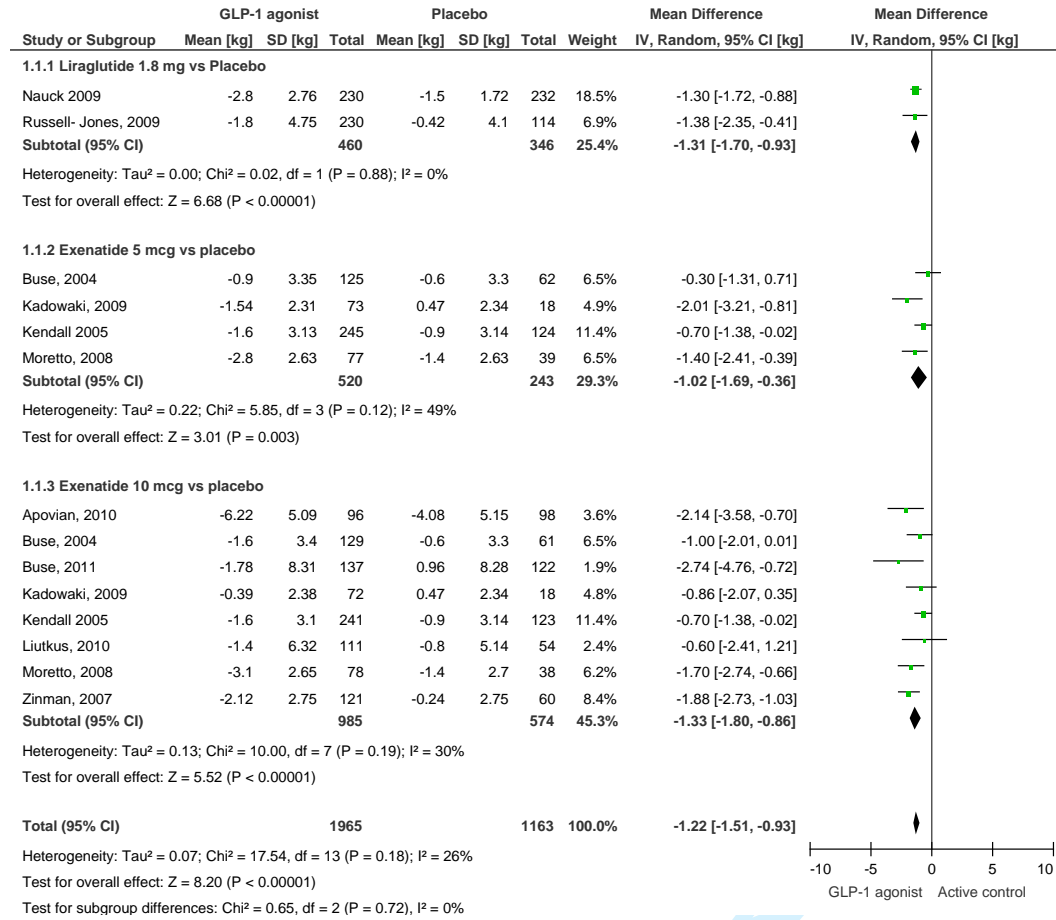

n only

6(b) GLP-1 agonists versus active control

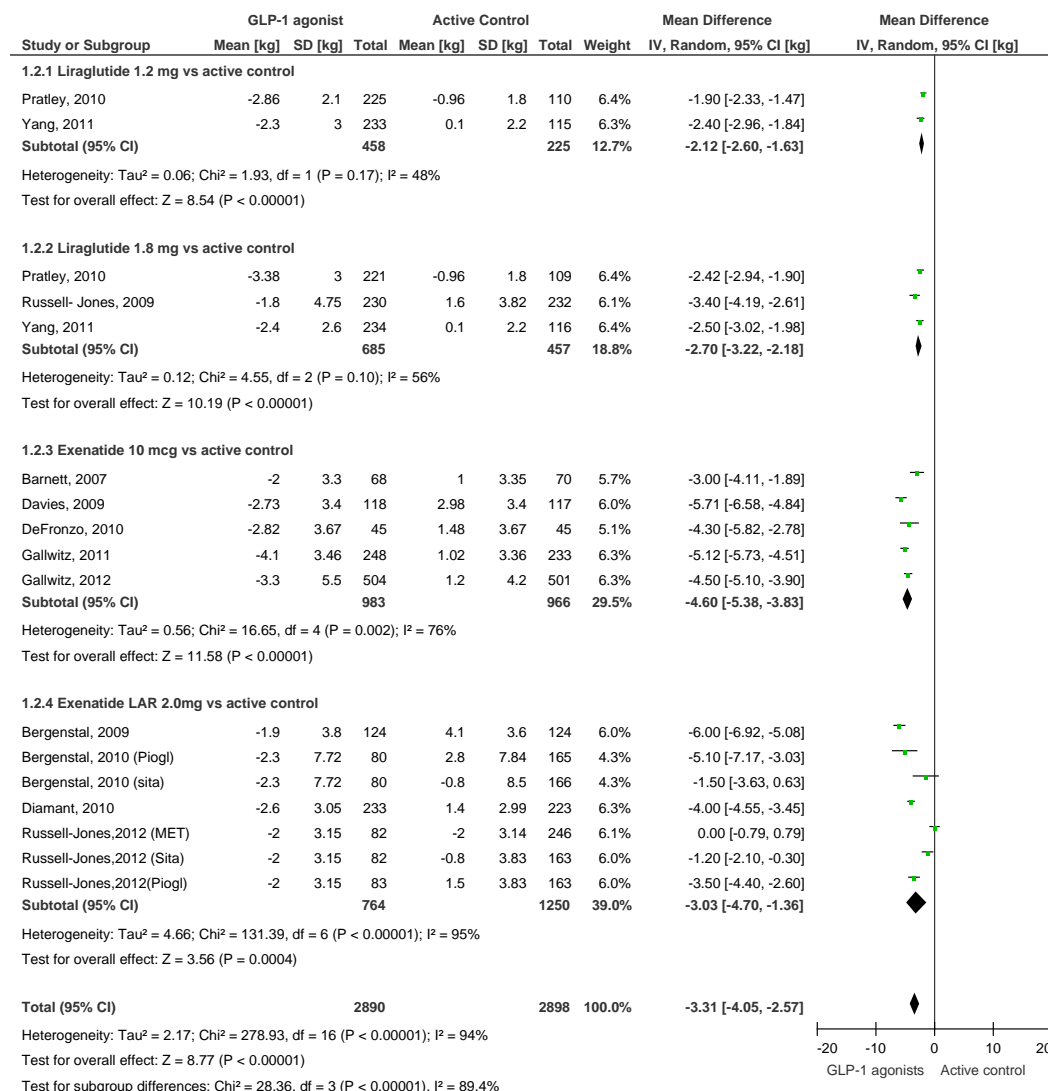

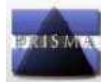

# PRISMA 2009 Checklist

| Section/topic                      | #  | Checklist item                                                                                                                                                                                                                                                                                              | Reported on page # |
|------------------------------------|----|-------------------------------------------------------------------------------------------------------------------------------------------------------------------------------------------------------------------------------------------------------------------------------------------------------------|--------------------|
| <b>TITLE</b>                       |    |                                                                                                                                                                                                                                                                                                             |                    |
| Title                              | 1  | Identify the report as a systematic review, meta-analysis, or both.                                                                                                                                                                                                                                         | 1                  |
| <b>ABSTRACT</b>                    |    |                                                                                                                                                                                                                                                                                                             |                    |
| Structured summary                 | 2  | Provide a structured summary including, as applicable: background; objectives; data sources; study eligibility criteria, participants, and interventions; study appraisal and synthesis methods; results; limitations; conclusions and implications of key findings; systematic review registration number. | 2                  |
| <b>INTRODUCTION</b>                |    |                                                                                                                                                                                                                                                                                                             |                    |
| Rationale                          | 3  | Describe the rationale for the review in the context of what is already known.                                                                                                                                                                                                                              | 4-5                |
| Objectives                         | 4  | Provide an explicit statement of questions being addressed with reference to participants, interventions, comparisons, outcomes, and study design (PICOS).                                                                                                                                                  | 5-6                |
| <b>METHODS</b>                     |    |                                                                                                                                                                                                                                                                                                             |                    |
| Protocol and registration          | 5  | Indicate if a review protocol exists, if and where it can be accessed (e.g., Web address), and, if available, provide registration information including registration number.                                                                                                                               | N/A                |
| Eligibility criteria               | 6  | Specify study characteristics (e.g., PICOS, length of follow-up) and report characteristics (e.g., years considered, language, publication status) used as criteria for eligibility, giving rationale.                                                                                                      | 5-6                |
| Information sources                | 7  | Describe all information sources (e.g., databases with dates of coverage, contact with study authors to identify additional studies) in the search and date last searched.                                                                                                                                  | 5                  |
| Search                             | 8  | Present full electronic search strategy for at least one database, including any limits used, such that it could be repeated.                                                                                                                                                                               | 5                  |
| Study selection                    | 9  | State the process for selecting studies (i.e., screening, eligibility, included in systematic review, and, if applicable, included in the meta-analysis).                                                                                                                                                   | 5-6                |
| Data collection process            | 10 | Describe method of data extraction from reports (e.g., piloted forms, independently, in duplicate) and any processes for obtaining and confirming data from investigators.                                                                                                                                  | 6                  |
| Data items                         | 11 | List and define all variables for which data were sought (e.g., PICOS, funding sources) and any assumptions and simplifications made.                                                                                                                                                                       | 6                  |
| Risk of bias in individual studies | 12 | Describe methods used for assessing risk of bias of individual studies (including specification of whether this was done at the study or outcome level), and how this information is to be used in any data synthesis.                                                                                      | 6                  |
| Summary measures                   | 13 | State the principal summary measures (e.g., risk ratio, difference in means).                                                                                                                                                                                                                               | 6                  |
| Synthesis of results               | 14 | Describe the methods of handling data and combining results of studies, if done, including measures of consistency (e.g., $I^2$ for each meta-analysis)                                                                                                                                                     | 6                  |

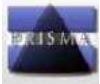

# PRISMA 2009 Checklist

Page 1 of 2

| Section/topic                 | #  | Checklist item                                                                                                                                                                                           | Reported on page #                 |
|-------------------------------|----|----------------------------------------------------------------------------------------------------------------------------------------------------------------------------------------------------------|------------------------------------|
| Risk of bias across studies   | 15 | Specify any assessment of risk of bias that may affect the cumulative evidence (e.g., publication bias, selective reporting within studies).                                                             | 6                                  |
| Additional analyses           | 16 | Describe methods of additional analyses (e.g., sensitivity or subgroup analyses, meta-regression), if done, indicating which were pre-specified.                                                         | 6                                  |
| <b>RESULTS</b>                |    |                                                                                                                                                                                                          |                                    |
| Study selection               | 17 | Give numbers of studies screened, assessed for eligibility, and included in the review, with reasons for exclusions at each stage, ideally with a flow diagram.                                          | 7, and 28 (Fig 1)                  |
| Study characteristics         | 18 | For each study, present characteristics for which data were extracted (e.g., study size, PICOS, follow-up period) and provide the citations.                                                             | 7 (citations), and 19-23 (Table 1) |
| Risk of bias within studies   | 19 | Present data on risk of bias of each study and, if available, any outcome level assessment (see item 12).                                                                                                | 7, 24-27 (Table 2)                 |
| Results of individual studies | 20 | For all outcomes considered (benefits or harms), present, for each study: (a) simple summary data for each intervention group (b) effect estimates and confidence intervals, ideally with a forest plot. | 29-36 (Figs 2-6)                   |
| Synthesis of results          | 21 | Present results of each meta-analysis done, including confidence intervals and measures of consistency.                                                                                                  | 29-36 (Figs 2-6)                   |
| Risk of bias across studies   | 22 | Present results of any assessment of risk of bias across studies (see Item 15).                                                                                                                          | 7                                  |
| Additional analysis           | 23 | Give results of additional analyses, if done (e.g., sensitivity or subgroup analyses, meta-regression [see Item 16]).                                                                                    | 29-36 (Figs 2-6)                   |
| <b>DISCUSSION</b>             |    |                                                                                                                                                                                                          |                                    |
| Summary of evidence           | 24 | Summarize the main findings including the strength of evidence for each main outcome; consider their relevance to key groups (e.g., healthcare providers, users, and policy makers).                     | 8                                  |
| Limitations                   | 25 | Discuss limitations at study and outcome level (e.g., risk of bias), and at review-level (e.g., incomplete retrieval of identified research, reporting bias).                                            | 8                                  |
| Conclusions                   | 26 | Provide a general interpretation of the results in the context of other evidence, and implications for future research.                                                                                  | 8-9                                |
| <b>FUNDING</b>                |    |                                                                                                                                                                                                          |                                    |
| Funding                       | 27 | Describe sources of funding for the systematic review and other support (e.g., supply of data); role of funders for the systematic review.                                                               | 9                                  |

From: Moher D, Liberati A, Tetzlaff J, Altman DG, The PRISMA Group (2009). Preferred Reporting Items for Systematic Reviews and Meta-Analyses: The PRISMA Statement. PLoS Med 6(6): e1000097. doi:10.1371/journal.pmed1000097

For more information, visit: [www.prisma-statement.org](http://www.prisma-statement.org)  
 For peer review only - <http://bmjopen.bmj.com/site/about/guidelines.xhtml>

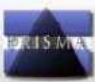

# PRISMA 2009 Checklist

- 1
- 2
- 3
- 4
- 5
- 6
- 7
- 8
- 9
- 10
- 11
- 12
- 13
- 14
- 15
- 16
- 17
- 18
- 19
- 20
- 21
- 22
- 23
- 24
- 25
- 26
- 27
- 28
- 29
- 30
- 31
- 32
- 33
- 34
- 35
- 36
- 37
- 38
- 39
- 40
- 41
- 42
- 43
- 44
- 45
- 46
- 47
- 48
- 49

For peer review only





**Effects of exenatide and liraglutide on heart rate, blood pressure and body weight: Systematic review and meta-analysis**

|                                 |                                                                                                                                                                                                                                                                                                                                            |
|---------------------------------|--------------------------------------------------------------------------------------------------------------------------------------------------------------------------------------------------------------------------------------------------------------------------------------------------------------------------------------------|
| Journal:                        | <i>BMJ Open</i>                                                                                                                                                                                                                                                                                                                            |
| Manuscript ID:                  | bmjopen-2012-001986.R1                                                                                                                                                                                                                                                                                                                     |
| Article Type:                   | Research                                                                                                                                                                                                                                                                                                                                   |
| Date Submitted by the Author:   | 15-Nov-2012                                                                                                                                                                                                                                                                                                                                |
| Complete List of Authors:       | Robinson, Louise; University of Warwick, Warwick Medical School<br>Holt, Tim; Oxford University, Department of Primary Care Health Sciences<br>Rees, Karen; University of Warwick, Warwick Medical School<br>Randeve, Harpal; University of Warwick, Warwick Medical School<br>O'Hare, Paul; University of Warwick, Warwick Medical School |
| <b>Primary Subject Heading</b>: | Diabetes and endocrinology                                                                                                                                                                                                                                                                                                                 |
| Secondary Subject Heading:      | Cardiovascular medicine, Pharmacology and therapeutics                                                                                                                                                                                                                                                                                     |
| Keywords:                       | Physiology < BASIC SCIENCES, General diabetes < DIABETES & ENDOCRINOLOGY, Diabetes & endocrinology < INTERNAL MEDICINE, THERAPEUTICS, Adult cardiology < CARDIOLOGY                                                                                                                                                                        |
|                                 |                                                                                                                                                                                                                                                                                                                                            |

SCHOLARONE™  
Manuscripts

1  
2  
3  
4  
5  
6  
7  
8  
9  
10  
11  
12  
13

# Effects of exenatide and liraglutide on heart rate, blood pressure and body weight: Systematic review and meta-analysis

14 Louise E. Robinson, MRes<sup>1</sup>

15 Tim A. Holt, PhD MRCP FRCGP<sup>1,2</sup>

16 Karen Rees, PhD<sup>1</sup>

17 Harpal S. Randeva, PhD FRCP<sup>1</sup>

18 Joseph P. O'Hare MD FRCP<sup>1</sup>

19  
20  
21  
22  
23  
24  
25  
26  
27  
28  
29  
30  
31  
32  
33  
34  
35  
36  
37  
38  
39  
40  
41  
42  
43  
44  
45  
46  
47

<sup>1</sup> Warwick Medical School, University of Warwick, Gibbet Hill Rd, Coventry CV4 7AL, UK

<sup>2</sup> Department of Primary Care Health Sciences, University of Oxford, Radcliffe Observatory Quarter Woodstock Road, Oxford, OX2 6GG, UK

## Corresponding author:

34 Dr Tim A. Holt  
35 NIHR Academic Clinical Lecturer  
36 Department of Primary Care Health Sciences  
37 University of Oxford  
38 Radcliffe Observatory Quarter  
39 Woodstock Road  
40 Oxford OX2 6GG  
41 United Kingdom  
42 Tel: 01865 289281  
43 Fax: 01865 289287  
44 Email: [tim.holt@phc.ox.ac.uk](mailto:tim.holt@phc.ox.ac.uk)

48  
49  
50  
51

**Key MeSH terms:** Diabetes Mellitus, Type 2; Glucagon-Like Peptide 1; Heart Rate; Blood Pressure; Body Weight.

52  
53  
54  
55  
56  
57  
58  
59  
60

**Word count:** 2381 words

## ABSTRACT

**Objectives:** To synthesise current evidence for the effects of exenatide and liraglutide on heart rate, blood pressure, and body weight.

**Design:** Meta-analysis of available data from randomised controlled trials comparing GLP-1 analogues with placebo, active anti-diabetic drug therapy, or lifestyle intervention.

**Participants:** Patients with type 2 diabetes.

**Outcome measures:** Weighted mean differences between trial arms for changes in heart rate, blood pressure and body weight, after a minimum of 12 weeks follow up.

**Results:** 32 trials were included. Overall, GLP-1 agonists increased heart rate by 1.86 beats per minute (bpm) [95% confidence interval (CI) 0.85, 2.87] versus placebo and 1.90 bpm [1.30, 2.50] versus active control. This effect was more evident for liraglutide and exenatide long acting release (LAR) than for exenatide BID. GLP-1 agonists decreased systolic blood pressure by -1.79mmHg [-2.94, -0.64] and -2.39mmHg [-3.35, -1.42] compared to placebo and active control respectively. Reduction in diastolic blood pressure failed to reach statistical significance (-0.54mmHg [-1.15, 0.07] vs placebo and -0.50mmHg [-1.24, 0.24] vs active control). Body weight decreased by -3.31kg [-4.05, -2.57] compared to active control but by only -1.22kg [-1.51, -0.93] compared to placebo.

**Conclusions:** GLP-1 analogues are associated with a small increase in heart rate, and modest reductions in body weight and blood pressure. Mechanisms underlying the rise in heart rate require further investigation.

## ARTICLE SUMMARY

### Article focus

- GLP-1 agonists are increasingly used in the management of type 2 diabetes, but their long term cardiovascular safety is not yet confirmed.

- These agents are known to reduce body weight and blood pressure, but are also associated with an elevation in heart rate that has not previously been quantified.

### Key messages

- Our analysis confirms the weight and blood pressure reducing effects of liraglutide and exenatide, and reports a small rise in heart rate.
- The weight reducing effects are substantially greater when compared with active control treatments than placebo, as alternative treatment options may promote weight gain.
- Heart rate rises were more evident for liraglutide than exenatide, and for exenatide long acting release (LAR) than exenatide twice daily (BID).

### Strengths and limitations

- We included unpublished data obtained from pharmaceutical companies, enabling the effects of GLP-1 agonists on heart rate to be quantified for the first time by meta-analysis.
- Our analysis is limited by significant heterogeneity between studies, and suggests the need for more detailed investigation using more accurate measurements of heart rate than those typically used in clinical practice.

## INTRODUCTION

In contrast to the weight increasing effects of several traditional anti-diabetic drug classes,[1] GLP-1 analogues have been shown to reduce both body weight and blood pressure.[2] The mechanisms producing weight loss have been extensively investigated, and involve improved satiety and reduced

1  
2  
3 calorie ingestion both through effects on the central nervous system and through delayed gastric  
4 emptying.[3-6] Those leading to reduced blood pressure are less adequately understood, but this  
5 effect has been shown to occur as early as two weeks after commencing therapy, preceding  
6 significant weight loss, suggesting that a direct hypotensive effect is at least partly responsible.[7]  
7  
8 Experimental studies of GLP-1 analogues have also reported direct effects on blood pressure,  
9 possibly via interaction with the autonomic nervous system.[8, 9]  
10  
11

12  
13 Whilst a number of studies have reported heart rate increases, the associated mechanisms are  
14 unknown, and this effect is often dismissed as clinically unimportant. Given the safety implications  
15 attributed to raised heart rate in other contexts,[10-13] there is a surprising lack of concern over its  
16 possible implications in this setting. A recent review of liraglutide by Buse acknowledges the  
17 effect,[14] but a meta-analysis on safety of incretin based therapies published in 2010 did not  
18 mention heart rate,[15] nor does an overview of the LEAD trials of liraglutide by Blonde and Russell-  
19 Jones.[16] A large nationwide audit of exenatide designed by the Association of British Clinical  
20 Diabetologists (ABCD) did not include heart rate as an outcome, despite citing evidence for the  
21 effect in the main published report.[17] A subsequent (on-going) ABCD audit of liraglutide also aims  
22 to identify unknown safety issues but has similarly omitted heart rate from the protocol.[18]  
23  
24  
25  
26  
27  
28  
29

30  
31 GLP-1 analogues are an expanding drug class, with recent development of longer acting agents  
32 including the once weekly (LAR) form of exenatide, Bydureon. This drug has recently obtained  
33 approval from the National Institute for Health and Clinical Excellence for use in type 2 diabetes and  
34 its use is likely to increase.[19] A review of trial data from five long acting GLP-1 agonists (exenatide  
35 once weekly, tasoglutide, albiglutide, LY2189265 and CJC-1134-PC) concluded that they were more  
36 likely than shorter acting formulations to raise heart rate.[20] A more recently published study of the  
37 long acting GLP-1 agent PF-04603629 reported a substantial rise in heart rate (mean increase 23  
38 bpm at 24 hours after injection of the higher dose studied), together with a rise in diastolic blood  
39 pressure.[21]  
40  
41  
42  
43  
44  
45

46  
47 Whilst there is no evidence to date that these agents (short or long acting) increase cardiovascular  
48 event rates, safety data are limited by short follow up duration.[22] Longer term follow up is  
49 underway but will take a number of years to complete.  
50  
51

52  
53 We aimed to identify and synthesise all available heart rate data from both published and  
54 unpublished sources, to quantify the effect of GLP-1 analogues on heart rate, as well as that on  
55 blood pressure and body weight.  
56  
57  
58  
59  
60

## METHODS

### Literature searches

The following resources were systematically searched to identify completed, new or on-going controlled trials of liraglutide or exenatide: Clinical Trials Gov ([www.clinicaltrials.gov](http://www.clinicaltrials.gov)); Entertrials.co.uk; Clinicaltrialssearch.org; Centerwatch; Drugsontrial; WebMD; MEDLINE (from 1960); EMBASE (from 1960); Cochrane Library Central Register of Controlled Trials (CENTRAL). We used a search strategy to capture “exenatide”, “liraglutide” or “glucagon-like peptide-1” in any field, limited to “Randomised Controlled Trial,” “Clinical Trial,” or “Controlled Clinical Trial”. Conference proceedings (British Endocrinology Society, Diabetes UK, European Association for the Study of Diabetes) and websites (American Diabetes Association, Federal Drug Agency and European Medicines Agency) were examined, and the reference lists of trials, meta-analyses and reviews were searched for further studies. Novo Nordisk and Amylin Pharmaceuticals were contacted directly to request unpublished data. The review is up to date at July 2012.

### Inclusion and exclusion criteria

#### a) Participants

We only included trials involving participants with type 2 diabetes.

#### b) Study designs

We included all randomised trials with minimum follow up of 12 weeks. We excluded ‘open-label’ extension studies of phase 3 trials.

#### c) Interventions

Trials of liraglutide (1.2 or 1.8 mg daily), exenatide (5 or 10 µg BID), or exenatide LAR, either alone or in combination with an oral anti-diabetic drug (OAD) or insulin, were included. These doses were chosen to coincide with those most commonly used in clinical practice.

#### c) Comparison groups(s)

Comparators included placebo, OAD, lifestyle intervention, or insulin.

#### d) Outcomes

We included all studies reporting heart rate, blood pressure, or body weight outcomes.

### Data extraction

1  
2  
3 Retrieved studies were assessed for inclusion by two researchers independently using the above  
4 criteria and any discrepancies were resolved by consensus. Information on the participants,  
5 intervention, comparison group, outcomes and trial quality were extracted from included studies by  
6 two researchers independently. Where necessary, clarification of data was obtained by  
7 correspondence with trial co-ordinators.  
8  
9  
10

### 11 **Risk of Bias**

12  
13  
14 We used the Cochrane tool to determine risk of selection bias (success of sequence generation and  
15 allocation concealment); performance bias (success of blinding to treatment received); detection  
16 bias (blinding of outcome assessment), attrition bias (incomplete outcome data and selective  
17 outcome reporting) and other biases.[23] Funnel plots were used to detect publication bias.  
18  
19  
20

### 21 **Analysis**

22  
23  
24 Means and standard deviations for baseline and outcome values for blood pressure, heart rate and  
25 body weight were extracted. Mean effect data from cross-over trials were extracted at the end of  
26 the initial phase. Where standard deviations for the outcome were not available they were imputed  
27 according to Cochrane Handbook for Systematic reviews version 5.[23] Standard deviations for  
28 changes from baseline were derived where necessary to account for correlation of baseline to follow  
29 up measurements within individuals, and where the correlation coefficient could not be calculated,  
30 methods were employed as recommended by Follman et al.[24] Study results were combined using  
31 RevMan version 5.2. Heterogeneity was estimated using the  $\chi^2$ - test and  $I^2$  statistic. Fixed and  
32 random effects weighted mean difference models using the Inverse Variance technique were used  
33 to compare outcomes between study drug and comparator with 95% confidence intervals (CI).  
34 Interaction effects were evaluated using pre-specified subgroup analyses (comparing various doses  
35 of study drug to active control or placebo) and type of GLP-1 agonist (liraglutide, exenatide BID and  
36 exenatide LAR preparations). Results are described using the random effects approach due to the  
37 heterogeneity of the included studies. Analyses were stratified by active control or placebo. We  
38 compared heterogeneity measures between these subgroups and according to GLP-1 agent. We also  
39 undertook sensitivity analyses to investigate the influence of trial designs on heterogeneity  
40 measures, including the background OAD treatment common to both arms. Funnel plots were  
41 assessed for asymmetry.  
42  
43  
44  
45  
46  
47  
48  
49  
50  
51  
52  
53  
54  
55

## 56 **RESULTS**

1  
2  
3 Figure 1 describes the identification of included studies. A total of 521 articles were screened. Of  
4 these, 472 were excluded on the basis of the title or abstract being irrelevant to the aims of this  
5 review. Forty-nine studies were examined in full text. Out of these, 4 were excluded because the  
6 comparator was another form of GLP-1.[25-28] In 3 cases the doses were not as specified in our  
7 inclusion criteria,[29-31] and in a further 2 the study involved further analysis of data from trials that  
8 were already included.[32, 33] Finally, 8 were open label extension studies.[34-41] This left 32 trials  
9 included in our review (Figure 1 and Table 1).[42-73] Most studies did not report all of the outcomes  
10 of interest, or did not provide them as usable numerical data. Data were therefore obtained, where  
11 available directly from the pharmaceutical companies.  
12  
13  
14  
15  
16  
17

### 18 **Methodological quality and risk of bias**

19  
20 Results of risk of bias assessment are given in Table 2. Explanation of sequence generation and  
21 allocation concealment was adequate for all trials. In nine trials at least one arm was open-label.  
22 Attrition was adequately described and was greater than 20% in nine studies. The proportion of the  
23 intention to treat (ITT) population completing the study varied with range 65.4-99.6% and median  
24 83.7%. None of the trials were terminated prematurely. Funnel plots were broadly symmetrical with  
25 no evidence of publication bias.  
26  
27  
28  
29  
30

### 31 **Heterogeneity**

32  
33 The trials varied in terms of duration of follow up, location, type of active comparator drug, and  
34 background therapy. One study was a cross-over trial[43] and one was of prolonged follow up.[55]  
35 The mean age of participants ranged from 52.3 to 60.3 years. For most outcomes, we found  
36 significant heterogeneity (Figures 2 to 6). We therefore chose to report results using the random  
37 effects approach, although the differences between random effects and fixed effect results were  
38 very small. Heterogeneity varied significantly between comparisons. For the effect of Liraglutide on  
39 heart rate compared with placebo the  $I^2$  value was 55%. However this value reduced to 0% when the  
40 data from a single trial (LEAD-1) was withheld.  
41  
42  
43  
44  
45  
46

### 47 **Heart rate**

48  
49 A total of 22 studies provided heart rate data. GLP-1 agonists overall produce a significant increase in  
50 heart rate with weighted mean difference 1.86 beats per minute (bpm) [0.85, 2.87] versus placebo  
51 and 1.90 bpm [1.30, 2.50] versus active control. Looking at specific agents, liraglutide increases heart  
52 rate by 2.71 bpm [1.45, 3.97] versus placebo and 2.49 [1.77, 3.21] versus active control. Data from  
53 the LEAD trials of liraglutide[57, 64, 67, 69, 73] were initially provided grouped into quartiles of  
54 baseline heart rate and demonstrated significant variation in effect between these subgroups, with  
55  
56  
57  
58  
59  
60



1  
2  
3 greatest increase seen in those with lowest baseline values. Exenatide BID increased heart rate by  
4 0.82 bpm [-0.15, 1.79] versus active control and by 0.88 bpm [-0.47, 2.22] versus placebo, which did  
5 not reach statistical significance (Figure 3). Exenatide LAR produced a more significant change (2.14  
6 bpm [1.11, 3.17] versus active control) but the number of studies involving this formulation was  
7 small.  
8  
9

### 10 11 **Blood pressure**

12  
13  
14 We included 31 trials measuring blood pressure changes (Figures 4 and 5). GLP-1 agonists reduced  
15 systolic blood pressure by -1.79mmHg [-2.94, -0.64] compared to placebo and by -2.39 [-3.35, -1.42]  
16 compared to active control. Reductions in diastolic blood pressure failed to reach statistical  
17 significance, and were -0.54mmHg [-1.15, 0.07] compared to placebo and -0.50mmHg [-1.24, 0.24]  
18 compared to active control.  
19  
20  
21

### 22 23 **Body weight**

24  
25  
26 Twenty-one trials measuring changes in weight were included (Figure 6). We confirm a small but  
27 highly significant reduction in body weight as a result of GLP-1 therapy. Weight changed by -3.31kg [-  
28 4.05, -2.57] compared to active control but by only -1.22kg [-1.51, -0.93] compared to placebo.  
29  
30

### 31 32 **DISCUSSION**

33  
34 We have confirmed and quantified the effects of liraglutide and exenatide on heart rate, blood  
35 pressure and body weight. Our analysis benefited from the inclusion of unpublished data supplied by  
36 Novo Nordisk and Amylin Pharmaceuticals, as these were often missing from published trial reports.  
37 It was limited by the significant heterogeneity of effect size measurements between individual  
38 studies. We examined pre-specified subgroups according to GLP-1 agent and type of comparator  
39 (placebo or active control). Active control treatments varied between trials and included different  
40 classes of OAD and insulins, which may explain some of the variation in measured effect. Other  
41 potential sources of heterogeneity include the characteristics of background OAD treatments  
42 common to both arms as these treatments differed between trials. For the heart rate effect of  
43 liraglutide versus placebo the heterogeneity was largely attributable to a single trial (LEAD-1), but  
44 the cause of the higher heart rate effect in this trial is unclear.  
45  
46  
47  
48  
49  
50

51  
52  
53 The weight reducing effects of these agents are a welcome contrast to the weight promoting effects  
54 of other treatment options, including sulphonylureas, thiazolidinediones, and insulin. We have  
55 derived a similar effect size to a previously reported value for weight loss,[2] although our study has  
56 distinguished between placebo and active comparators, in which effects sizes differ substantially.  
57  
58  
59  
60

1  
2  
3 Together with the reduction in blood pressure, this may improve longer term cardiovascular risk.  
4 However, the small rise in heart rate is a reason for caution, as it might potentially be associated  
5 with adverse outcomes. This rise was more evident for liraglutide than exenatide BID, but exenatide  
6 LAR may produce a greater response than the BID formulation. The clinical significance of this heart  
7 rate rise is still unknown from the perspective of cardiovascular risk.  
8  
9

10  
11 For most GLP-1 trials, heart rate is a secondary outcome measured as part of safety assessment, and  
12 is reported inconsistently. In clinic it is often measured using a very short sampling interval (perhaps  
13 one minute of data). One study was designed specifically to examine the effects of exenatide BID on  
14 change in heart rate as the primary outcome using 24 hour ambulatory monitoring.[58] The mean  
15 change from baseline at 12 weeks was 2.1 bpm for exenatide BID and -0.7 bpm for placebo. The  
16 sample size (54 randomised participants) in this pilot study was relatively small and the difference  
17 was not significant ( $p=0.16$ ), but is similar to the values we have obtained generally for GLP-1  
18 agonists in our meta-analysis. Measurement of heart rate using this 24-hour technique (compared  
19 with a traditional heart rate measurement in clinic) substantially improves the accuracy of  
20 measurement as heart rate is very variable within the individual. This technique could be used as a  
21 basis for a larger study powered to detect such a difference and to investigate the influence of  
22 alternative background medications..  
23  
24  
25  
26  
27  
28  
29  
30  
31

32 This review highlights the need to improve our understanding of the physiological mechanisms  
33 through which GLP-1 agonists act, whilst the results of longer term safety studies are awaited. Both  
34 autonomic nervous system-dependent and -independent effects have been suggested in animal  
35 studies as a basis for the rise in heart rate.[74, 75] The heart rate response in the presence or  
36 absence of autonomic neuropathy in human patients might therefore justify further study. There is  
37 also a clear need to improve the comprehensive reporting of all outcome data measured during  
38 clinical trials of anti-diabetic agents, particularly those relevant to cardiovascular risk.  
39  
40  
41  
42  
43  
44  
45  
46

#### 47 **ACKNOWLEDGEMENTS**

48  
49 We would like to thank Amylin Pharmaceuticals and Novo Nordisk for providing us with unpublished  
50 data for this meta-analysis.  
51

#### 52 **CONTRIBUTORSHIP STATEMENT**

1  
2  
3 LR, PO'H and HR were involved in the design and conception of the study. LR and TH conducted the  
4 bibliographic searches, identified the included papers, and extracted the data independently. KR  
5 advised on methodological issues. All authors were involved in drafting the manuscript.  
6  
7

#### 8 9 **ETHICAL APPROVAL**

10  
11 None required.  
12

#### 13 14 **FUNDING STATEMENT**

15  
16 This research received no specific grant from any funding agency in the public, commercial or not-  
17 for-profit sectors.  
18

#### 19 20 **COMPETING INTERESTS**

21  
22 LR, TH and KR have no interests to declare. PO'H and HR have received research funding (paid to  
23 Warwick Medical School) from Novo Nordisk, and payments for speaking from Novo Nordisk.  
24

#### 25 26 **DATA SHARING**

27  
28 All data used in this study are freely available by request to the corresponding author Dr Tim A. Holt.  
29

#### 30 31 **REFERENCES**

- 32  
33  
34 1. Nathan DM, Buse JB, Davidson MB, et al. Medical management of hyperglycemia in type 2  
35 diabetes: A consensus algorithm for the initiation and adjustment of therapy. *Diabetes Care*  
36 2009;**32**:193–203.  
37  
38 2. Vilsboll T, Christensen M, Junker AE, et al. Effects of glucagon-like peptide receptor agonists on  
39 weight loss: systematic review and meta-analyses of randomized controlled trials. *BMJ*  
40 2012;**344**:1-11.  
41  
42 3. Flint A, Raben A, Astrup A, Holst JJ. Glucagon-like peptide 1 promotes satiety and suppresses  
43 energy intake in humans. *J Clin Invest* 1998;**101**:515–520.  
44  
45 4. MacDonald PE, El-kholy W, Riedel MJ, et al. The multiple actions of GLP-1 on the process of  
46 glucose-stimulated insulin secretion. *Diabetes* 2002;**51**(Suppl. 3):S434–S442.  
47  
48  
49  
50  
51  
52  
53  
54  
55  
56  
57  
58  
59  
60

- 1  
2  
3 5. Willms B, Werner J, Holst JJ, et al. Gastric emptying, glucose responses, and insulin secretion  
4 after a liquid test meal: effects of exogenous glucagon-like peptide-1 (GLP-1)-(7-36) amide in  
5 type 2 (noninsulin-dependent) diabetic patients. *J Clin Endocrinol Metab* 1996;**81**:327-332.  
6  
7
- 8  
9 6. Meier JJ, Nauck MA. Glucagon-like peptide 1(GLP-1) in biology and pathology. *Diabetes Metab*  
10 *Res Rev* 2005;**21**:91–117.  
11
- 12  
13 7. Varanasi A, Chaudhuri A, Dhindsa S, et al. Durability of effects of exenatide on glycaemic  
14 control, body weight, systolic blood pressure, C-reactive protein and triglyceride concentrations.  
15 *Endocrin Prac* 2011;**17**:192-200.  
16  
17
- 18  
19 8. Bojanowska E, Stempniak B. Effects of glucagon-like peptide-1 (7-36) amide on  
20 neurohypophysial hormone secretion induced by acute hyperosmotic challenge. *Neuropeptides*  
21 2003;**37**:45-50.  
22  
23
- 24  
25 9. Bharucha AE, Charkoudian N, Andrews CN, et al. Effects of glucagon-like peptide-1, yohimbine,  
26 and nitrenergic modulation on sympathetic and parasympathetic activity in humans. *Am J Physiol*  
27 *Regul Integr Comp Physiol* 2008;**295**:R874–R880.  
28  
29
- 30  
31 10. Levine HJ . Rest heart rate and life expectancy. *J Am Coll Cardiol* 1997;**30**:1104-6.  
32  
33
- 34  
35 11. Aronow WS, Ahn C, Mercado AD, et al. Association of average heart rate on 24-hour  
36 ambulatory electrocardiograms with incidence of new coronary events at 48-month follow-up in  
37 1311 patients (mean age 81 years) with heart disease and sinus rhythm. *Am J Cardiol* 1996;**78**:  
38 1175–6.  
39  
40
- 41  
42 12. Hozawa A, Ohkubo T, Kikuya M, et al. Prognostic value of home heart rate for cardiovascular  
43 mortality in the general population: the Ohasama study. *Am J Hypertens* 2004;**17**:1005–10.  
44  
45
- 46  
47 13. Anselmino M, Öhrvik J, Rydén L. Resting heart rate in patients with stable coronary artery  
48 disease and diabetes: a report from the euro heart survey on diabetes and the heart. *Eur Heart J*  
49 2010;**31**:3040-5.  
50  
51
- 52  
53 14. Bode B. An overview of the pharmacokinetics, efficacy and safety of liraglutide. *Diab Res Clin*  
54 *Pract* 2012;**97**:27-42.  
55  
56  
57  
58  
59  
60

- 1  
2  
3 15. Fakhoury WKH, Lereun C, Wright D. A meta-analysis of placebo-controlled clinical trials assessing  
4 the efficacy and safety of incretin- based medications in patients with type 2 diabetes.  
5 Pharmacol 2010;**86**:44-57.  
6  
7
- 8  
9 16. Blonde L, Russell-Jones D. The safety and efficacy of liraglutide with or without oral antidiabetic  
10 drug therapy in type 2 diabetes: an overview of the LEAD 1-5 studies. Diabetes Obes Metab  
11 2009;**11**(Suppl 3):26-34.  
12  
13
- 14 17. Ryder REJ, Thong KY, Cull ML, et al, on behalf of the ABCD nationwide exenatide audit  
15 contributors. The Association of British Clinical Diabetologists (ABCD) nationwide exenatide  
16 audit. Practical Diabetes Int 2010;**27**:352–357.  
17  
18
- 19 18. [http://www.diabetologists-abcd.org.uk/Objectives\\_Liraglutide\\_Audit.htm](http://www.diabetologists-abcd.org.uk/Objectives_Liraglutide_Audit.htm) (accessed 18<sup>th</sup> April  
20 2012)  
21  
22
- 23 19. National Institute for Health and Clinical Excellence. Technology Appraisal TA248. Exenatide  
24 prolonged-release suspension for injection in combination with oral antidiabetic therapy for the  
25 treatment of type 2 diabetes. London, NICE, 2012.  
26  
27
- 28 20. Madsbad S, Kielgast U, Asmar M, et al. An overview of once-weekly glucagon-like peptide-1  
29 receptor agonists - available efficacy and safety data and perspectives for the future. Diabetes,  
30 Obesity and Metabolism 2011;**13**:394-407.  
31  
32
- 33 21. Gustavson SM, Chen D, Somayaji V, et al. Effects of a long-acting GLP-1 mimetic (PF-04603629)  
34 on pulse rate and diastolic blood pressure in patients with type 2 diabetes mellitus. Diabetes,  
35 Obesity and Metabolism 2011;**13**:1056–58.  
36  
37
- 38 22. Ratner R, Han J, Nicewarner D, Yushmanova I, et al. Cardiovascular safety of exenatide BID: an  
39 integrated analysis from controlled clinical trials in participants with type 2 diabetes. Cardiovasc  
40 Diabetol 2011;**10**:22-32.  
41  
42
- 43 23. Higgins JPT, Green S (editors). *Cochrane Handbook for Systematic Reviews of Interventions*  
44 Version 5.1.0 [updated March 2011]. The Cochrane Collaboration, 2011. Available from  
45 [www.cochrane-handbook.org](http://www.cochrane-handbook.org).  
46  
47  
48  
49  
50  
51  
52  
53  
54  
55  
56  
57  
58  
59  
60

- 1  
2  
3 24. Follman D, Elliott P, Suh I, et al. Variance imputation for overviews of clinical trials with  
4  
5 continuous response. *J Clin Epidemiol* 1992;**45**:769-73.  
6
- 7 25. Blevins T, Pullman J, Malloy J, et al. DURATION 5: Exenatide once weekly resulted in greater  
8  
9 improvements in glycemic control compared with exenatide twice daily in patients with type 2  
10  
11 diabetes. *J Clin Endocrinol Metab* 2011;**96**:1301-10.  
12
- 13 26. Buse JB, Rosenstock J, Sesti G, et al. Liraglutide once a day versus exenatide twice a day for type  
14  
15 2 diabetes: a 26- week randomised, parallel-group, multinational, open label trial (LEAD-6).  
16  
17 *Lancet* 2009;**374**:39-47.  
18
- 19 27. Buse JB, Drucker DJ, Taylor KL, et al. DURATION-1: exenatide once weekly produces sustained  
20  
21 glycemic control and weight loss over 52 weeks. *Diabetes Care* 2010;**33**:1255–1261.  
22  
23
- 24 28. Drucker D, Buse JB, Taylor K, et al. Exenatide once- weekly versus twice daily for the treatment  
25  
26 of type 2 diabetes: a randomized open- label, non- inferiority study. *Lancet* 2008;**372**:1240-50.  
27  
28
- 29 29. Bunck MC, Diamant M, Corner A, et al. One-year treatment with exenatide improves beta-cell  
30  
31 function, compared with insulin glargine, in metformin-treated type 2 diabetic patients: a  
32  
33 randomized, controlled trial. *Diabetes Care* 2009;**32**:762-768.  
34
- 35 30. Feinglos MN, Saad MF, Pi-Sunyer FX, An B, Santiago O. Effects of liraglutide (NN2211), a long-  
36  
37 acting GLP-1 analogue, on glycaemic control and bodyweight in subjects with Type 2 diabetes.  
38  
39 *Diabet Med* 2005;**22**:1016-1023.  
40
- 41 31. Vilsboll T, Zdravkovic M, Le-Thi T, et al. Liraglutide, a long-acting human glucagon-like peptide-1  
42  
43 analog, given as monotherapy significantly improves glycemic control and lowers body weight  
44  
45 without risk of hypoglycemia in patients with type 2 diabetes. *Diabetes Care* 2007;**30**:1608-10.  
46  
47
- 48 32. Bode BW, Testa MA, Magwire M, et al. Patient-reported outcomes following treatment with the  
49  
50 human GLP-1 analogue liraglutide or glimepiride in monotherapy: results from a randomized  
51  
52 controlled trial in patients with type 2 diabetes. *Diabetes, Obesity and Metabolism* 2010;**12**:604–  
53  
54  
55 12.  
56  
57  
58  
59  
60

- 1  
2  
3 33. Davies M, Pratley R, Hammer M, et al. Liraglutide improves treatment satisfaction in people with  
4 Type 2 diabetes compared with sitagliptin, each as an add on to metformin. *Diabet Med*  
5 2011;**28**:333–337.  
6  
7  
8  
9 34. Bunck MC, Cornér A, Eliasson B, et al. One year treatment with exenatide vs. insulin glargine:  
10 effects on post-prandial glycemia, lipid profiles and oxidative stress. *Atherosclerosis* 2010;**212**:  
11 223-9.  
12  
13  
14  
15 35. Bunck MC, Cornér A, Eliasson B, et al. Effects of exenatide on measures of beta-cell function  
16 after 3 years in metformin-treated patients with type 2 diabetes. *Diabetes Care* 2011;**34**:2041-7.  
17  
18  
19  
20 36. Buse JB, Klonoff DC, Nielsen LL, et al. Metabolic effects of two years of exenatide treatment on  
21 diabetes, obesity, and hepatic biomarkers in patients with type 2 diabetes: an interim analysis of  
22 data from the open-label, uncontrolled extension of three double-blind, placebo-controlled  
23 trials. *Clin Ther* 2007;**29**:139-153.  
24  
25  
26  
27  
28 37. Klonoff DC, Buse JB, Nielsen LL, et al. Exenatide effects on diabetes, obesity, cardiovascular risk  
29 factors and hepatic biomarkers in patients with type 2 diabetes treated for at least 3 years. *Curr*  
30 *Med Res Opin* 2008;**24**:275-86.  
31  
32  
33  
34 38. Pratley R, Nauck M, Bailey T, et al. One year of liraglutide treatment offers sustained and more  
35 effective glycaemic control and weight reduction compared with sitagliptin, both in combination  
36 with metformin, in patients with type 2 diabetes: a randomised, parallel-group, open-label trial.  
37 *Int J Clin Pract* 2011;**65**:397-407.  
38  
39  
40  
41  
42 39. Ratner RE, Maggs D, Nielsen LL. et al. Long term effects of exenatide therapy over 82 weeks on  
43 glycemic control and weight in overweight metformin treated patients with type 2 diabetes  
44 mellitus. *Diab Obes Metab* 2006;**8**:419-28.  
45  
46  
47  
48  
49 40. Riddle MC, Henry RR, Poon TH, et al. Exenatide elicits sustained glycaemic control and  
50 progressive reduction of body weight in patients with type 2 diabetes inadequately controlled by  
51 sulphonylureas with or without metformin. *Diabetes Metab Res Rev* 2006;**22**:483-91.  
52  
53  
54  
55  
56  
57  
58  
59  
60

- 1  
2  
3 41. Wysham C, Bergenstal R, Malloy J, et al. DURATION-2: efficacy and safety of switching from  
4 maximum daily sitagliptin or pioglitazone to once-weekly exenatide. *Diabet Med* 2011;**28**:705-  
5 14.  
6  
7  
8  
9 42. Apovian CM, Bergenstal RM, Cuddihy RM, et al. Effects of exenatide combined with lifestyle  
10 modification in patients with type 2 diabetes. *Am J Med* 2010;**123**:468-77.  
11  
12  
13 43. Barnett AH, Burger J, Johns D, et al. Tolerability and efficacy of exenatide and titrated insulin  
14 glargine in adult patients with type 2 diabetes previously uncontrolled with metformin or a  
15 sulphonylurea: a multinational, randomised, open label two period crossover non-inferiority  
16 trial. *Clinical Therapeutics* 2007;**29**:2333-48.  
17  
18  
19 44. Bergenstal R, Lewin A, Bailey T, et al. Efficacy and safety of biphasic insulin aspart 70/30 versus  
20 exenatide in subjects with type 2 diabetes failing to achieve glycemic control with metformin  
21 and a sulphonylurea. *Curr Med Res Opin* 2009;**25**:65-75.  
22  
23  
24 45. Bergenstal RM, Wysham C, MacConell L, et al. Efficacy and safety of exenatide once weekly  
25 versus sitagliptin or pioglitazone as an adjunct to metformin for treatment of type 2 diabetes  
26 (DURATION-2): a randomised trial. *Lancet* 2010;**376**:431-9.  
27  
28  
29 46. Buse JB, Henry RR, Han J, et al. Effects of exenatide (Exendin-4) on glycaemic control over 30  
30 weeks in patients with type 2 diabetes treated with metformin and a sulphonylurea. *Diabetes*  
31 *Care* 2004;**27**:2628-35.  
32  
33  
34 47. Buse JB, Bergenstal RM, Glass LC, et al. Use of twice daily exenatide in basal insulin-treated  
35 patients with type 2 diabetes. A randomized controlled trial. *Ann Int Med* 2011;**154**:103-112.  
36  
37  
38 48. Davies MJ, Donnelly R, Barnett AH, et al. Exenatide compared with long-acting insulin to achieve  
39 glycaemic control with minimal weight gain in patients with type 2 diabetes: results of helping  
40 evaluate exenatide in patients with diabetes compared with long-acting insulin (HEELA) study.  
41 *Diabetes Obes Metab* 2009;**11**:1153-64.  
42  
43  
44  
45  
46  
47  
48  
49  
50  
51  
52  
53  
54  
55  
56  
57  
58  
59  
60



- 1  
2  
3 49. DeFronzo RA, Ratner RE, Han J, et al. Effects of exenatide (exendin-4) on glycemic control and  
4 weight over 30 weeks in metformin-treated patients with type 2 diabetes. *Diabetes Care*  
5 2005;**28**:1092-1100.  
6  
7  
8  
9  
10 50. DeFronzo RA, Triplitt C, Qu Y, et al. Effects of exenatide plus rosiglitazone on beta-cell function  
11 and insulin sensitivity in subjects with type 2 diabetes on metformin. *Diabetes Care* 2010;**33**:951-  
12 7.  
13  
14  
15  
16 51. Derosa G, Maffioli P, Salvadeo SA, et al. Exenatide vs. glibenclamide in patients with diabetes.  
17 *Diabetes Technol Therap* 2010;**12**:233-40.  
18  
19  
20 52. Derosa G, Putignano P, Bossi AC, et al. Exenatide or glimepiride added to metformin on  
21 metabolic control and on insulin resistance in type 2 diabetic patients. *Eur J Pharmacol*  
22 2011;**666**:251-6.  
23  
24  
25  
26 53. Diamant M, Gaal L, Stranks S, et al. Once weekly exenatide compared with insulin glargine  
27 titrated to target in patients with Type 2 Diabetes (DURATION 3): An open-label randomised  
28 trial. *Lancet* 2010;**375**:2234-43.  
29  
30  
31  
32  
33 54. Gallwitz B, Bohmer M, Segiet T, et al. Exenatide twice daily versus premixed insulin aspart 70/30  
34 in metformin-treated patients with type 2 diabetes: a randomized 26-week study on glycemic  
35 control and hypoglycaemia. *Diabetes Care* 2011;**34**:604-6.  
36  
37  
38  
39 55. Gallwitz B, Guzman J, Dotta F, et al. Exenatide twice daily versus glimepiride for prevention of  
40 glycaemic deterioration in patients with type 2 diabetes with metformin failure (EUREXA): an  
41 open-label, randomised controlled trial. *Lancet* 2012;**379**:2270-8.  
42  
43  
44  
45 56. Gao Y, Yoon KH, Chuang L-M, et al. Efficacy and safety of exenatide in patients of Asian descent  
46 with type 2 diabetes inadequately controlled with metformin or metformin and a sulphonylurea.  
47 *Diabetes Res Clin Pract* 2009;**83**:69-76.  
48  
49  
50  
51  
52 57. Garber A, Henry R, Ratner R, et al for the LEAD-3 (Mono) Study Group. Liraglutide versus  
53 glimepiride monotherapy for type 2 diabetes (LEAD-3 Mono): a randomised, 52-week, phase III,  
54 double-blind, parallel-treatment trial. *Lancet* 2009;**373**:473-81.  
55  
56  
57  
58  
59  
60

- 1  
2  
3 58. Gill A, Hoogwerf BJ, Burger J, et al. Effect of exenatide on heart rate and blood pressure in  
4  
5 subjects with type 2 diabetes mellitus: a double blind, placebo controlled, randomized pilot  
6  
7 study. *Cardiovasc Diabetol* 2010;**9**:6.  
8
- 9  
10 59. Heine RJ, Van Gaal LF, Johns D, et al. GWAA Study Group. Exenatide vs insulin glargine in  
11  
12 patients with suboptimally controlled type 2 diabetes: a randomised trial. *Ann Intern Med*  
13  
14 2005;**143**:559-69.  
15
- 16 60. Kadowaki T, Namba M, Yamamura A, et al. Exenatide exhibits dose-dependent effects on  
17  
18 glycemic control over 12 weeks in Japanese patients with suboptimally controlled type 2  
19  
20 diabetes. *Endocr J* 2009;**56**:415-24.  
21
- 22 61. Kendall DM, Riddle MC, Rosenstock J, et al. Effects of exenatide (Exendin-4) on glycaemic control  
23  
24 over 30 weeks in patients with type 2 diabetes treated with metformin and a sulphonylurea.  
25  
26 *Diabetes Care* 2005;**28**:1083-91.  
27
- 28 62. Kim D, MacConell L, Zhuang D, et al. Effects of once-weekly dosing of a long-acting release  
29  
30 formulation of exenatide on glucose control and body weight in subjects with type 2 diabetes.  
31  
32 *Diabetes Care* 2007;**30**:1487-93.  
33
- 34 63. Liutkus J, Guzman JR, Norwood P, et al. A placebo- controlled trial of exenatide twice-daily added  
35  
36 to thiazolidinediones alone or in combination with metformin. *Diabetes Obes Metab*  
37  
38 2010;**12**:1058-65.  
39
- 40 64. Marre M, Shaw J, Brandle M, et al. Liraglutide once-daily human GLP-1 analogue, added to a  
41  
42 sulphonylurea over 26 weeks produces greater improvements in glycaemic and weight control  
43  
44 compared with adding rosiglitazone or placebo in subjects with type 2 diabetes (Lead 1-SU).  
45  
46 *Diabet Med* 2009;**26**:268-78.  
47
- 48 65. Moretto TJ, Milton DR, Ridge TD. et al. Efficacy and tolerability of exenatide monotherapy over  
49  
50 24 weeks in antidiabetic drug-naive patients with type 2 diabetes: A randomized, double blind,  
51  
52 placebo-controlled parallel-group study. *Clinical Therapeutics* 2008;**30**:1448-60.  
53  
54  
55  
56  
57  
58  
59  
60

- 1  
2  
3 66. Nauck M A, Duran S, Kim D, et al. A comparison of twice-daily exenatide and biphasic insulin  
4 aspart in patients with type 2 diabetes who were suboptimally controlled with sulfonylurea and  
5 metformin: a non-inferiority study. *Diabetologia* 2007;**50**:259-267.  
6  
7  
8  
9  
10 67. Nauck M, Frid A, Hermansen K, et al. Efficacy and safety comparison of liraglutide, glimepiride  
11 and placebo, all in combination with metformin in type 2 diabetes. *Diabetes Care* 2009;**32**:84-90.  
12  
13 68. Pratley R E, Nauck M, Bailey T, et al. Liraglutide vs sitagliptin for patients with type 2 diabetes  
14 who did not have adequate glycemic control with metformin: a 26 week, randomised, parallel  
15 group, open- label trial. *Lancet* 2010;**375**:1447-56.  
16  
17  
18  
19 69. Russell-Jones D, Vaag A, Schmitz O, et al. Liraglutide vs insulin glargine and placebo in  
20 combination with metformin and sulfonylurea therapy in type 2 diabetes mellitus (LEAD-5  
21 met+SU): a randomised controlled trial. *Diabetologia* 2009;**52**:2046-55.  
22  
23  
24  
25 70. Russell-Jones D, Cuddihy RM, Hanefeld M, et al. Efficacy and safety of exenatide once weekly  
26 versus metformin, pioglitazone, and sitagliptin used as monotherapy in drug-naïve patients with  
27 type 2 diabetes (DURATION-4): a 26-week double-blind study. *Diabetes Care* 2012;**35**:252-8.  
28  
29  
30  
31  
32 71. Yang W, Chen L, Ji Q, et al. Liraglutide provides similar glycaemic control as glimepiride (both in  
33 combination with metformin) and reduces body weight and systolic blood pressure in Asian  
34 population with type 2 diabetes from China, South Korea and India: a 16-week, randomized,  
35 double-blind, active control trial. *Diabetes Obes Metab* 2011;**13**:81-8.  
36  
37  
38  
39  
40 72. Zinman B, Hoogerworf B J, Garcia SD, et al . The effect of adding exenatide to a thiazolidinedione  
41 in sub- optimally controlled type 2 diabetes. A randomized trial. *Ann Intern Med* 2007;**146**:477-  
42 485.  
43  
44  
45  
46  
47  
48 73. Zinman B, Gerich J, Buse J, et al. Efficacy and safety of the human glucagon-like peptide-1 analog  
49 liraglutide in combination with metformin and thiazolidinedione in patients with type 2 diabetes  
50 (LEAD-4 Met+TZD). *Diabetes Care* 2009;**32**:1224-30.  
51  
52  
53  
54  
55  
56  
57  
58  
59  
60

- 1  
2  
3 74. Gardiner SM, March JE, Kemp PA, Bennett T. Autonomic nervous system-dependent and –  
4  
5 independent cardiovascular effects of exendin-4 infusion in conscious rats. *Br J Pharmacol*  
6  
7 2008;**154**:60-71.  
8  
9  
10 75. Griffioen K J, Wan R, Okun E, et al. GLP-1 receptor stimulation depresses heart rate variability  
11  
12 and inhibits neurotransmission to cardiac vagal neurons. *Cardiovasc Res* 2010;**14**:1-7.  
13

#### 14 15 16 17 **FIGURE LEGENDS**

18  
19 Figure 1: PRISMA flow diagram  
20

21  
22 Figure 2: Effect of liraglutide on heart rate in patients with type 2 diabetes  
23

24  
25 Figure 3: Effect of exenatide on heart rate in patients with type 2 diabetes  
26

27  
28 Figure 4: GLP-1 agonists' effect on systolic blood pressure in patients with type 2 diabetes  
29

30  
31 Figure 5: GLP-1 agonists' effect on diastolic blood pressure in patients with type 2 diabetes  
32

33  
34 Figure 6: GLP-1 agonists' effects on body weight  
35  
36  
37  
38  
39  
40  
41  
42  
43  
44  
45  
46  
47  
48  
49  
50  
51  
52  
53  
54  
55  
56  
57  
58  
59  
60

**Table 1 Characteristics of included studies**

| Study                    | Comparisons                     | Duration (weeks) | Study population /ethnicity | Country        | Body weight groups included | Balanced Male/ Female? | Mean age | Standardised diet/ exercise | Background OAD |
|--------------------------|---------------------------------|------------------|-----------------------------|----------------|-----------------------------|------------------------|----------|-----------------------------|----------------|
| <b>Apovian, 2010</b>     | EX/PLAC                         | 24               | MR                          | US             | OW                          | >60% F                 | 54.8     | Y                           | MET and/or SU  |
| <b>Barnett, 2007</b>     | EX/IG                           | 16               | MR                          | Multi-national | N/OW/<br>OB                 | Y                      | 54.9     | N                           | MET or SU      |
| <b>Bergenstal , 2009</b> | EX/BIAsp                        | 24               | MR                          | US             | N/OW                        | Y                      | 52.6     | N                           | MET and SU     |
| <b>Bergenstal , 2010</b> | EX LAR vs PIO<br>EX LAR vs SITA | 26               | MR                          | Multi-national | N/OW/<br>OB                 | Y                      | 52.3     | N                           | MET            |
| <b>Buse, 2004</b>        | EX/PLAC                         | 30               | MR                          | US             | OW/OB                       | 60% M                  | 55.3     | N                           | SU             |
| <b>Buse, 2011</b>        | IG+EX/<br>IG+PLAC               | 30               | MR                          | Multi-national | N/OW/<br>OB                 | Y                      | 59.0     | N                           | MET or PIO     |

|                           |            |                    |        |                    |       |              |      |   |                                          |
|---------------------------|------------|--------------------|--------|--------------------|-------|--------------|------|---|------------------------------------------|
| <b>Davies,<br/>2009</b>   | EX/IG      | 26                 | MR     | GB                 | OW/OB | >60% M       | 56.5 | N | Two or three<br>OADS: MET,<br>SU, or TZD |
| <b>Defronzo,<br/>2005</b> | EX/PLAC    | 30                 | MR     | US                 | OW/OB | Y            | 53.0 | N | MET                                      |
| <b>Defronzo,<br/>2010</b> | EX vs ROSI | 20                 | MR     | US                 | OW/OB | Y            | 56.0 | N | MET                                      |
| <b>Derosa,<br/>2010</b>   | EX/GLIB    | 52                 | W      | IT                 | OW/OB | Y            | 56.5 | Y | MET                                      |
| <b>Derosa,<br/>2011</b>   | EX/GLIM    | 52                 | CAUC   | IT                 | OW/OB | Y            | 55.5 | Y | MET                                      |
| <b>Diamant,<br/>2010</b>  | EX LAR/IG  | 26                 | MR     | Multi-<br>national | OW/OB | Y            | 58.0 | N | MET                                      |
| <b>Gallwitz,<br/>2011</b> | EX/BIAsp   | 26                 | MR     | GER                | OW/OB | Not reported | 57.0 | N | MET                                      |
| <b>Gallwitz<br/>2012</b>  | EX/GLIM    | Up to 4.5<br>years | MR     | Multi-<br>national | OW/OB | Y            | 56.0 | N | MET                                      |
| <b>Gao,</b>               | EX/PLAC    | 12                 | C//K/T | Multi-<br>national | N/OW/ | Y            | 54.0 | N | MET and/or<br>SU                         |

|                       |               |    |    |                    |             |        |      |   |                                            |
|-----------------------|---------------|----|----|--------------------|-------------|--------|------|---|--------------------------------------------|
| 2009                  |               |    |    |                    | OB          |        |      |   |                                            |
| <b>Garber, 2009</b>   | LIR/GLIM      | 52 | MR | US/MEX             | N/OW/<br>OB | Y      | 53.0 | N | Nil - previous<br>OAD<br>withdrawn         |
| <b>Gill, 2010</b>     | EX/PLAC       | 12 | MR | CAN/NL             | OW/OB       | Y      | 55.6 | N | MET and/or<br>TZD                          |
| <b>Heine, 2005</b>    | EX/IG         | 26 | MR | Multi-<br>national | OW/OB       | Y      | 58.9 | N | MET and SU                                 |
| <b>Kadowaki, 2009</b> | EX/PLAC       | 12 | JP | JP                 | N/OW/<br>OB | >60% M | 60.3 | N | SU, with or<br>without either<br>BG or TZD |
| <b>Kendall, 2005</b>  | EX/PLAC       | 30 | MR | US                 | OW/OB       | Y      | 55.3 | Y | MET and SU                                 |
| <b>Kim, 2007</b>      | EX LAR/PLAC   | 15 | MR | US                 | OW/OB       | 60% M  | 53.7 | Y | MET                                        |
| <b>Liutkus, 2010</b>  | EX/PLAC       | 26 | MR | Multi-<br>national | OW/OB       | Y      | 54.7 | N | TZD with or<br>without MET                 |
| <b>Marre,</b>         | LIR/PLAC/ROSI | 26 | MR | Multi-             | N/OW/       | Y      | 56.0 | N | SU                                         |

|                            |                                         |    |       |                |         |   |      |   |            |
|----------------------------|-----------------------------------------|----|-------|----------------|---------|---|------|---|------------|
| 2009                       |                                         |    |       | national       | OB      |   |      |   |            |
| <b>Moretto, 2008</b>       | EX/PLAC                                 | 24 | MR    | Multi-national | OW/OB   | Y | 54.0 | Y | DRUG NAIVE |
| <b>Nauck, 2007</b>         | EX/PIA                                  | 52 | MR    | Multi-national | OW/OB   | Y | 58.5 | N | SU and MET |
| <b>Nauck, 2009</b>         | LIR/GLIM/PLAC                           | 26 | MR    | Multi-national | N/OW/OB | Y | 56.7 | N | MET        |
| <b>Pratley, 2010</b>       | LIR/SIT                                 | 26 | MR    | Multi-national | N-OW-OB | Y | 55.3 | N | MET        |
| <b>Russell-Jones, 2009</b> | LIR/IG/PLAC                             | 26 | MR    | Multi-national | N/OW/OB | Y | 57.5 | N | MET and SU |
| <b>Russell-Jones, 2012</b> | EX LAR/MET<br>EX LAR/PIO<br>EX LAR/SITA | 26 | MR    | Multi-national | N/OW/OB | Y | 54.0 | N | DRUG NAIVE |
| <b>Yang, 2011</b>          | LIR/GLIM                                | 16 | C/K/I | Multi-         | N/OW/   | Y | 53.3 | N | MET        |



|                         |          |    |    |                    |             |   |      |   |                            |
|-------------------------|----------|----|----|--------------------|-------------|---|------|---|----------------------------|
|                         |          |    |    | national           | OB          |   |      |   |                            |
| <b>Zinman,<br/>2007</b> | EX/PLAC  | 16 | MR | Multi-<br>national | OW/OB       | Y | 56.1 | N | TZD with or<br>without MET |
| <b>Zinman,<br/>2009</b> | LIR/PLAC | 26 | MR | US/CAN             | N/OW/<br>OB | Y | 55.0 | N | MET and<br>ROSI            |

EX, Exenatide; EX LAR, Exenatide long acting release; PLAC, placebo; IG, insulin glargine; BIAsp, biphasic insulin aspart; PIO, pioglitazone; SITA, sitagliptin;

ROSI, rosiglitazone; GLIB, glibenclamide; GLIM, glimepiride; LIR, liraglutide; MET, metformin, BG, Biguanide.

MR, Multi-racial; C, Chinese; K, Korean; I, Indian; T, Taiwanese; JP, Japanese; W, White; CAUC, Caucasian.

GB, Great Britain; US, United States; GER, Germany; CAN, Canada; JP, Japan; NL, Netherlands; MEX, Mexico; IT, Italy.

N, normal weight; OW, overweight; OB, obese.

1  
2  
3  
4  
5  
6  
7  
8  
9  
10  
11  
12  
13  
14  
15  
16  
17  
18  
19  
20  
21  
22  
23  
24  
25  
26  
27  
28  
29  
30  
31  
32  
33  
34  
35  
36  
37  
38  
39  
40  
41  
42  
43  
44  
45  
46  
47  
48  
49

**Table 2 Risk of bias across included studies**

Included studies were assessed using the Cochrane Risk of Bias Tool for factors which may cause bias in the trial outcomes and subsequent evaluation by meta-analysis: A) Randomisation, B) Allocation concealment, C) Blinding of participants/investigators/sponsors, D) Blinding outcome assessment, E) Incomplete outcome data, F) Selective outcome reporting, G) Other bias.

| No. | Study                         | A | B | C | D | E | F | G | Comments                                                                                     |
|-----|-------------------------------|---|---|---|---|---|---|---|----------------------------------------------------------------------------------------------|
| 1   | Apovian, 2010 <sup>□</sup>    | ■ | ■ | ■ | ■ | ■ | ■ | ■ | Greater than 20% attrition.                                                                  |
| 2   | Barnett, 2007* <sup>□</sup>   | ■ | ■ | ■ | ■ | ■ | ■ | ■ | Open label cross-over study.                                                                 |
| 3   | Bergenstal, 2009 <sup>□</sup> | ■ | ■ | ■ | ■ | ■ | ■ | ■ | Open label. Greater than 20% attrition and higher attrition in exenatide group.              |
| 4   | Bergenstal, 2010 <sup>□</sup> | ■ | ■ | ■ | ■ | ■ | ■ | ■ | Greater than 20% attrition. Outcome assessors unblinded after finalisation of analysis plan. |
| 5   | Buse, 2004                    | ■ | ■ | ■ | ■ | ■ | ■ | ■ | Greater than 20% attrition. Higher attrition in the placebo arm.                             |

|    |                                    |  |  |  |  |  |  |  |                                                                                |
|----|------------------------------------|--|--|--|--|--|--|--|--------------------------------------------------------------------------------|
| 6  | <b>Buse, 2011</b> <sup>□</sup>     |  |  |  |  |  |  |  | Groups not balanced for sex and concomitant medication.                        |
| 7  | <b>Davies, 2009</b>                |  |  |  |  |  |  |  | Open label.                                                                    |
| 8  | <b>Defronzo, 2005</b>              |  |  |  |  |  |  |  |                                                                                |
| 9  | <b>Defronzo, 2010</b> <sup>□</sup> |  |  |  |  |  |  |  | Open label. Greater than 20% attrition.                                        |
| 10 | <b>Derosa, 2010</b>                |  |  |  |  |  |  |  | Single blind.                                                                  |
| 11 | <b>Derosa, 2011</b> <sup>†</sup>   |  |  |  |  |  |  |  | Single blind.                                                                  |
| 12 | <b>Diamant, 2010</b> <sup>□</sup>  |  |  |  |  |  |  |  | Open label. Higher attrition in the exenatide arm.                             |
| 13 | <b>Gallwitz, 2011</b> <sup>*</sup> |  |  |  |  |  |  |  | Open label.                                                                    |
| 14 | <b>Gallwitz 2012</b> <sup>*</sup>  |  |  |  |  |  |  |  | Open label. Greater than 20% attrition. Higher attrition in the exenatide arm. |
| 15 | <b>Gao, 2009</b> <sup>□</sup>      |  |  |  |  |  |  |  |                                                                                |
| 16 | <b>Garber, 2009</b> <sup>□</sup>   |  |  |  |  |  |  |  | Greater than 20% attrition.                                                    |
| 17 | <b>Gill, 2010</b>                  |  |  |  |  |  |  |  |                                                                                |
| 18 | <b>Heine, 2005</b> <sup>*</sup>    |  |  |  |  |  |  |  | Open label. Higher attrition in the exenatide arm.                             |

1  
2  
3  
4  
5  
6  
7  
8  
9  
10  
11  
12  
13  
14  
15  
16  
17  
18  
19  
20  
21  
22  
23  
24  
25  
26  
27  
28  
29  
30  
31  
32  
33  
34  
35  
36  
37  
38  
39  
40  
41  
42  
43  
44  
45  
46  
47  
48  
49

1  
2  
3  
4  
5  
6  
7  
8  
9  
10  
11  
12  
13  
14  
15  
16  
17  
18  
19  
20  
21  
22  
23  
24  
25  
26  
27  
28  
29  
30  
31  
32  
33  
34  
35  
36  
37  
38  
39  
40  
41  
42  
43  
44  
45  
46  
47  
48  
49

|    |                                      |   |   |   |   |   |   |   |                                                                                                                                     |
|----|--------------------------------------|---|---|---|---|---|---|---|-------------------------------------------------------------------------------------------------------------------------------------|
| 19 | Kadowaki, <sup>‡</sup><br>2009       | █ | █ | █ | █ | █ | █ | █ |                                                                                                                                     |
| 20 | Kendall,<br>2005                     | █ | █ | █ | █ | █ | █ | █ |                                                                                                                                     |
| 21 | Kim, 2007                            | █ | █ | █ | █ | █ | █ | █ |                                                                                                                                     |
| 22 | Liutkus,<br>2010 <sup>‡</sup>        | █ | █ | █ | █ | █ | █ | █ |                                                                                                                                     |
| 23 | Marre,<br>2009                       | █ | █ | █ | █ | █ | █ | █ | Higher attrition in the placebo arm. Restriction of glimipiride and rosiglitazone in some countries precluded maximal dose regimes. |
| 24 | Moretto,<br>2008                     | █ | █ | █ | █ | █ | █ | █ | Diet and exercise regimes not standardised.                                                                                         |
| 25 | Nauck,<br>2007 <sup>□</sup>          | █ | █ | █ | █ | █ | █ | █ | Open label.                                                                                                                         |
| 26 | Nauck,<br>2009 <sup>□</sup>          | █ | █ | █ | █ | █ | █ | █ | Higher attrition in Liraglutide 1.8 mg and placebo arms.                                                                            |
| 27 | Pratley,<br>2010                     | █ | █ | █ | █ | █ | █ | █ | Open label, but statistician was masked to the allocation.                                                                          |
| 28 | Russell-Jones,<br>2009 <sup>*□</sup> | █ | █ | █ | █ | █ | █ | █ | Insulin glargine arm-open label.                                                                                                    |
| 29 | Russell-Jones<br>2012 <sup>□</sup>   | █ | █ | █ | █ | █ | █ | █ |                                                                                                                                     |

|    |              |   |   |   |   |   |   |   |                                                                  |
|----|--------------|---|---|---|---|---|---|---|------------------------------------------------------------------|
| 30 | Yang, 2011   | ■ | ■ | ■ | ■ | ■ | ■ | ■ | Higher attrition in the liraglutide groups.                      |
| 31 | Zinman, 2007 | ■ | ■ | ■ | ■ | ■ | ■ | ■ | Greater than 20% attrition. Higher attrition in exenatide group. |
| 32 | Zinman, 2009 | ■ | ■ | ■ | ■ | ■ | ■ | ■ | Greater than 20% attrition. Higher attrition in placebo group.   |

\* Open label; □ method of randomisation/allocation concealment consisted of a computer random-number generator and voice-response or telephone system; □ permuted block randomisation; ¥ randomised according to baseline biochemical values or background pharmacological agent; † randomised according to coded envelopes designed by a statistician ■ high risk; ■ low risk; ■ unclear risk.

1  
2  
3  
4  
5  
6  
7  
8  
9  
10  
11  
12  
13

# Effects of exenatide and liraglutide on heart rate, blood pressure and body weight: Systematic review and meta-analysis

14 Louise E. Robinson, MRes<sup>1</sup>

15 Tim A. Holt, PhD MRCP FRCGP<sup>1,2</sup>

16 Karen Rees, PhD<sup>1</sup>

17 Harpal S. Randeva, PhD FRCP<sup>1</sup>

18 Joseph P. O'Hare MD FRCP<sup>1</sup>

19  
20  
21  
22  
23  
24  
25  
26  
27  
28  
29  
30  
31  
32  
33  
34  
35  
36  
37  
38  
39  
40  
41  
42  
43  
44  
45  
46  
47

<sup>1</sup> Warwick Medical School, University of Warwick, Gibbet Hill Rd, Coventry CV4 7AL, UK

<sup>2</sup> Department of Primary Care Health Sciences, University of Oxford, Radcliffe Observatory Quarter Woodstock Road, Oxford, OX2 6GG, UK

## Corresponding author:

34 Dr Tim A. Holt  
35 NIHR Academic Clinical Lecturer  
36 Department of Primary Care Health Sciences  
37 University of Oxford  
38 Radcliffe Observatory Quarter  
39 Woodstock Road  
40 Oxford OX2 6GG  
41 United Kingdom  
42 Tel: 01865 289281  
43 Fax: 01865 289287  
44 Email: [tim.holt@phc.ox.ac.uk](mailto:tim.holt@phc.ox.ac.uk)

48  
49  
50  
51

**Key MeSH terms:** Diabetes Mellitus, Type 2; Glucagon-Like Peptide 1; Heart Rate; Blood Pressure; Body Weight.

52  
53  
54  
55  
56  
57  
58  
59  
60

**Word count:** 2381 words

**ABSTRACT**

**Objectives:** To synthesise current evidence for the effects of exenatide and liraglutide on heart rate, blood pressure, and body weight.

**Design:** Meta-analysis of available data from randomised controlled trials comparing GLP-1 analogues with placebo, active anti-diabetic drug therapy, or lifestyle intervention.

**Participants:** Patients with type 2 diabetes.

**Outcome measures:** Weighted mean differences between trial arms for changes in heart rate, blood pressure and body weight, after a minimum of 12 weeks follow up.

**Results:** 32 trials were included. ~~Liraglutide increased heart rate by 2.65 beats per minute (bpm) [95% confidence interval (CI), 1.78, 3.52] compared with placebo and by 1.61 bpm [1.10, 2.13] versus active control. Exenatide twice daily (BID) increased heart rate by 0.88 bpm [-0.47, 2.22] versus placebo but did not reach statistical significance, and by 1.36 [0.57, 2.14] versus active control. Exenatide long acting release (LAR) increased heart rate by 2.14 [1.11, 3.17] versus active control. Overall, GLP-1 agonists increased heart rate by 1.86 beats per minute (bpm) [95% confidence interval (CI) 0.85, 2.87] versus placebo and 1.90 bpm [1.30, 2.50] versus active control. This effect was more evident for liraglutide and exenatide long acting release (LAR) than for exenatide BID.~~

GLP-1 agonists decreased systolic blood pressure by -1.79mmHg [-2.94, -0.64] and -2.39mmHg [-3.35, -1.42] compared to placebo and active control respectively. Reduction in diastolic blood pressure failed to reach statistical significance (-0.54mmHg [-1.15, 0.07] vs placebo and -0.50mmHg [-1.24, 0.24] vs active control). Body weight decreased by -3.31kg [-4.05, -2.57] compared to active control but by only -1.22kg [-1.51, -0.93] compared to placebo.

**Conclusions:** GLP-1 analogues are associated with a small increase in heart rate, and modest reductions in body weight and blood pressure. Mechanisms underlying the rise in heart rate require further investigation.

**ARTICLE SUMMARY****Article focus**

- GLP-1 agonists are increasingly used in the management of type 2 diabetes, but their long term cardiovascular safety is not yet confirmed.
- These agents are known to reduce body weight and blood pressure, but are also associated with an elevation in heart rate that has not previously been quantified.

**Key messages**

- Our analysis confirms the weight and blood pressure reducing effects of liraglutide and exenatide, and reports a small rise in heart rate.
- The weight reducing effects are substantially greater when compared with active control treatments than placebo, as alternative treatment options may promote weight gain.
- Heart rate rises were more evident for liraglutide than exenatide, and for exenatide long acting release (LAR) than exenatide twice daily (BID).

**Strengths and limitations**

- We included unpublished data obtained from pharmaceutical companies, enabling the effects of GLP-1 agonists on heart rate to be quantified for the first time by meta-analysis.
- Our analysis is limited by significant heterogeneity between studies, and suggests the need for more detailed investigation using more accurate measurements of heart rate than those typically used in clinical practice.



## INTRODUCTION

In contrast to the weight increasing effects of several traditional anti-diabetic drug classes,[1] GLP-1 analogues have been shown to reduce both body weight and blood pressure.[2] The mechanisms producing weight loss have been extensively investigated, and involve improved satiety and reduced calorie ingestion both through effects on the central nervous system and through delayed gastric emptying.[3-6] Those leading to reduced blood pressure are less adequately understood, but this effect has been shown to occur as early as two weeks after commencing therapy, preceding significant weight loss, suggesting that a direct hypotensive effect is at least partly responsible.[7] Experimental studies of GLP-1 analogues have also reported direct effects on blood pressure, possibly via interaction with the autonomic nervous system.[8, 9]

Whilst a number of studies have reported heart rate increases, the associated mechanisms are unknown, and this effect is often dismissed as clinically unimportant. Given the safety implications attributed to raised heart rate in other contexts,[10-13] there is a surprising lack of concern over its possible implications in this setting. A recent review of liraglutide by Buse acknowledges the effect,[14] but a meta-analysis on safety of incretin based therapies published in 2010 did not mention heart rate,[15] nor does an overview of the LEAD trials of liraglutide by Blonde and Russell-Jones.[16] A large nationwide audit of exenatide designed by the Association of British Clinical Diabetologists (ABCD) did not include heart rate as an outcome, despite citing evidence for the effect in the main published report.[17] A subsequent (on-going) ABCD audit of liraglutide also aims to identify unknown safety issues but has similarly omitted heart rate from the protocol.[18]

GLP-1 analogues are an expanding drug class, with recent development of longer acting agents including the once weekly (LAR) form of exenatide, Bydureon. This drug has recently obtained approval from the National Institute for Health and Clinical Excellence for use in type 2 diabetes and its use is likely to increase.[19] A review of trial data from five long acting GLP-1 agonists (exenatide once weekly, taspeglutide, albiglutide, LY2189265 and CJC-1134-PC) concluded that they were more likely than shorter acting formulations to raise heart rate.[20] A more recently published study of the long acting GLP-1 agent PF-04603629 reported a substantial rise in heart rate (mean increase 23 bpm at 24 hours after injection of the higher dose studied), together with a rise in diastolic blood pressure.[21]

Whilst there is no evidence to date that these agents (short or long acting) increase cardiovascular event rates, safety data are limited by short follow up duration.[22] Longer term follow up is underway but will take a number of years to complete.

We aimed to identify and synthesise all available heart rate data from both published and unpublished sources, to quantify the effect of GLP-1 analogues on heart rate, as well as that on blood pressure and body weight.

## METHODS

### Literature searches

The following resources were systematically searched to identify completed, new or on-going controlled trials of liraglutide or exenatide: Clinical Trials Gov ([www.clinicaltrials.gov](http://www.clinicaltrials.gov)); Entertrials.co.uk; Clinicaltrialssearch.org; Centerwatch; Drugsontrial; WebMD; MEDLINE (from 1960); EMBASE (from 1960); Cochrane Library Central Register of Controlled Trials (CENTRAL). We used a search strategy to capture “exenatide”, “liraglutide” or “glucagon-like peptide-1” in any field, limited to “Randomised Controlled Trial,” “Clinical Trial,” or “Controlled Clinical Trial”. Conference proceedings (British Endocrinology Society, Diabetes UK, European Association for the Study of Diabetes) and websites (American Diabetes Association, Federal Drug Agency and European Medicines Agency) were examined, and the reference lists of trials, meta-analyses and reviews were searched for further studies. Novo Nordisk and Amylin Pharmaceuticals were contacted directly to request unpublished data. The review is up to date at July 2012.

### Inclusion and exclusion criteria

#### a) Participants

We only included trials involving participants with type 2 diabetes.

#### b) Study designs

We included all randomised trials with minimum follow up of 12 weeks. We excluded ‘open-label’ extension studies of phase 3 trials.

#### c) Interventions

Trials of liraglutide (1.2 or 1.8 mg daily), exenatide (5 or 10 µg BID), or exenatide LAR, either alone or in combination with an oral anti-diabetic drug (OAD) or insulin, were included. [These doses were chosen to coincide with those most commonly used in clinical practice.](#)

#### c) Comparison groups(s)

1  
2  
3 Comparators included placebo, OAD, lifestyle intervention, or insulin.  
4

5 d) Outcomes  
6

7 We included all studies reporting heart rate, blood pressure, or body weight outcomes.  
8  
9

10 **Data extraction**  
11

12 Retrieved studies were assessed for inclusion by two researchers independently using the above  
13 criteria and any discrepancies were resolved by consensus. Information on the participants,  
14 intervention, comparison group, outcomes and trial quality were extracted from included studies by  
15 two researchers independently. Where necessary, clarification of data was obtained by  
16 correspondence with trial co-ordinators.  
17  
18  
19

20 **Risk of Bias**  
21

22 We used the Cochrane tool to determine risk of selection bias (success of sequence generation and  
23 allocation concealment); performance bias (success of blinding to treatment received); detection  
24 bias (blinding of outcome assessment), attrition bias (incomplete outcome data and selective  
25 outcome reporting) and other biases.[23] Funnel plots were used to detect publication bias.  
26  
27  
28  
29

30 **Analysis**  
31

32 Means and standard deviations for baseline and outcome values for blood pressure, heart rate and  
33 body weight were extracted. Mean effect data from cross-over trials were extracted at the end of  
34 the initial phase. Where standard deviations for the outcome were not available they were imputed  
35 according to Cochrane Handbook for Systematic reviews version 5.[23] Standard deviations for  
36 changes from baseline were derived where necessary to account for correlation of baseline to follow  
37 up measurements within individuals, and where the correlation coefficient could not be calculated,  
38 methods were employed as recommended by Follman et al.[24] Study results were combined using  
39 RevMan version 5.2. Heterogeneity was estimated using the  $\chi^2$ - test and  $I^2$  statistic. Fixed and  
40 random effects weighted mean difference models using the Inverse Variance technique were used  
41 to compare outcomes between study drug and comparator with 95% confidence intervals (CI).  
42 Interaction effects were evaluated using pre-specified subgroup analyses (comparing various doses  
43 of study drug to active control or placebo) and type of GLP-1 agonist (liraglutide, exenatide BID and  
44 exenatide LAR preparations). Results are described using the random effects approach due to the  
45 heterogeneity of the included studies. Analyses were stratified by active control or placebo. We  
46 compared heterogeneity measures between these subgroups and according to GLP-1 agent. We also  
47 undertook sensitivity analyses to investigate the influence of trial designs on heterogeneity  
48  
49  
50  
51  
52  
53  
54  
55  
56  
57  
58  
59  
60

1  
2  
3 measures, including the background OAD treatment common to both arms. Funnel plots were  
4 assessed for asymmetry.  
5  
6  
7  
8

## 9 RESULTS

10  
11 Figure 1 describes the identification of included studies. A total of 521 articles were screened. Of  
12 these, 472 were excluded on the basis of the title or abstract being irrelevant to the aims of this  
13 review. Forty-nine studies were examined in full text. Out of these, 4 were excluded because the  
14 comparator was another form of GLP-1.[25-28] In 3 cases the doses were not as specified in our  
15 inclusion criteria,[29-31] and in a further 2 the study involved further analysis of data from trials that  
16 were already included.[32, 33] Finally, 8 were open label extension studies.[34-41] This left 32 trials  
17 included in our review (Figure 1 and Table 1).[42-73] Most studies did not report all of the outcomes  
18 of interest, or did not provide them as usable numerical data. Data were therefore obtained, where  
19 available directly from the pharmaceutical companies.  
20  
21  
22  
23  
24  
25

### 26 Methodological quality and risk of bias

27  
28 Results of risk of bias assessment are given in Table 2. Explanation of sequence generation and  
29 allocation concealment was adequate for all trials. In nine trials at least one arm was open-label.  
30 Attrition was adequately described and was greater than 20% in nine studies. The proportion of the  
31 intention to treat (ITT) population completing the study varied with range 65.4-99.6% and median  
32 83.7%. None of the trials were terminated prematurely. Funnel plots were broadly symmetrical with  
33 no evidence of publication bias.  
34  
35  
36  
37  
38  
39

### 40 Heterogeneity

41  
42 The trials varied in terms of duration of follow up, location, type of active comparator drug, and  
43 background therapy. One study was a cross-over trial[43] and one was of prolonged follow up.[55]  
44 The mean age of participants ranged from 52.3 to 60.3 years. For ~~all~~ most outcomes, we found  
45 significant heterogeneity (Figures 2 to 6). We therefore chose to report results using the random  
46 effects approach, although the differences between random effects and fixed effect results were  
47 very small. Heterogeneity varied significantly between comparisons. For the effect of Liraglutide on  
48 heart rate compared with placebo the I<sup>2</sup> value was 55%. However this value reduced to 0% when the  
49 data from a single trial (LEAD-1) was withheld.  
50  
51  
52  
53  
54  
55

### 56 Heart rate

1  
2  
3 A total of 22 studies provided heart rate data. ~~A summary from the Lead 1-5 trials of liraglutide[57,~~  
4 ~~64, 67, 69, 73] was obtained from Novo Nordisk and is given in Figure 2. Pooled results show a~~  
5 ~~significant increase in heart rate, with weighted mean difference 2.65 bpm [1.78, 3.52] versus~~  
6 ~~placebo and 1.61 bpm [1.10, 2.13] versus active control. GLP-1 agonists overall produce a significant~~  
7 ~~increase in heart rate with weighted mean difference 1.86 beats per minute (bpm) [0.85, 2.87]~~  
8 ~~versus placebo and 1.90 bpm [1.30, 2.50] versus active control. Looking at specific agents, liraglutide~~  
9 ~~increases heart rate by 2.71 bpm [1.45, 3.97] versus placebo and 2.49 [1.77, 3.21] versus active~~  
10 ~~control. The LEAD 1-5 trial data~~Data from the LEAD trials of liraglutide[57, 64, 67, 69, 73] were  
11 initially provided grouped into quartiles of baseline heart rate and demonstrated significant variation  
12 in effect between these subgroups, with greatest increase seen in those with lowest baseline values.  
13 Exenatide BID increased heart rate by ~~1.36 bpm [0.57, 2.14]~~0.82 bpm [-0.15, 1.79] versus active  
14 control and by 0.88 bpm [-0.47, 2.22] versus placebo, which did not reach statistical significance  
15 (Figure 3). Exenatide LAR produced a more significant change (2.14 bpm [1.11, 3.17] versus active  
16 control) but the number of studies involving this formulation was small.

### 26 Blood pressure

27  
28 We included 31 trials measuring blood pressure changes (Figures 4 and 5). GLP-1 agonists reduced  
29 systolic blood pressure by -1.79mmHg [-2.94, -0.64] compared to placebo and by -2.39 [-3.35, -1.42]  
30 compared to active control. Reductions in diastolic blood pressure failed to reach statistical  
31 significance, and were -0.54mmHg [-1.15, 0.07] compared to placebo and -0.50mmHg [-1.24, 0.24]  
32 compared to active control.

### 37 Body weight

38  
39 Twenty-one trials measuring changes in weight were included (Figure 6). We confirm a small but  
40 highly significant reduction in body weight as a result of GLP-1 therapy. Weight changed by -3.31kg [-  
41 4.05, -2.57] compared to active control but by only -1.22kg [-1.51, -0.93] compared to placebo.

### 46 DISCUSSION

47  
48 We have confirmed and quantified the effects of liraglutide and exenatide on heart rate, blood  
49 pressure and body weight. Our analysis benefited from the inclusion of unpublished data supplied by  
50 Novo Nordisk and Amylin Pharmaceuticals, as these were often missing from published trial reports.  
51 It was limited by the significant heterogeneity of effect size measurements between individual  
52 studies. We examined pre-specified subgroups according to GLP-1 agent and type of comparator  
53 (placebo or active control). Active control treatments varied between trials and included different  
54 classes of OAD and insulins, which may explain some of the variation in measured effect. Other  
55  
56  
57  
58  
59  
60

potential sources of heterogeneity include the characteristics of background OAD treatments common to both arms as these treatments differed between trials. For the heart rate effect of liraglutide versus placebo the heterogeneity was largely attributable to a single trial (LEAD-1), but the cause of the higher heart rate effect in this trial is unclear.

The weight reducing effects of these agents are a welcome contrast to the weight promoting effects of other treatment options, including sulphonylureas, thiazolidinediones, and insulin. We have derived a similar effect size to a previously reported value for weight loss,[2] although our study has distinguished between placebo and active comparators, in which effects sizes differ substantially. Together with the reduction in blood pressure, this may improve longer term cardiovascular risk. However, the small rise in heart rate is a reason for caution, as it might potentially be associated with adverse outcomes. This rise was more evident for liraglutide than exenatide BID, but exenatide LAR may produce a greater response than the BID formulation. The clinical significance of this heart rate rise is still unknown from the perspective of cardiovascular risk.

For most GLP-1 trials, heart rate is a secondary outcome measured as part of safety assessment, and is reported inconsistently. In clinic it is often measured using a very short sampling interval (perhaps one minute of data). One study was designed specifically to examine the effects of exenatide BID on change in heart rate as the primary outcome using 24 hour ambulatory monitoring.[58] The mean change from baseline at 12 weeks was 2.1 bpm for exenatide BID and -0.7 bpm for placebo. The sample size (54 randomised participants) in this pilot study was relatively small and the difference was not significant ( $p=0.16$ ), but is similar to the values we have obtained generally for GLP-1 agonists in our meta-analysis. Measurement of heart rate using this 24-hour technique (compared with a traditional heart rate measurement in clinic) substantially improves the accuracy of measurement as heart rate is very variable within the individual. This technique could be used as a basis for a larger study powered to detect such a difference and to investigate the influence of alternative background medications. This would enable investigation of pre-specified subgroups, including those with low baseline heart rate, who appeared in the LEAD studies of liraglutide to experience a more substantial change of 4.8 bpm versus placebo.

This review highlights the need to improve our understanding of the physiological mechanisms through which GLP-1 agonists act, whilst the results of longer term safety studies are awaited. Both autonomic nervous system-dependent and -independent effects have been suggested in animal studies as a basis for the rise in heart rate.[74, 75] The heart rate response in the presence or absence of autonomic neuropathy in human patients might therefore justify further study. There is

1  
2  
3 also a clear need to improve the comprehensive reporting of all outcome data measured during  
4 clinical trials of anti-diabetic agents, particularly those relevant to cardiovascular risk.  
5  
6  
7

#### 8 9 **ACKNOWLEDGEMENTS**

10  
11 We would like to thank Amylin Pharmaceuticals and Novo Nordisk for providing us with unpublished  
12 data for this meta-analysis.  
13  
14

#### 15 16 **CONTRIBUTORSHIP STATEMENT**

17  
18 LR, PO'H and HR were involved in the design and conception of the study. LR and TH conducted the  
19 bibliographic searches, identified the included papers, and extracted the data independently. KR  
20 advised on methodological issues. All authors were involved in drafting the manuscript.  
21  
22

#### 23 24 **ETHICAL APPROVAL**

25  
26 None required.  
27  
28

#### 29 30 **FUNDING STATEMENT**

31  
32 This research received no specific grant from any funding agency in the public, commercial or not-  
33 for-profit sectors.  
34  
35

#### 36 37 **COMPETING INTERESTS**

38  
39 LR, TH and KR have no interests to declare. PO'H and HR have received research funding (paid to  
40 Warwick Medical School) from Novo Nordisk, and payments for speaking from Novo Nordisk.  
41

#### 42 43 **DATA SHARING**

44  
45 All data used in this study are freely available by request to the corresponding author Dr Tim A. Holt.  
46

#### 47 48 **REFERENCES**

- 49  
50 1. Nathan DM, Buse JB, Davidson MB, et al. Medical management of hyperglycemia in type 2  
51 diabetes: A consensus algorithm for the initiation and adjustment of therapy. Diabetes Care  
52 2009;**32**:193–203.  
53  
54  
55  
56  
57  
58  
59  
60

- 1  
2  
3 2. Vilsboll T, Christensen M, Junker AE, et al. Effects of glucagon-like peptide receptor agonists on  
4 weight loss: systematic review and meta-analyses of randomized controlled trials. *BMJ*  
5 2012;**344**:1-11.  
6  
7
- 8  
9 3. Flint A, Raben A, Astrup A, Holst JJ. Glucagon-like peptide 1 promotes satiety and suppresses  
10 energy intake in humans. *J Clin Invest* 1998;**101**:515–520.  
11
- 12 4. MacDonald PE, El-kholy W, Riedel MJ, et al. The multiple actions of GLP-1 on the process of  
13 glucose-stimulated insulin secretion. *Diabetes* 2002;**51**(Suppl. 3):S434–S442.  
14  
15
- 16 5. Willms B, Werner J, Holst JJ, et al. Gastric emptying, glucose responses, and insulin secretion  
17 after a liquid test meal: effects of exogenous glucagon-like peptide-1 (GLP-1)-(7-36) amide in  
18 type 2 (noninsulin-dependent) diabetic patients. *J Clin Endocrinol Metab* 1996;**81**:327-332.  
19  
20
- 21 6. Meier JJ, Nauck MA. Glucagon-like peptide 1(GLP-1) in biology and pathology. *Diabetes Metab*  
22 *Res Rev* 2005;**21**:91–117.  
23  
24
- 25 7. Varanasi A, Chaudhuri A, Dhindsa S, et al. Durability of effects of exenatide on glycaemic  
26 control, body weight, systolic blood pressure, C-reactive protein and triglyceride concentrations.  
27 *Endocrin Prac* 2011;**17**:192-200.  
28  
29
- 30 8. Bojanowska E, Stempniak B. Effects of glucagon-like peptide-1 (7-36) amide on  
31 neurohypophysial hormone secretion induced by acute hyperosmotic challenge. *Neuropeptides*  
32 2003;**37**:45-50.  
33  
34
- 35 9. Bharucha AE, Charkoudian N, Andrews CN, et al. Effects of glucagon-like peptide-1, yohimbine,  
36 and nitregeric modulation on sympathetic and parasympathetic activity in humans. *Am J Physiol*  
37 *Regul Integr Comp Physiol* 2008;**295**:R874–R880.  
38  
39
- 40 10. Levine HJ . Rest heart rate and life expectancy. *J Am Coll Cardiol* 1997;**30**:1104-6.  
41  
42
- 43 11. Aronow WS, Ahn C, Mercado AD, et al. Association of average heart rate on 24-hour  
44 ambulatory electrocardiograms with incidence of new coronary events at 48-month follow-up in  
45 1311 patients (mean age 81 years) with heart disease and sinus rhythm. *Am J Cardiol* 1996;**78**:  
46 1175–6.  
47  
48  
49  
50  
51  
52  
53  
54  
55  
56  
57  
58  
59  
60



12. Hozawa A, Ohkubo T, Kikuya M, et al. Prognostic value of home heart rate for cardiovascular mortality in the general population: the Ohasama study. *Am J Hypertens* 2004;**17**:1005–10.
13. Anselmino M, Öhrvik J, Rydén L. Resting heart rate in patients with stable coronary artery disease and diabetes: a report from the euro heart survey on diabetes and the heart. *Eur Heart J* 2010;**31**:3040-5.
14. Bode B. An overview of the pharmacokinetics, efficacy and safety of liraglutide. *Diab Res Clin Pract* 2012;**97**:27-42.
15. Fakhoury WKH, Lereun C, Wright D. A meta-analysis of placebo-controlled clinical trials assessing the efficacy and safety of incretin- based medications in patients with type 2 diabetes. *Pharmacol* 2010;**86**:44-57.
16. Blonde L, Russell-Jones D. The safety and efficacy of liraglutide with or without oral antidiabetic drug therapy in type 2 diabetes: an overview of the LEAD 1-5 studies. *Diabetes Obes Metab* 2009;**11**(Suppl 3):26-34.
17. Ryder REJ, Thong KY, Cull ML, et al, on behalf of the ABCD nationwide exenatide audit contributors. The Association of British Clinical Diabetologists (ABCD) nationwide exenatide audit. *Practical Diabetes Int* 2010;**27**:352–357.
18. [http://www.diabetologists-abcd.org.uk/Objectives\\_Liraglutide\\_Audit.htm](http://www.diabetologists-abcd.org.uk/Objectives_Liraglutide_Audit.htm) (accessed 18<sup>th</sup> April 2012)
19. National Institute for Health and Clinical Excellence. Technology Appraisal TA248. Exenatide prolonged-release suspension for injection in combination with oral antidiabetic therapy for the treatment of type 2 diabetes. London, NICE, 2012.
20. Madsbad S, Kielgast U, Asmar M, et al. An overview of once-weekly glucagon-like peptide-1 receptor agonists - available efficacy and safety data and perspectives for the future. *Diabetes, Obesity and Metabolism* 2011;**13**:394-407.

- 1  
2  
3 21. Gustavson SM, Chen D, Somayaji V, et al. Effects of a long-acting GLP-1 mimetic (PF-04603629)  
4 on pulse rate and diastolic blood pressure in patients with type 2 diabetes mellitus. *Diabetes,*  
5  
6 *Obesity and Metabolism* 2011;**13**:1056–58.
- 7  
8  
9 22. Ratner R, Han J, Nicewarner D, Yushmanova I, et al. Cardiovascular safety of exenatide BID: an  
10 integrated analysis from controlled clinical trials in participants with type 2 diabetes. *Cardiovasc*  
11  
12 *Diabetol* 2011;**10**:22-32.
- 13  
14 23. Higgins JPT, Green S (editors). *Cochrane Handbook for Systematic Reviews of Interventions*  
15  
16 Version 5.1.0 [updated March 2011]. The Cochrane Collaboration, 2011. Available from  
17  
18 [www.cochrane-handbook.org](http://www.cochrane-handbook.org).
- 19  
20  
21 24. Follman D, Elliott P, Suh I, et al. Variance imputation for overviews of clinical trials with  
22 continuous response. *J Clin Epidemiol* 1992;**45**:769-73.
- 23  
24  
25 25. Blevins T, Pullman J, Malloy J, et al. DURATION 5: Exenatide once weekly resulted in greater  
26 improvements in glycemic control compared with exenatide twice daily in patients with type 2  
27  
28 diabetes. *J Clin Endocrinol Metab* 2011;**96**:1301-10.
- 29  
30  
31 26. Buse JB, Rosenstock J, Sesti G, et al. Liraglutide once a day versus exenatide twice a day for type  
32  
33  
34 2 diabetes: a 26- week randomised, parallel-group, multinational, open label trial (LEAD-6).  
35  
36 *Lancet* 2009;**374**:39-47.
- 37  
38  
39 27. Buse JB, Drucker DJ, Taylor KL, et al. DURATION-1: exenatide once weekly produces sustained  
40 glycemic control and weight loss over 52 weeks. *Diabetes Care* 2010;**33**:1255–1261.
- 41  
42  
43 28. Drucker D, Buse JB, Taylor K, et al. Exenatide once- weekly versus twice daily for the treatment  
44 of type 2 diabetes: a randomized open- label, non- inferiority study. *Lancet* 2008;**372**:1240-50.
- 45  
46  
47 29. Bunck MC, Diamant M, Corner A, et al. One-year treatment with exenatide improves beta-cell  
48 function, compared with insulin glargine, in metformin-treated type 2 diabetic patients: a  
49  
50 randomized, controlled trial. *Diabetes Care* 2009;**32**:762-768.
- 51  
52  
53  
54  
55  
56  
57  
58  
59  
60

- 1  
2  
3 30. Feinglos MN, Saad MF, Pi-Sunyer FX, An B, Santiago O. Effects of liraglutide (NN2211), a long-  
4 acting GLP-1 analogue, on glycaemic control and bodyweight in subjects with Type 2 diabetes.  
5 Diabet Med 2005;**22**:1016-1023.  
6  
7  
8  
9  
10 31. Vilsboll T, Zdravkovic M, Le-Thi T, et al. Liraglutide, a long-acting human glucagon-like peptide-1  
11 analog, given as monotherapy significantly improves glycemic control and lowers body weight  
12 without risk of hypoglycemia in patients with type 2 diabetes. Diabetes Care 2007;**30**:1608-10.  
13  
14  
15 32. Bode BW, Testa MA, Magwire M, et al. Patient-reported outcomes following treatment with the  
16 human GLP-1 analogue liraglutide or glimepiride in monotherapy: results from a randomized  
17 controlled trial in patients with type 2 diabetes. Diabetes, Obesity and Metabolism 2010;**12**:604–  
18 12.  
19  
20  
21  
22  
23  
24 33. Davies M, Pratley R, Hammer M, et al. Liraglutide improves treatment satisfaction in people with  
25 Type 2 diabetes compared with sitagliptin, each as an add on to metformin. Diabet Med  
26 2011;**28**:333–337.  
27  
28  
29  
30  
31 34. Bunck MC, Cornér A, Eliasson B, et al. One year treatment with exenatide vs. insulin glargine:  
32 effects on post-prandial glycemia, lipid profiles and oxidative stress. Atherosclerosis 2010;**212**:  
33 223-9.  
34  
35  
36  
37 35. Bunck MC, Cornér A, Eliasson B, et al. Effects of exenatide on measures of beta-cell function  
38 after 3 years in metformin-treated patients with type 2 diabetes. Diabetes Care 2011;**34**:2041-7.  
39  
40  
41 36. Buse JB, Klonoff DC, Nielsen LL, et al. Metabolic effects of two years of exenatide treatment on  
42 diabetes, obesity, and hepatic biomarkers in patients with type 2 diabetes: an interim analysis of  
43 data from the open-label, uncontrolled extension of three double-blind, placebo-controlled  
44 trials. Clin Ther 2007;**29**:139-153.  
45  
46  
47  
48  
49  
50 37. Klonoff DC, Buse JB, Nielsen LL, et al. Exenatide effects on diabetes, obesity, cardiovascular risk  
51 factors and hepatic biomarkers in patients with type 2 diabetes treated for at least 3 years. Curr  
52 Med Res Opin 2008;**24**:275-86.  
53  
54  
55  
56  
57  
58  
59  
60

- 1  
2  
3 38. Pratley R, Nauck M, Bailey T, et al. One year of liraglutide treatment offers sustained and more  
4 effective glycaemic control and weight reduction compared with sitagliptin, both in combination  
5 with metformin, in patients with type 2 diabetes: a randomised, parallel-group, open-label trial.  
6  
7 Int J Clin Pract 2011;**65**:397-407.  
8  
9  
10  
11 39. Ratner RE, Maggs D, Nielsen LL. et al. Long term effects of exenatide therapy over 82 weeks on  
12 glycemic control and weight in overweight metformin treated patients with type 2 diabetes  
13 mellitus. Diab Obes Metab 2006;**8**:419-28.  
14  
15  
16  
17 40. Riddle MC, Henry RR, Poon TH, et al. Exenatide elicits sustained glycaemic control and  
18 progressive reduction of body weight in patients with type 2 diabetes inadequately controlled by  
19 sulphonylureas with or without metformin. Diabetes Metab Res Rev 2006;**22**:483-91.  
20  
21  
22  
23 41. Wysham C, Bergenstal R, Malloy J, et al. DURATION-2: efficacy and safety of switching from  
24 maximum daily sitagliptin or pioglitazone to once-weekly exenatide. Diabet Med 2011;**28**:705-  
25 14.  
26  
27  
28  
29  
30 42. Apovian CM, Bergenstal RM, Cuddihy RM, et al. Effects of exenatide combined with lifestyle  
31 modification in patients with type 2 diabetes. Am J Med 2010;**123**:468-77.  
32  
33  
34  
35 43. Barnett AH, Burger J, Johns D, et al Tolerability and efficacy of exenatide and titrated insulin  
36 glargine in adult patients with type 2 diabetes previously uncontrolled with metformin or a  
37 sulphonylurea: a multinational, randomised, open label two period crossover non-inferiority  
38 trial. Clinical Therapeutics 2007;**29**:2333-48.  
39  
40  
41  
42  
43 44. Bergenstal R, Lewin A, Bailey T, et al. Efficacy and safety of biphasic insulin aspart 70/30 versus  
44 exenatide in subjects with type 2 diabetes failing to achieve glycemic control with metformin  
45 and a sulphonylurea. Curr Med Res Opin 2009;**25**:65-75.  
46  
47  
48  
49  
50 45. Bergenstal RM, Wysham C, MacConell L, et al. Efficacy and safety of exenatide once weekly  
51 versus sitagliptin or pioglitazone as an adjunct to metformin for treatment of type 2 diabetes  
52 (DURATION-2): a randomised trial. Lancet 2010;**376**:431-9.  
53  
54  
55  
56  
57  
58  
59  
60

- 1  
2  
3 46. Buse JB, Henry RR, Han J, et al. Effects of exenatide (Exendin-4) on glycaemic control over 30  
4 weeks in patients with type 2 diabetes treated with metformin and a sulphonylurea. *Diabetes*  
5 *Care* 2004;**27**:2628-35.  
6  
7  
8  
9  
10 47. Buse JB, Bergenstal RM, Glass LC, et al. Use of twice daily exenatide in basal insulin-treated  
11 patients with type 2 diabetes. A randomized controlled trial. *Ann Int Med* 2011;**154**:103-112.  
12  
13 48. Davies MJ, Donnelly R, Barnett AH, et al. Exenatide compared with long-acting insulin to achieve  
14 glycaemic control with minimal weight gain in patients with type 2 diabetes: results of helping  
15 evaluate exenatide in patients with diabetes compared with long-acting insulin (HEELA) study.  
16 *Diabetes Obes Metab* 2009;**11**:1153-64.  
17  
18  
19  
20 49. DeFronzo RA, Ratner RE, Han J, et al. Effects of exenatide (exendin-4) on glycemic control and  
21 weight over 30 weeks in metformin-treated patients with type 2 diabetes. *Diabetes Care*  
22 2005;**28**:1092-1100.  
23  
24  
25  
26  
27  
28 50. Defronzo RA, Triplitt C, Qu Y, et al. Effects of exenatide plus rosiglitazone on beta-cell function  
29 and insulin sensitivity in subjects with type 2 diabetes on metformin. *Diabetes Care* 2010;**33**:951-  
30 7.  
31  
32  
33  
34  
35 51. Derosa G, Maffioli P, Salvadeo SA, et al. Exenatide vs. glibenclamide in patients with diabetes.  
36 *Diabetes Technol Therap* 2010;**12**:233-40.  
37  
38  
39 52. Derosa G, Putignano P, Bossi AC, et al. Exenatide or glimepiride added to metformin on  
40 metabolic control and on insulin resistance in type 2 diabetic patients. *Eur J Pharmacol*  
41 2011;**666**:251-6.  
42  
43  
44  
45 53. Diamant M, Gaal L, Stranks S, et al. Once weekly exenatide compared with insulin glargine  
46 titrated to target in patients with Type 2 Diabetes (DURATION 3): An open-label randomised  
47 trial. *Lancet* 2010;**375**:2234-43.  
48  
49  
50  
51  
52 54. Gallwitz B, Bohmer M, Segiet T, et al. Exenatide twice daily versus premixed insulin aspart 70/30  
53 in metformin-treated patients with type 2 diabetes: a randomized 26-week study on glycaemic  
54 control and hypoglycaemia. *Diabetes Care* 2011;**34**:604-6.  
55  
56  
57  
58  
59  
60

- 1  
2  
3 55. Gallwitz B, Guzman J, Dotta F, et al. Exenatide twice daily versus glimepiride for prevention of  
4 glycaemic deterioration in patients with type 2 diabetes with metformin failure (EUREXA): an  
5 open-label, randomised controlled trial. *Lancet* 2012;**379**:2270-8.  
6  
7  
8  
9  
10 56. Gao Y, Yoon KH, Chuang L-M, et al. Efficacy and safety of exenatide in patients of Asian descent  
11 with type 2 diabetes inadequately controlled with metformin or metformin and a sulphonylurea.  
12 *Diabetes Res Clin Pract* 2009;**83**:69-76.  
13  
14  
15  
16 57. Garber A, Henry R, Ratner R, et al for the LEAD-3 (Mono) Study Group. Liraglutide versus  
17 glimepiride monotherapy for type 2 diabetes (LEAD-3 Mono): a randomised, 52-week, phase III,  
18 double-blind, parallel-treatment trial. *Lancet* 2009;**373**:473-81.  
19  
20  
21  
22 58. Gill A, Hoogwerf BJ, Burger J, et al. Effect of exenatide on heart rate and blood pressure in  
23 subjects with type 2 diabetes mellitus: a double blind, placebo controlled, randomized pilot  
24 study. *Cardiovasc Diabetol* 2010;**9**:6.  
25  
26  
27  
28  
29 59. Heine RJ, Van Gaal LF, Johns D, et al. GWAA Study Group. Exenatide vs insulin glargine in  
30 patients with suboptimally controlled type 2 diabetes: a randomised trial. *Ann Intern Med*  
31 2005;**143**:559-69.  
32  
33  
34  
35 60. Kadowaki T, Namba M, Yamamura A, et al. Exenatide exhibits dose-dependent effects on  
36 glycemic control over 12 weeks in Japanese patients with suboptimally controlled type 2  
37 diabetes. *Endocr J* 2009;**56**:415-24.  
38  
39  
40  
41 61. Kendall DM, Riddle MC, Rosenstock J, et al. Effects of exenatide (Exendin-4) on glycaemic control  
42 over 30 weeks in patients with type 2 diabetes treated with metformin and a sulphonylurea.  
43 *Diabetes Care* 2005;**28**:1083-91.  
44  
45  
46  
47  
48 62. Kim D, MacConell L, Zhuang D, et al. Effects of once-weekly dosing of a long-acting release  
49 formulation of exenatide on glucose control and body weight in subjects with type 2 diabetes.  
50 *Diabetes Care* 2007;**30**:1487-93.  
51  
52  
53  
54  
55  
56  
57  
58  
59  
60

- 1  
2  
3 63. Liutkus J, Guzman JR, Norwood P, et al. A placebo- controlled trial of exenatide twice-daily added  
4  
5 to thiazolidinediones alone or in combination with metformin. *Diabetes Obes Metab*  
6  
7 2010;**12**:1058-65.  
8
- 9 64. Marre M, Shaw J, Brandle M, et al. Liraglutide once-daily human GLP-1 analogue, added to a  
10  
11 sulphonylurea over 26 weeks produces greater improvements in glycaemic and weight control  
12  
13 compared with adding rosiglitazone or placebo in subjects with type 2 diabetes (Lead 1-SU).  
14  
15 *Diabet Med* 2009;**26**:268-78.  
16
- 17 65. Moretto TJ, Milton DR, Ridge TD. et al. Efficacy and tolerability of exenatide monotherapy over  
18  
19 24 weeks in antidiabetic drug-naive patients with type 2 diabetes: A randomized, double blind,  
20  
21 placebo-controlled parallel-group study. *Clinical Therapeutics* 2008;**30**:1448-60.  
22  
23
- 24 66. Nauck M A, Duran S, Kim D, et al. A comparison of twice-daily exenatide and biphasic insulin  
25  
26 aspart in patients with type 2 diabetes who were suboptimally controlled with sulfonylurea and  
27  
28 metformin: a non-inferiority study. *Diabetologia* 2007;**50**:259-267.  
29
- 30 67. Nauck M, Frid A, Hermansen K, et al. Efficacy and safety comparison of liraglutide, glimepiride  
31  
32 and placebo, all in combination with metformin in type 2 diabetes. *Diabetes Care* 2009;**32**:84-90.  
33  
34
- 35 68. Pratley R E, Nauck M, Bailey T, et al. Liraglutide vs sitagliptin for patients with type 2 diabetes  
36  
37 who did not have adequate glycemic control with metformin: a 26 week, randomised, parallel  
38  
39 group, open- label trial. *Lancet* 2010;**375**:1447-56.  
40  
41
- 42 69. Russell-Jones D, Vaag A, Schmitz O, et al. Liraglutide vs insulin glargine and placebo in  
43  
44 combination with metformin and sulfonylurea therapy in type 2 diabetes mellitus (LEAD-5  
45  
46 met+SU): a randomised controlled trial. *Diabetologia* 2009;**52**:2046-55.  
47
- 48 70. Russell-Jones D, Cuddihy RM, Hanefeld M, et al. Efficacy and safety of exenatide once weekly  
49  
50 versus metformin, pioglitazone, and sitagliptin used as monotherapy in drug-naïve patients with  
51  
52 type 2 diabetes (DURATION-4): a 26-week double-blind study. *Diabetes Care* 2012;**35**:252-8.  
53  
54
- 55 71. Yang W, Chen L, Ji Q, et al. Liraglutide provides similar glycaemic control as glimepiride (both in  
56  
57 combination with metformin) and reduces body weight and systolic blood pressure in Asian  
58  
59  
60

1  
2  
3 population with type 2 diabetes from China, South Korea and India: a 16-week, randomized,  
4 double-blind, active control trial. *Diabetes Obes Metab* 2011;**13**:81-8.  
5  
6

7 72. Zinman B, Hoogerworf B J, Garcia SD, et al . The effect of adding exenatide to a thiazolidinedione  
8 in sub- optimally controlled type 2 diabetes. A randomized trial. *Ann Intern Med* 2007;**146**:477-  
9 485.  
10  
11

12  
13 73. Zinman B, Gerich J, Buse J, et al. Efficacy and safety of the human glucagon-like peptide-1 analog  
14 liraglutide in combination with metformin and thiazolidinedione in patients with type 2 diabetes  
15 (LEAD-4 Met+TZD). *Diabetes Care* 2009;**32**:1224-30.  
16  
17

18 74. Gardiner SM, March JE, Kemp PA, Bennett T. Autonomic nervous system-dependent and –  
19 independent cardiovascular effects of exendin-4 infusion in conscious rats. *Br J Pharmacol*  
20 2008;**154**:60-71.  
21  
22

23 75. Griffioen K J, Wan R, Okun E, et al. GLP-1 receptor stimulation depresses heart rate variability  
24 and inhibits neurotransmission to cardiac vagal neurons. *Cardiovasc Res* 2010;**14**:1-7.  
25  
26  
27  
28  
29  
30  
31  
32  
33

#### 34 **FIGURE LEGENDS**

35  
36 Figure 1: PRISMA flow diagram  
37

38  
39 Figure 2: Effect of liraglutide on heart rate in patients with type 2 diabetes  
40

41  
42 Figure 3: Effect of exenatide on heart rate in patients with type 2 diabetes  
43

44  
45 Figure 4: GLP-1 agonists' effect on systolic blood pressure in patients with type 2 diabetes  
46

47  
48 Figure 5: GLP-1 agonists' effect on diastolic blood pressure in patients with type 2 diabetes  
49

50  
51 Figure 6: GLP-1 agonists' effects on body weight  
52  
53  
54  
55  
56  
57  
58  
59  
60



Table 1 Characteristics of included studies

| Study                    | Comparisons                     | Duration (weeks) | Study population /ethnicity | Country        | Body weight groups included | Balanced Male/ Female? | Mean age    | Standardised diet/ exercise | Background OAD |
|--------------------------|---------------------------------|------------------|-----------------------------|----------------|-----------------------------|------------------------|-------------|-----------------------------|----------------|
| <b>Apovian, 2010</b>     | EX/PLAC                         | 24               | MR                          | US             | OW                          | >60% F                 | <u>54.8</u> | Y                           | MET and/or SU  |
| <b>Barnett, 2007</b>     | EX/IG                           | 16               | MR                          | Multi-national | N/OW/<br>OB                 | Y                      | <u>54.9</u> | N                           | MET or SU      |
| <b>Bergenstal , 2009</b> | EX/BIAsp                        | 24               | MR                          | US             | N/OW                        | Y                      | <u>52.6</u> | N                           | MET and SU     |
| <b>Bergenstal , 2010</b> | EX LAR vs PIO<br>EX LAR vs SITA | 26               | MR                          | Multi-national | N/OW/<br>OB                 | Y                      | <u>52.3</u> | N                           | MET            |
| <b>Buse, 2004</b>        | EX/PLAC                         | 30               | MR                          | US             | OW/OB                       | 60% M                  | <u>55.3</u> | N                           | SU             |
| <b>Buse, 2011</b>        | IG+EX/<br>IG+PLAC               | 30               | MR                          | Multi-national | N/OW/<br>OB                 | Y                      | <u>59.0</u> | N                           | MET or PIO     |

1  
2  
3  
4  
5  
6  
7  
8  
9  
10  
11  
12  
13  
14  
15  
16  
17  
18  
19  
20  
21  
22  
23  
24  
25  
26  
27  
28  
29  
30  
31  
32  
33  
34  
35  
36  
37  
38  
39  
40  
41  
42  
43  
44  
45  
46  
47  
48  
49

|                       |            |                 |        |                |       |              |             |   |                                    |
|-----------------------|------------|-----------------|--------|----------------|-------|--------------|-------------|---|------------------------------------|
| <b>Davies, 2009</b>   | EX/IG      | 26              | MR     | GB             | OW/OB | >60% M       | <u>56.5</u> | N | Two or three OADS: MET, SU, or TZD |
| <b>Defronzo, 2005</b> | EX/PLAC    | 30              | MR     | US             | OW/OB | Y            | <u>53.0</u> | N | MET                                |
| <b>Defronzo, 2010</b> | EX vs ROSI | 20              | MR     | US             | OW/OB | Y            | <u>56.0</u> | N | MET                                |
| <b>Derosa, 2010</b>   | EX/GLIB    | 52              | W      | IT             | OW/OB | Y            | <u>56.5</u> | Y | MET                                |
| <b>Derosa, 2011</b>   | EX/GLIM    | 52              | CAUC   | IT             | OW/OB | Y            | <u>55.5</u> | Y | MET                                |
| <b>Diamant, 2010</b>  | EX LAR/IG  | 26              | MR     | Multi-national | OW/OB | Y            | <u>58.0</u> | N | MET                                |
| <b>Gallwitz, 2011</b> | EX/BIAsp   | 26              | MR     | GER            | OW/OB | Not reported | <u>57.0</u> | N | MET                                |
| <b>Gallwitz 2012</b>  | EX/GLIM    | Up to 4.5 years | MR     | Multi-national | OW/OB | Y            | <u>56.0</u> | N | MET                                |
| <b>Gao,</b>           | EX/PLAC    | 12              | C//K/T | Multi-national | N/OW/ | Y            | <u>54.0</u> | N | MET and/or SU                      |

|                       |                       |    |    |                    |             |        |             |   |                                            |
|-----------------------|-----------------------|----|----|--------------------|-------------|--------|-------------|---|--------------------------------------------|
| 2009                  |                       |    |    |                    | OB          |        |             |   |                                            |
| <b>Garber, 2009</b>   | LIR/GLIM              | 52 | MR | US/MEX             | N/OW/<br>OB | Y      | <u>53.0</u> | N | Nil - previous<br>OAD<br>withdrawn         |
| <b>Gill, 2010</b>     | EX/PLAC               | 12 | MR | CAN/NL             | OW/OB       | Y      | <u>55.6</u> | N | MET and/or<br>TZD                          |
| <b>Heine, 2005</b>    | EX/IG                 | 26 | MR | Multi-<br>national | OW/OB       | Y      | <u>58.9</u> | N | MET and SU                                 |
| <b>Kadowaki, 2009</b> | EX/PLAC               | 12 | JP | JP                 | N/OW/<br>OB | >60% M | <u>60.3</u> | N | SU, with or<br>without either<br>BG or TZD |
| <b>Kendall, 2005</b>  | EX/PLAC               | 30 | MR | US                 | OW/OB       | Y      | <u>55.3</u> | Y | MET and SU                                 |
| <b>Kim, 2007</b>      | EX LAR/PLAC           | 15 | MR | US                 | OW/OB       | 60% M  | <u>53.7</u> | Y | MET                                        |
| <b>Liutkus, 2010</b>  | EX/PLAC               | 26 | MR | Multi-<br>national | OW/OB       | Y      | <u>54.7</u> | N | TZD with or<br>without MET                 |
| <b>Marre,</b>         | LIR/PLAC/ <u>ROSI</u> | 26 | MR | Multi-             | N/OW/       | Y      | <u>56.0</u> | N | SU <del>with or</del>                      |

|                            |                                         |    |       |                    |             |   |             |   |              |
|----------------------------|-----------------------------------------|----|-------|--------------------|-------------|---|-------------|---|--------------|
| 2009                       |                                         |    |       | national           | OB          |   |             |   | without ROSI |
| Moretto,<br>2008           | EX/PLAC                                 | 24 | MR    | Multi-<br>national | OW/OB       | Y | <u>54.0</u> | Y | DRUG NAIVE   |
| Nauck,<br>2007             | EX/PIA                                  | 52 | MR    | Multi-<br>national | OW/OB       | Y | <u>58.5</u> | N | SU and MET   |
| Nauck,<br>2009             | LIR/GLIM/PLAC                           | 26 | MR    | Multi-<br>national | N/OW/<br>OB | Y | <u>56.7</u> | N | MET          |
| Pratley,<br>2010           | LIR/SIT                                 | 26 | MR    | Multi-<br>national | N- OW-OB    | Y | <u>55.3</u> | N | MET          |
| Russell-<br>Jones,<br>2009 | LIR/IG/PLAC                             | 26 | MR    | Multi-<br>national | N/OW/<br>OB | Y | <u>57.5</u> | N | MET and SU   |
| Russell-<br>Jones,<br>2012 | EX LAR/MET<br>EX LAR/PIO<br>EX LAR/SITA | 26 | MR    | Multi-<br>national | N/OW/<br>OB | Y | <u>54.0</u> | N | DRUG NAIVE   |
| Yang, 2011                 | LIR/GLIM                                | 16 | C/K/I | Multi-             | N/OW/       | Y | <u>53.3</u> | N | MET          |

|                     |          |    |    |                |         |   |             |   |                         |
|---------------------|----------|----|----|----------------|---------|---|-------------|---|-------------------------|
|                     |          |    |    | national       | OB      |   |             |   |                         |
| <b>Zinman, 2007</b> | EX/PLAC  | 16 | MR | Multi-national | OW/OB   | Y | <u>56.1</u> | N | TZD with or without MET |
| <b>Zinman, 2009</b> | LIR/PLAC | 26 | MR | US/CAN         | N/OW/OB | Y | <u>55.0</u> | N | MET and ROSI            |

EX, Exenatide; EX LAR, Exenatide long acting release; PLAC, placebo; IG, insulin glargine; BIAsp, biphasic insulin aspart; PIO, pioglitazone; SITA, sitagliptin;

ROSI, rosiglitazone; GLIB, glibenclamide; GLIM, glimepiride; LIR, liraglutide; MET, metformin, BG, Biguanide.

MR, Multi-racial; C, Chinese; K, Korean; I, Indian; T, Taiwanese; JP, Japanese; W, White; CAUC, Caucasian.

GB, Great Britain; US, United States; GER, Germany; CAN, Canada; JP, Japan; NL, Netherlands; MEX, Mexico; IT, Italy.

N, normal weight; OW, overweight; OB, obese.

1  
2  
3  
4  
5  
6  
7  
8  
9  
10  
11  
12  
13  
14  
15  
16  
17  
18  
19  
20  
21  
22  
23  
24  
25  
26  
27  
28  
29  
30  
31  
32  
33  
34  
35  
36  
37  
38  
39  
40  
41  
42  
43  
44  
45  
46  
47  
48  
49

**Table 2 Risk of bias across included studies**

Included studies were assessed using the Cochrane Risk of Bias Tool for factors which may cause bias in the trial outcomes and subsequent evaluation by meta-analysis: A) Randomisation, B) Allocation concealment, C) Blinding of participants/investigators/sponsors, D) Blinding outcome assessment, E) Incomplete outcome data, F) Selective outcome reporting, G) Other bias.

| No. | Study                          | A | B | C | D | E | F | G | Comments                                                                                     |
|-----|--------------------------------|---|---|---|---|---|---|---|----------------------------------------------------------------------------------------------|
| 1   | Apovian, 2010 <sup>□</sup>     | ■ | ■ | ■ | ■ | ■ | ■ | ■ | Greater than 20% attrition.                                                                  |
| 2   | Barnett, 2007* <sup>□</sup>    | ■ | ■ | ■ | ■ | ■ | ■ | ■ | Open label cross-over study.                                                                 |
| 3   | Bergenstal, 2009* <sup>□</sup> | ■ | ■ | ■ | ■ | ■ | ■ | ■ | Open label. Greater than 20% attrition and higher attrition in exenatide group.              |
| 4   | Bergenstal, 2010 <sup>□</sup>  | ■ | ■ | ■ | ■ | ■ | ■ | ■ | Greater than 20% attrition. Outcome assessors unblinded after finalisation of analysis plan. |
| 5   | Buse, 2004                     | ■ | ■ | ■ | ■ | ■ | ■ | ■ | Greater than 20% attrition. Higher attrition in the placebo arm.                             |

|    |                                    |  |  |  |  |  |  |  |                                                                                |
|----|------------------------------------|--|--|--|--|--|--|--|--------------------------------------------------------------------------------|
| 6  | <b>Buse, 2011</b> <sup>□</sup>     |  |  |  |  |  |  |  | Groups not balanced for sex and concomitant medication.                        |
| 7  | <b>Davies, 2009</b> <sup>*</sup>   |  |  |  |  |  |  |  | Open label.                                                                    |
| 8  | <b>Defronzo, 2005</b>              |  |  |  |  |  |  |  |                                                                                |
| 9  | <b>Defronzo, 2010</b> <sup>□</sup> |  |  |  |  |  |  |  | Open label. Greater than 20% attrition.                                        |
| 10 | <b>Derosa, 2010</b>                |  |  |  |  |  |  |  | Single blind.                                                                  |
| 11 | <b>Derosa, 2011</b> <sup>†</sup>   |  |  |  |  |  |  |  | Single blind.                                                                  |
| 12 | <b>Diamant, 2010</b> <sup>□</sup>  |  |  |  |  |  |  |  | Open label. Higher attrition in the exenatide arm.                             |
| 13 | <b>Gallwitz, 2011</b> <sup>*</sup> |  |  |  |  |  |  |  | Open label.                                                                    |
| 14 | <b>Gallwitz 2012</b> <sup>*</sup>  |  |  |  |  |  |  |  | Open label. Greater than 20% attrition. Higher attrition in the exenatide arm. |
| 15 | <b>Gao, 2009</b> <sup>□</sup>      |  |  |  |  |  |  |  |                                                                                |
| 16 | <b>Garber, 2009</b> <sup>□</sup>   |  |  |  |  |  |  |  | Greater than 20% attrition.                                                    |
| 17 | <b>Gill, 2010</b>                  |  |  |  |  |  |  |  |                                                                                |
| 18 | <b>Heine, 2005</b> <sup>*</sup>    |  |  |  |  |  |  |  | Open label. Higher attrition in the exenatide arm.                             |

1  
2  
3  
4  
5  
6  
7  
8  
9  
10  
11  
12  
13  
14  
15  
16  
17  
18  
19  
20  
21  
22  
23  
24  
25  
26  
27  
28  
29  
30  
31  
32  
33  
34  
35  
36  
37  
38  
39  
40  
41  
42  
43  
44  
45  
46  
47  
48  
49

1  
2  
3  
4  
5  
6  
7  
8  
9  
10  
11  
12  
13  
14  
15  
16  
17  
18  
19  
20  
21  
22  
23  
24  
25  
26  
27  
28  
29  
30  
31  
32  
33  
34  
35  
36  
37  
38  
39  
40  
41  
42  
43  
44  
45  
46  
47  
48  
49

|    |                                              |  |  |  |  |  |  |  |                                                                                                                                     |
|----|----------------------------------------------|--|--|--|--|--|--|--|-------------------------------------------------------------------------------------------------------------------------------------|
| 19 | <b>Kadowaki,*<br/>2009</b>                   |  |  |  |  |  |  |  |                                                                                                                                     |
| 20 | <b>Kendall,<br/>2005</b>                     |  |  |  |  |  |  |  |                                                                                                                                     |
| 21 | <b>Kim, 2007</b>                             |  |  |  |  |  |  |  |                                                                                                                                     |
| 22 | <b>Liutkus,<br/>2010*</b>                    |  |  |  |  |  |  |  |                                                                                                                                     |
| 23 | <b>Marre,<br/>2009</b>                       |  |  |  |  |  |  |  | Higher attrition in the placebo arm. Restriction of glimipiride and rosiglitazone in some countries precluded maximal dose regimes. |
| 24 | <b>Moretto,<br/>2008</b>                     |  |  |  |  |  |  |  | Diet and exercise regimes not standardised.                                                                                         |
| 25 | <b>Nauck,<br/>2007</b> <sup>□</sup>          |  |  |  |  |  |  |  | Open label.                                                                                                                         |
| 26 | <b>Nauck,<br/>2009</b> <sup>□</sup>          |  |  |  |  |  |  |  | Higher attrition in Liraglutide 1.8 mg and placebo arms.                                                                            |
| 27 | <b>Pratley,<br/>2010</b>                     |  |  |  |  |  |  |  | Open label, but statistician was masked to the allocation.                                                                          |
| 28 | <b>Russell-Jones,<br/>2009*</b> <sup>□</sup> |  |  |  |  |  |  |  | Insulin glargine arm-open label.                                                                                                    |
| 29 | <b>Russell-Jones<br/>2012</b> <sup>□</sup>   |  |  |  |  |  |  |  |                                                                                                                                     |



|    |              |   |   |   |   |   |   |   |                                                                  |
|----|--------------|---|---|---|---|---|---|---|------------------------------------------------------------------|
| 30 | Yang, 2011   | ■ | ■ | ■ | ■ | ■ | ■ | ■ | Higher attrition in the liraglutide groups.                      |
| 31 | Zinman, 2007 | ■ | ■ | ■ | ■ | ■ | ■ | ■ | Greater than 20% attrition. Higher attrition in exenatide group. |
| 32 | Zinman, 2009 | ■ | ■ | ■ | ■ | ■ | ■ | ■ | Greater than 20% attrition. Higher attrition in placebo group.   |

\* Open label; □ method of randomisation/allocation concealment consisted of a computer random-number generator and voice-response or telephone system; □ permuted block randomisation; ¥ randomised according to baseline biochemical values or background pharmacological agent; † randomised according to coded envelopes designed by a statistician ■ high risk; ■ low risk; ■ unclear risk.

1  
2  
3  
4  
5  
6  
7  
8  
9  
10  
11  
12  
13  
14  
15  
16  
17  
18  
19  
20  
21  
22  
23  
24  
25  
26  
27  
28  
29  
30  
31  
32  
33  
34  
35  
36  
37  
38  
39  
40  
41  
42  
43

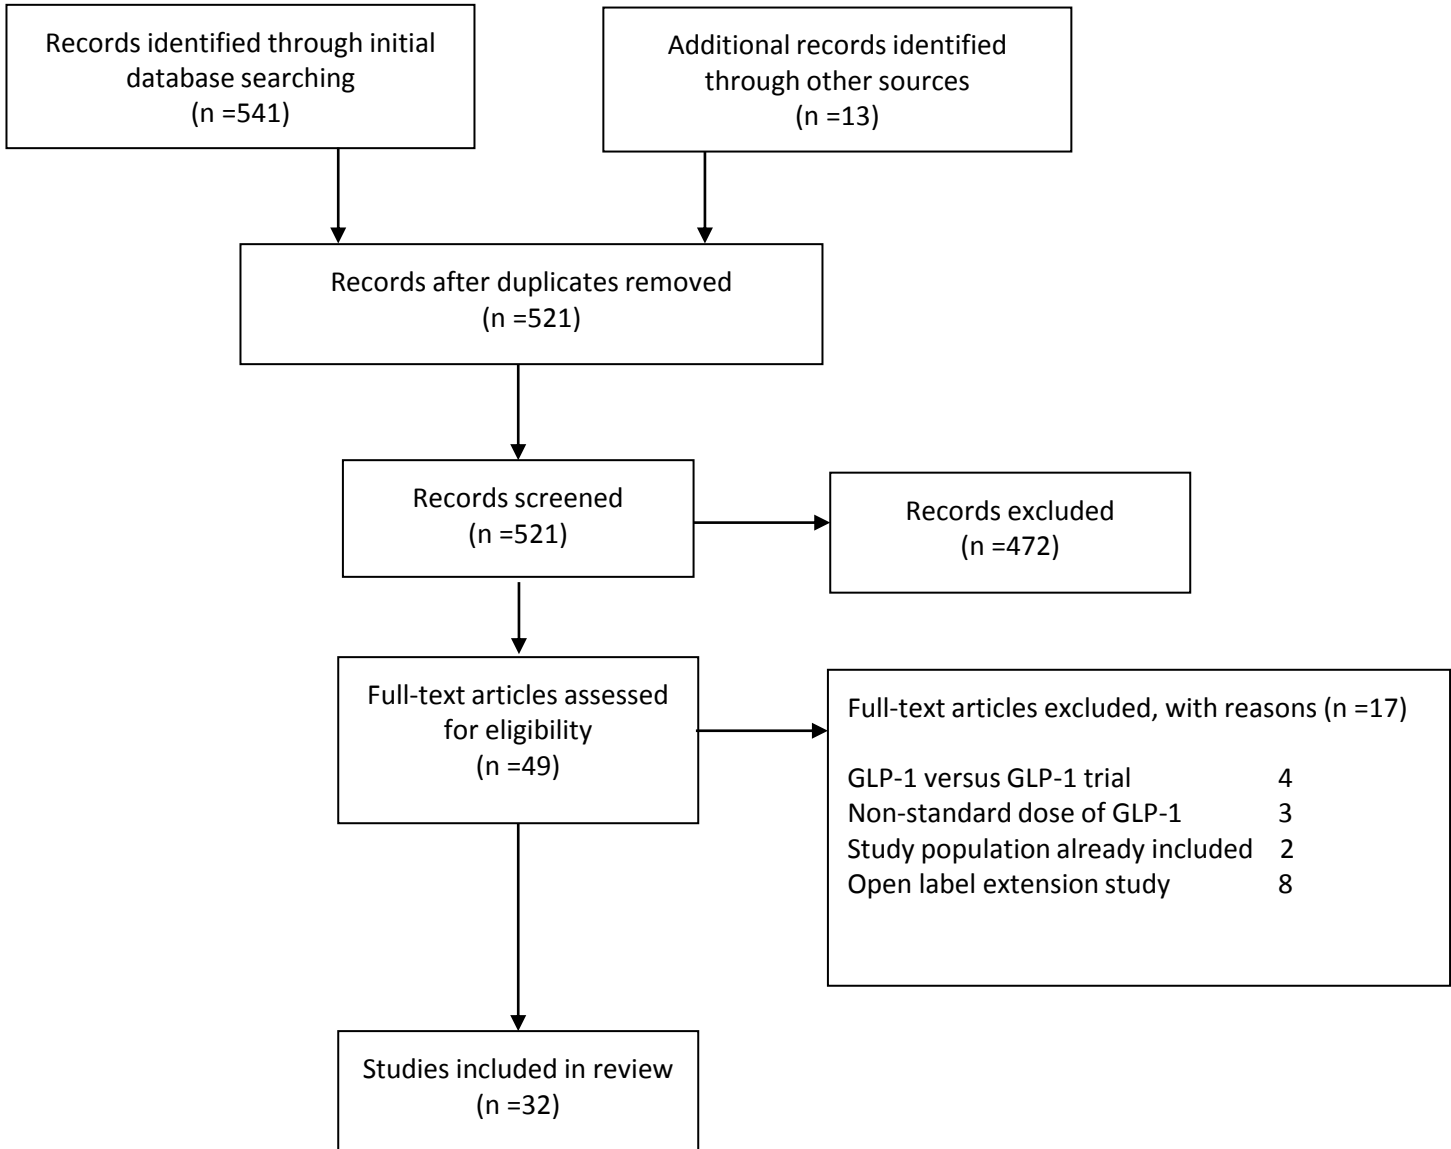

Figure 2 Effect of Liraglutide on heart rate in patients with type 2 diabetes

2a Liraglutide versus placebo

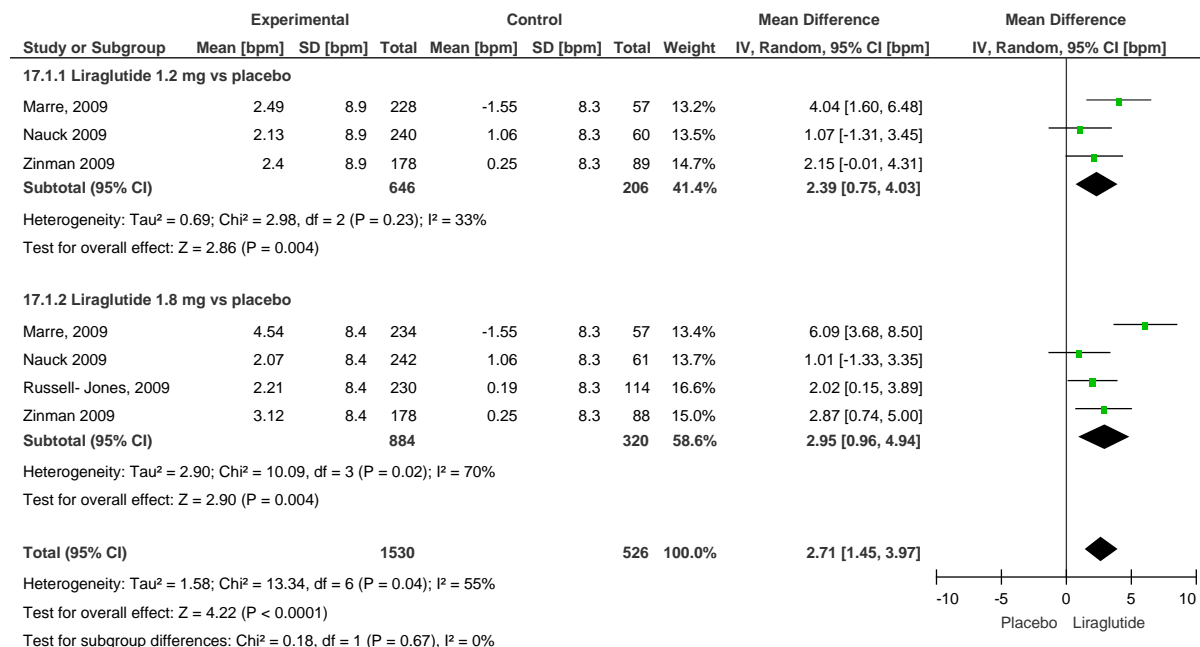

2b Liraglutide versus active control

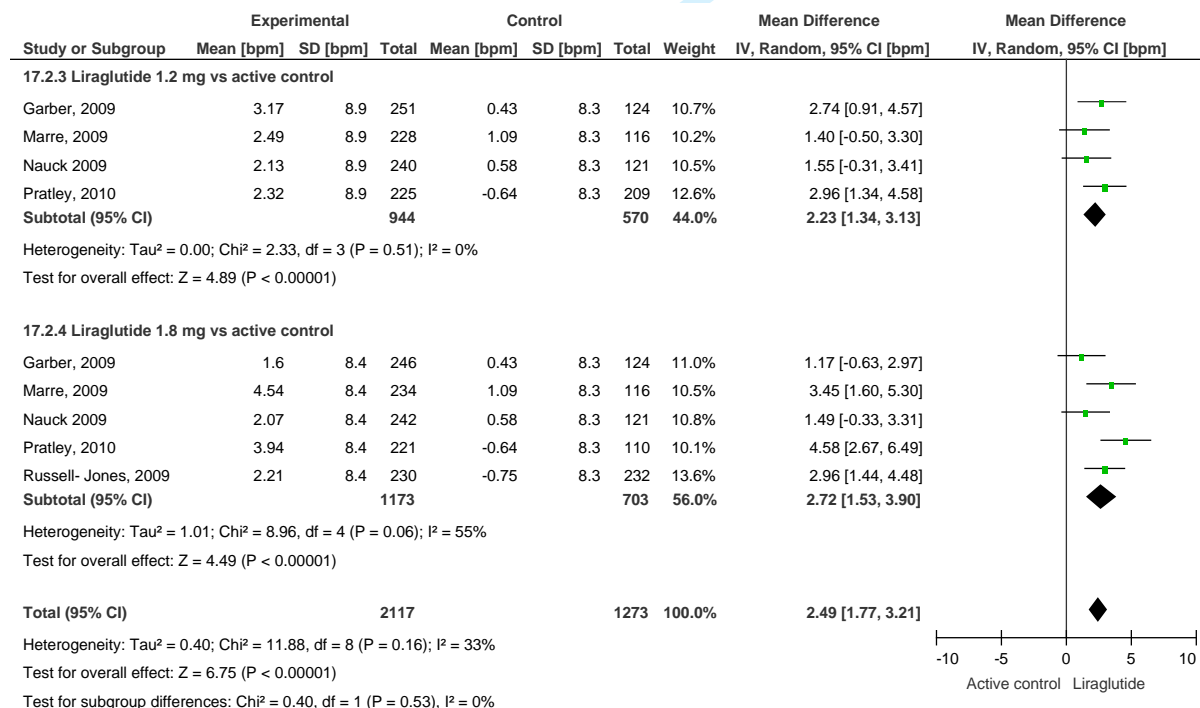

Figure 3 Effect of exenatide on heart rate in patients with type 2 diabetes

3(a) Exenatide versus placebo

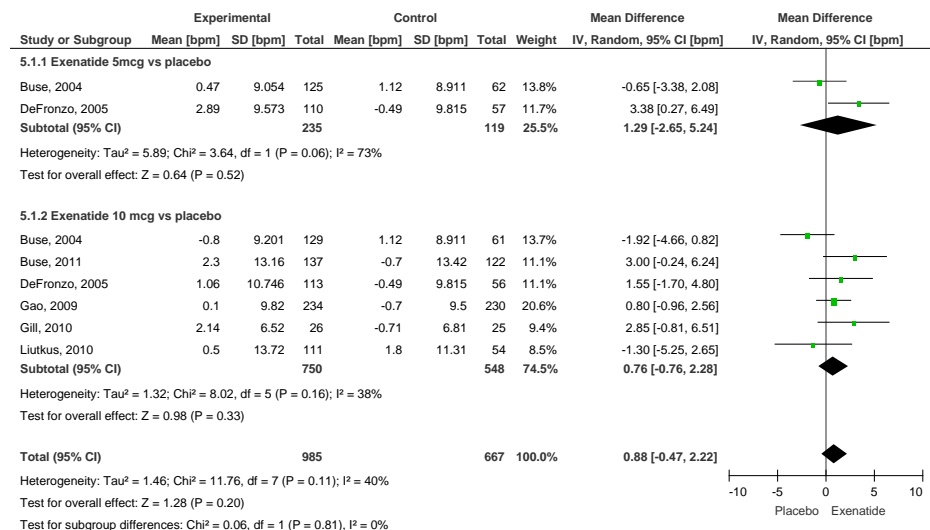

3(b) Exenatide versus active control

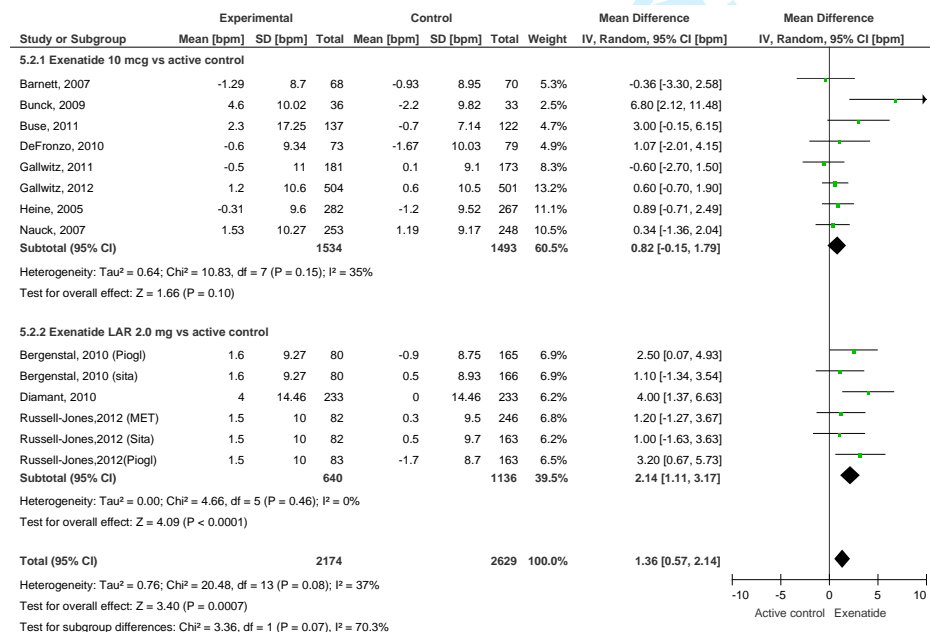

Figure 4 GLP-1 agonists' effect on systolic blood pressure in patients with type 2 diabetes

4(a) GLP-1 vs placebo

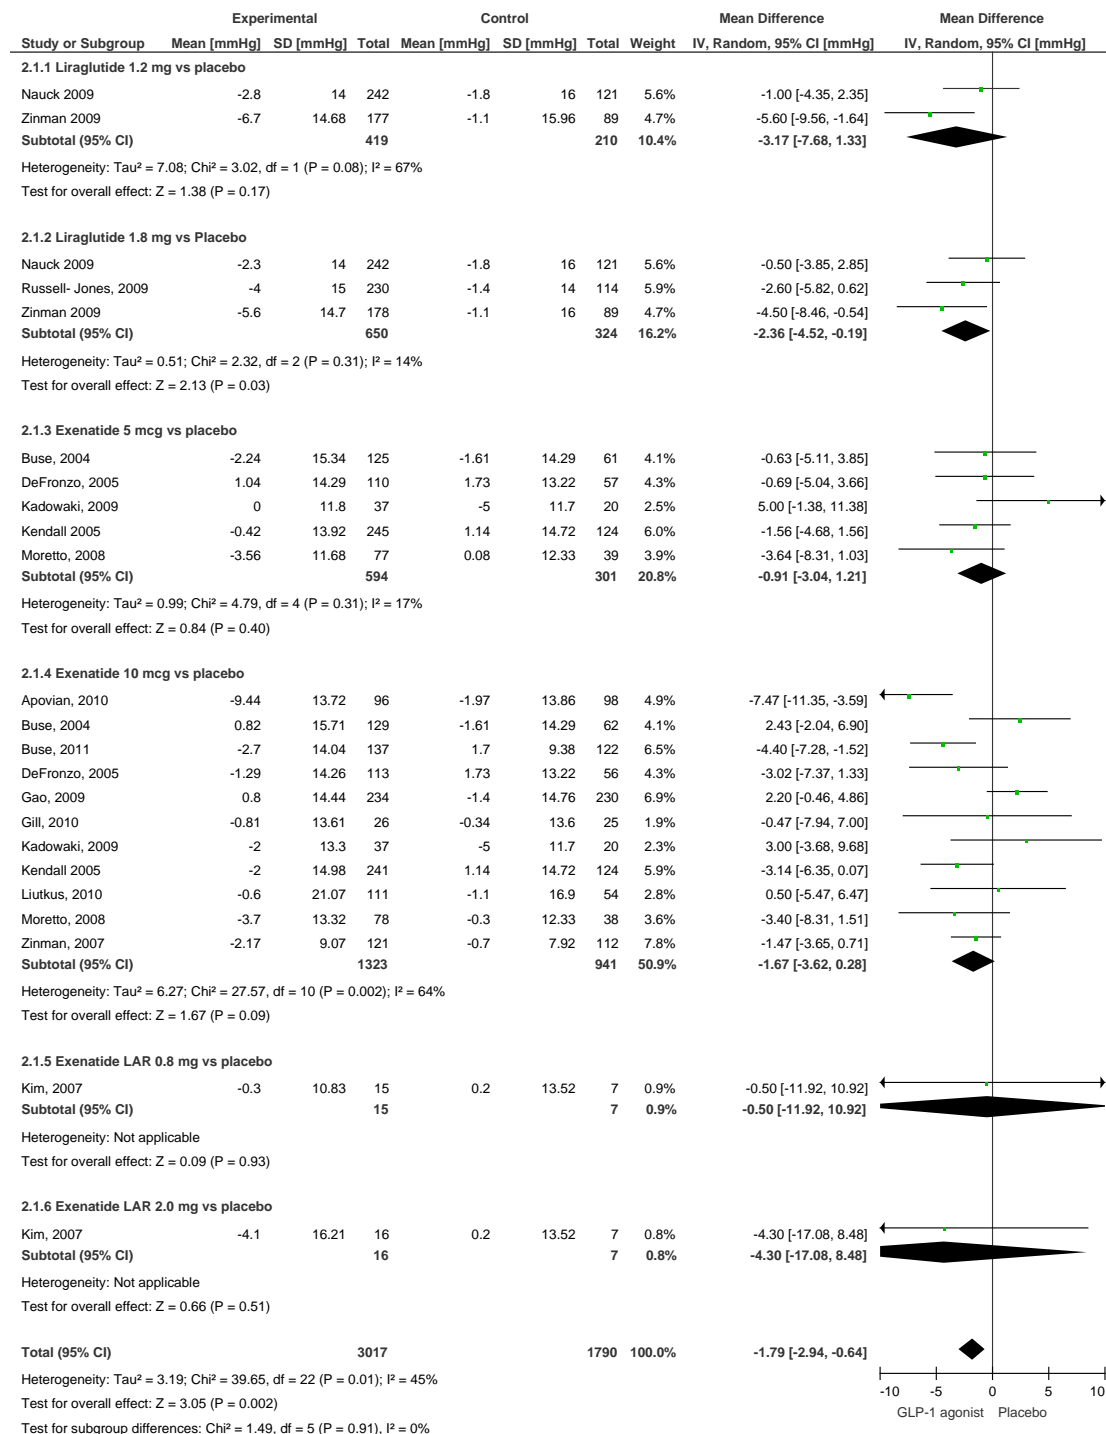

4(b) GLP-1 vs active control

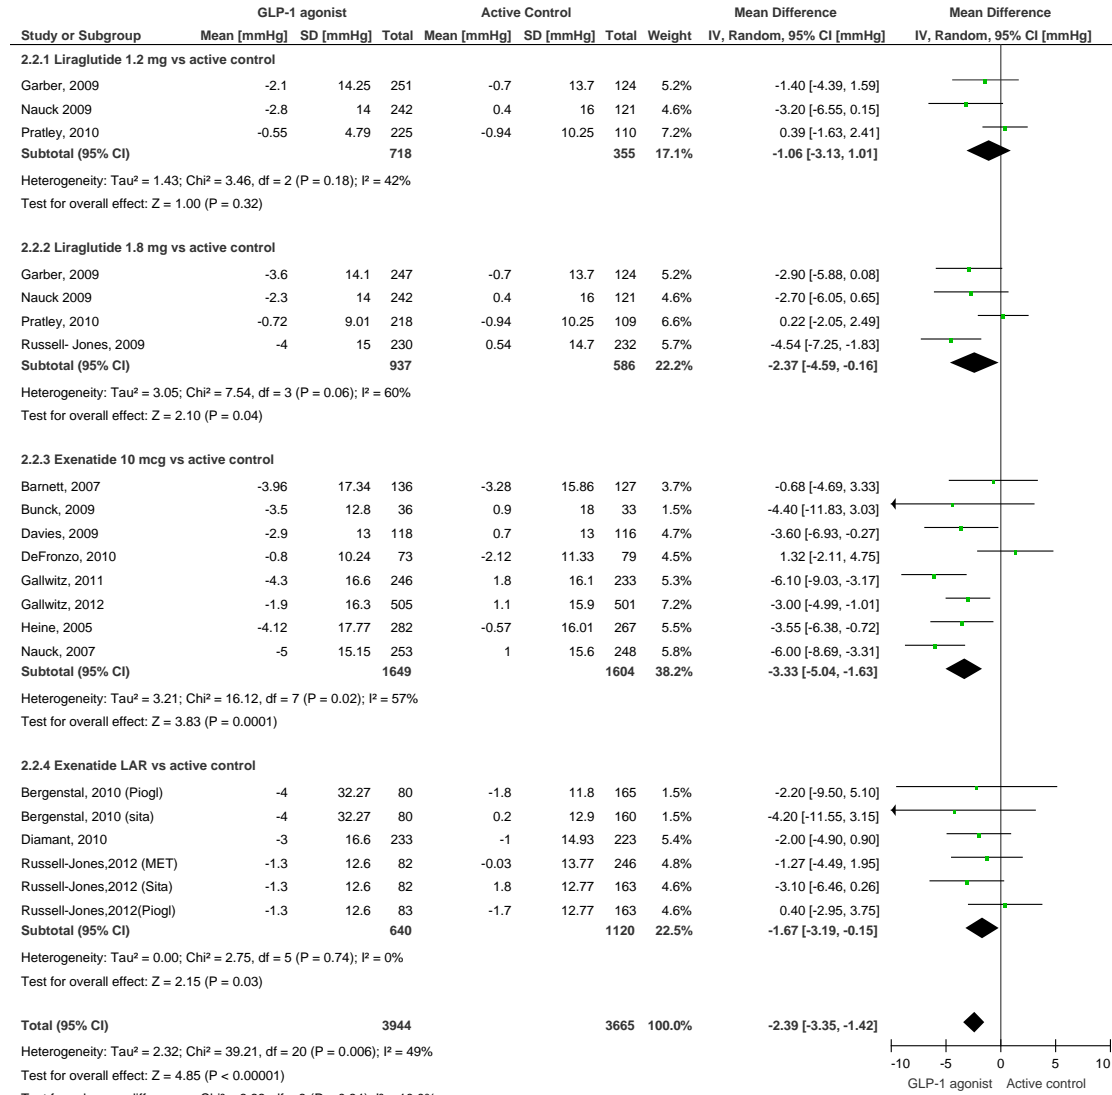

**Figure 5 GLP-1 agonists' effect on diastolic blood pressure in patients with type 2 diabetes**

**5(a) GLP-1 vs placebo**

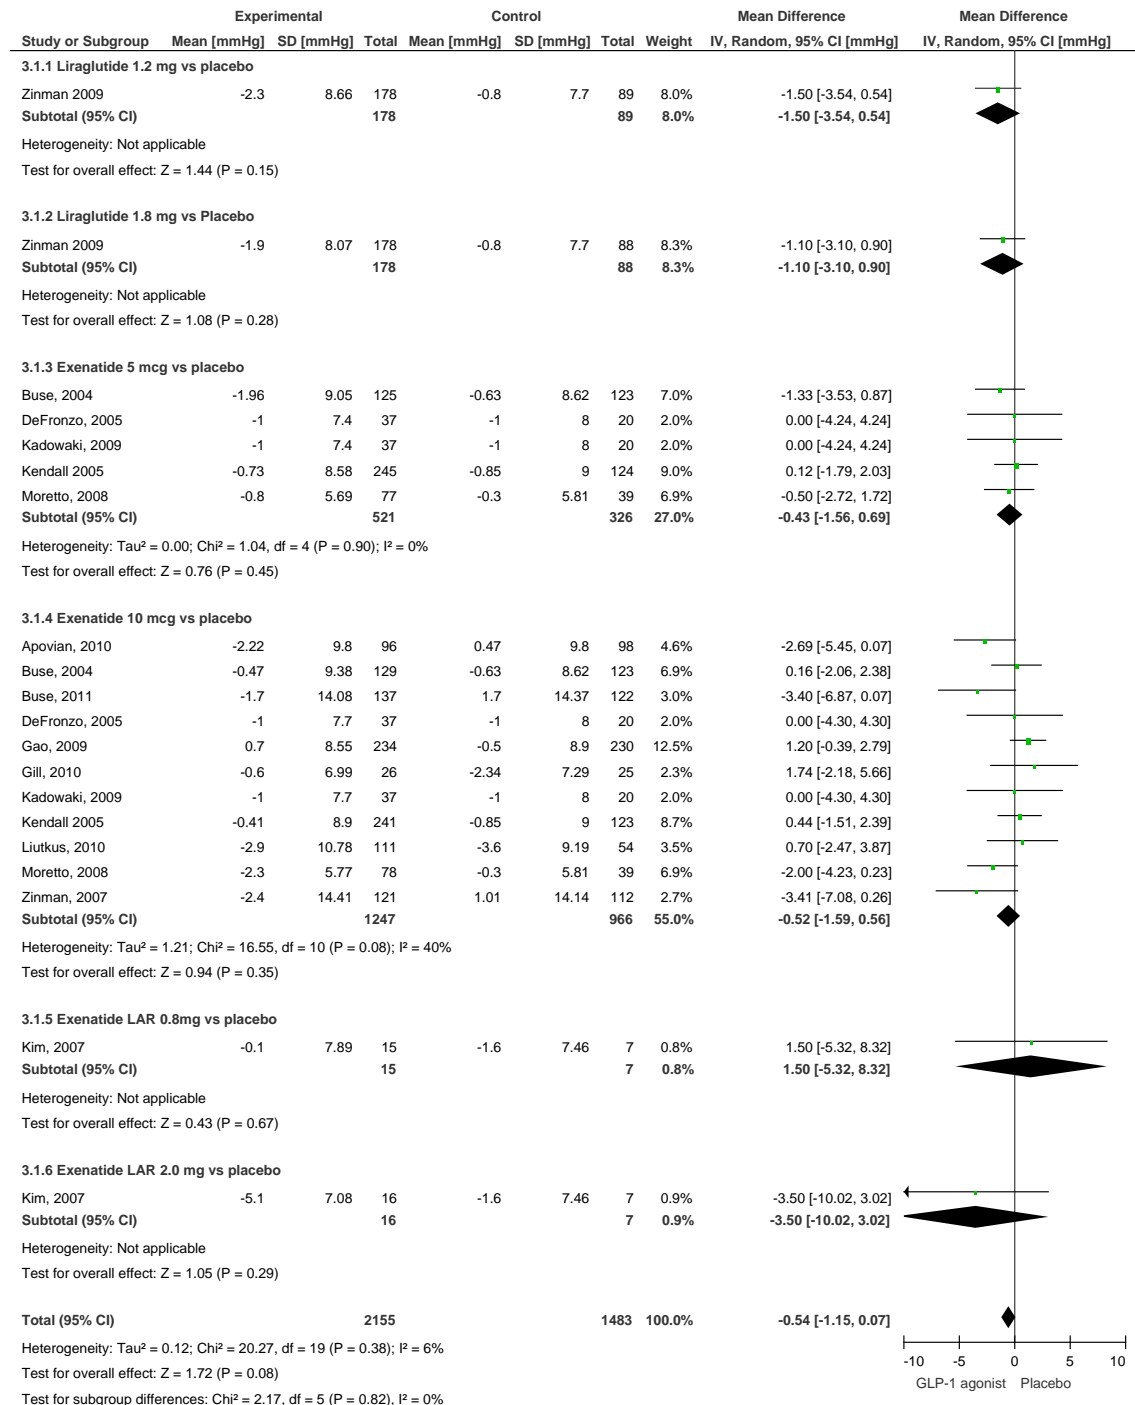

5(b) GLP-1 vs active control

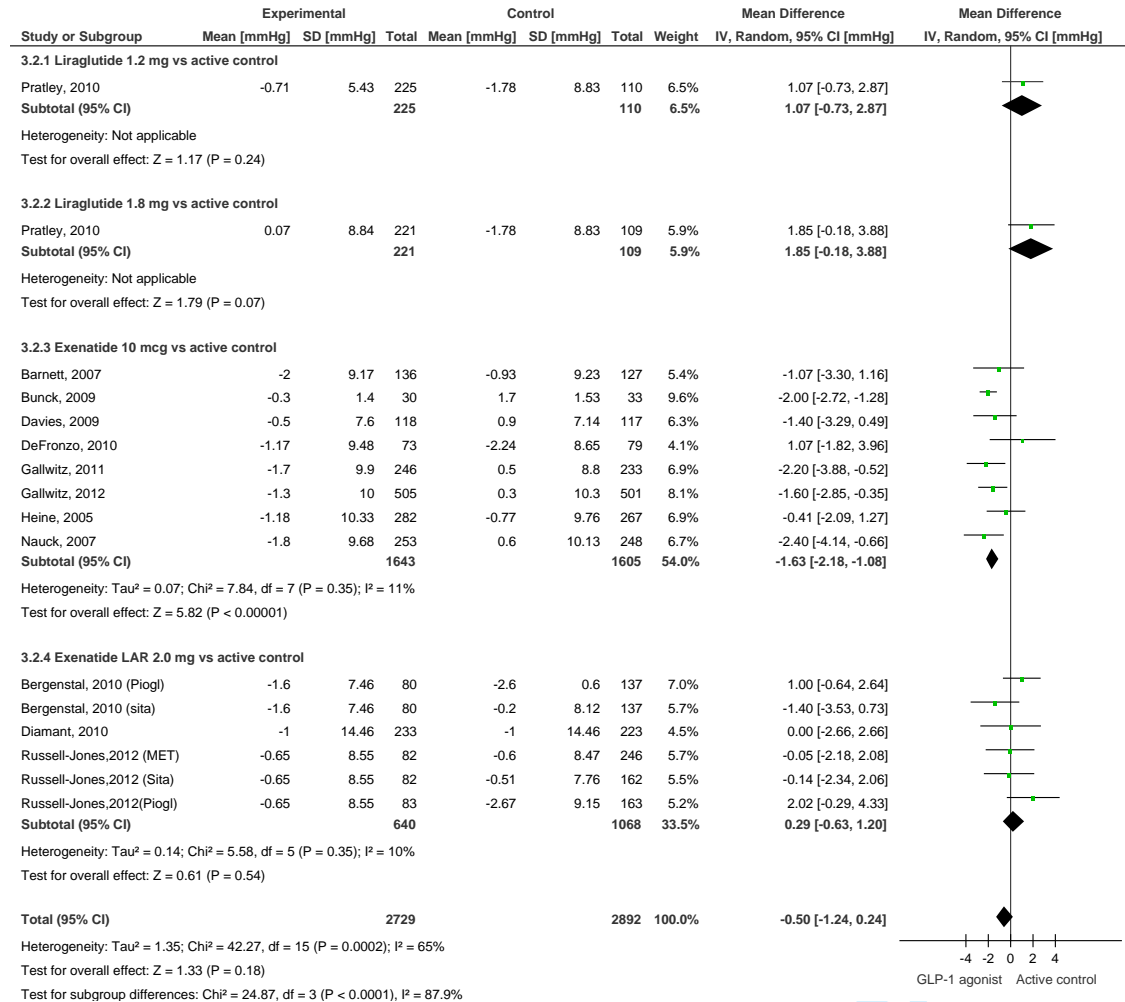



Figure 6 GLP-1 agonists' effects on body weight

6(a) GLP-1 agonists versus placebo

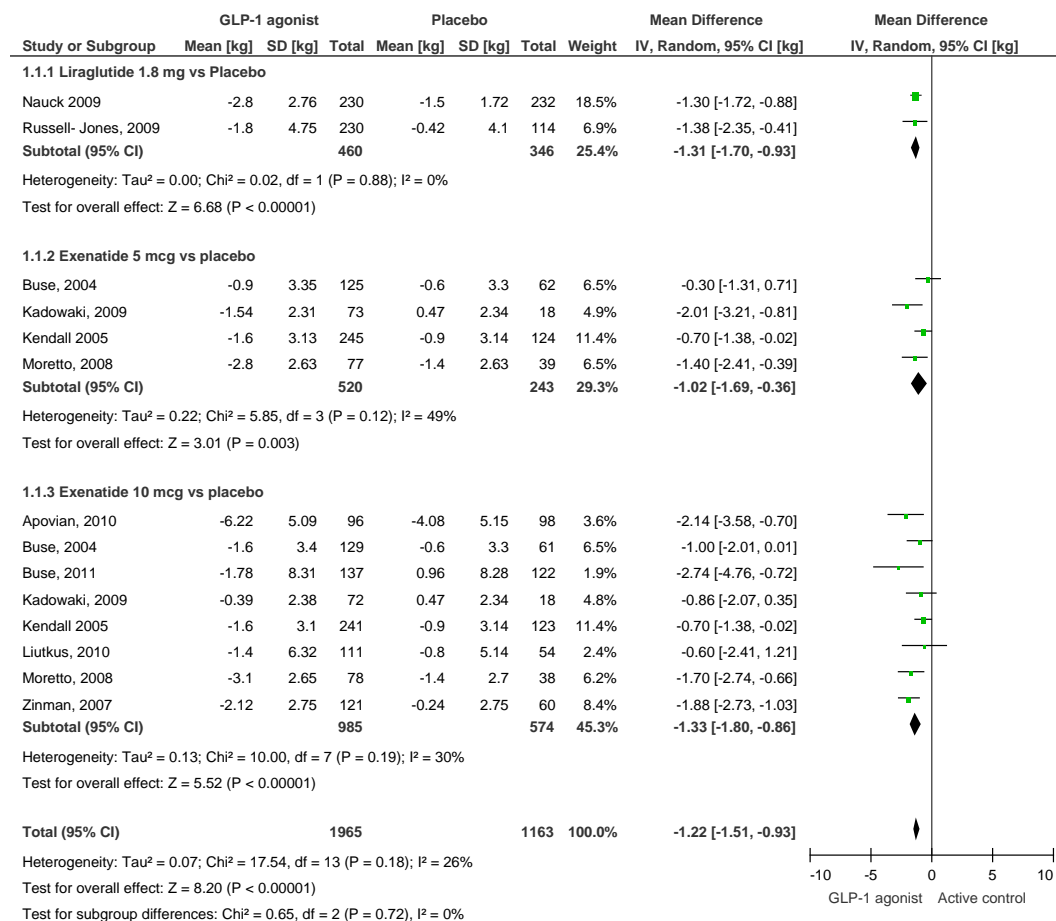

Peer review only

## 6(b) GLP-1 agonists versus active control

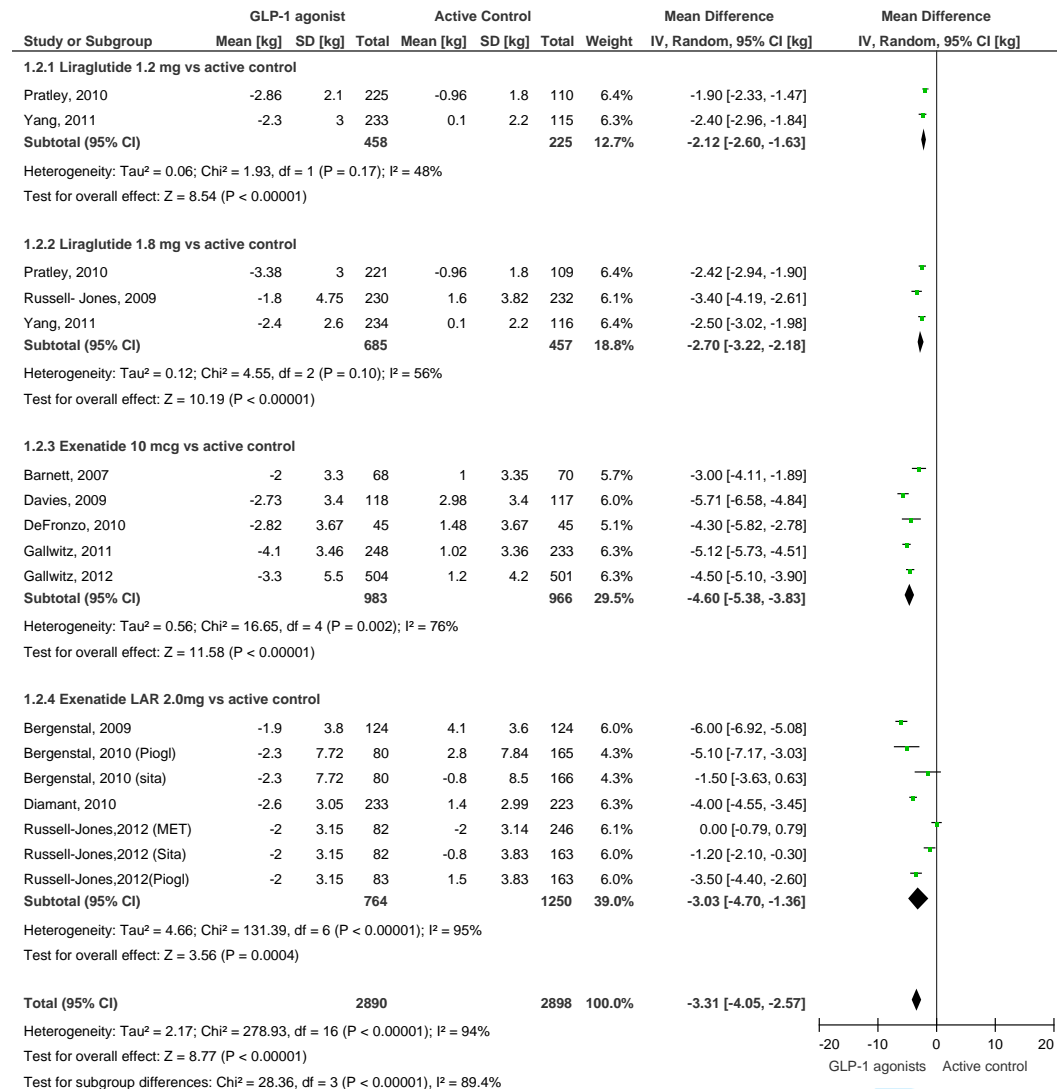

Supplement: bmjopen-2012-001986.draft_revisions.pdf [file bmjopen-2012-001986.draft_revisions.pdf]
